# Supplementary material for: RNA-seq Profiles of Immune Related Genes in the Staghorn Coral Acropora cervicornis Infected with White Band Disease
Source: PLoS One. 2013 Nov 21;8(11):e81821. doi: 10.1371/journal.pone.0081821 (PMC3836749; doi:10.1371/journal.pone.0081821)
Supplement: Table S1 — Dataset of annotated (E-val<10-5 ) coral transcripts exhibiting differential expression between healthy and diseased samples (adj p-val<0.05). (XLSX) [file pone.0081821.s001.xlsx]

## Sheet: Sheet1
Gene	id	baseMean	log2FoldChange	padj	Swiss	E	Org
1-acylglycerol-3-phosphate O-acyltransferase ABHD5	comp5509_c0_seq1	357.29	1.7249	0.00316631	Q5RBI4	9e-90	Pongo abelii
2-amino-3-ketobutyrate coenzyme A ligase, mitochondrial	comp7329_c0_seq1	125.99	1.33439	0.0459728	O75600	1e-123	Homo sapiens
40S ribosomal protein S12	comp40799_c0_seq1	683.283	13.1071	5.97e-21	P06147	1e-47	Tetrahyme thermophila
5-hydroxytryptamine receptor 1A-beta	comp14507_c0_seq1	105.528	1.95519	0.00027425	O42384	5e-11	Takifugu rubripes
A disintegrin and metalloproteinase with thrombospondin motifs 16	comp3338_c0_seq1	5214.52	6.05133	2.31e-24	Q8TE57	1e-104	Homo sapiens
A disintegrin and metalloproteinase with thrombospondin motifs 20	comp53700_c0_seq1	18.5232	2.30632	0.0307405	P59511	4e-47	Mus musculus
A disintegrin and metalloproteinase with thrombospondin motifs 6	comp59572_c0_seq1	11.3941	2.32522	0.0388236	Q9UKP5	3e-15	Homo sapiens
A disintegrin and metalloproteinase with thrombospondin motifs 7	comp44568_c0_seq1	26.8641	-2.32531	0.00431717	Q9UKP4	0	Homo sapiens
A disintegrin and metalloproteinase with thrombospondin motifs 7	comp34040_c0_seq1	15.1745	-1.91869	0.039462	Q9UKP4	2e-28	Homo sapiens
A disintegrin and metalloproteinase with thrombospondin motifs 9	comp29893_c0_seq1	231.036	2.19536	0.00677205	Q9P2N4	4e-171	Homo sapiens
A disintegrin and metalloproteinase with thrombospondin motifs 9	comp19012_c0_seq1	116.656	2.519	4.66e-06	Q9P2N4	4e-55	Homo sapiens
Acetyl-CoA carboxylase	comp9391_c0_seq1	246.47	-1.87893	0.0437357	P11029	0	Gallus gallus
Acetyl-CoA carboxylase 1	comp12674_c0_seq1	42.4476	-2.07658	0.0414235	P11497	1e-80	Rattus norvegicus
Acetyl-coenzyme A synthetase 2-like, mitochondrial	comp21921_c0_seq1	83.3219	-1.93732	0.0299796	Q99NB1	0	Mus musculus
Acyl-CoA desaturase	comp788_c0_seq1	564.019	-1.69394	0.0310057	Q92038	8e-93	Cyprinus carpio
Adhesive plaque matrix protein 2	comp1897_c0_seq1	75.0232	1.42482	0.0281075	Q25464	0.005	Mytilus galloprovincialis
ADP-ribosylation factor-like protein 6	comp10337_c0_seq1	106.526	1.64228	0.0166143	Q5M9P8	1e-65	Danio rerio
Alanine--glyoxylate aminotransferase 2-like 1	comp3722_c0_seq1	352.285	1.50601	0.0297389	Q8TBG4	1e-58	Homo sapiens
Alanine--glyoxylate aminotransferase 2-like 1	comp6987_c0_seq1	155.403	1.6273	0.0324681	Q7SY54	1e-56	Danio rerio
Alanyl-tRNA synthetase, cytoplasmic	comp79481_c0_seq1	2.92924	-100000	0.0259419	Q54Y20	4e-32	Dictyostelium discoideum
Aldehyde dehydrogenase family 1 member L1	comp1106_c0_seq1	2068.87	2.46163	2.52e-07	Q6GNL7	0	Xenopus laevis
ALK tyrosine kinase receptor	comp23985_c0_seq1	44.0682	2.28137	0.000612694	P97793	4e-06	Mus musculus
Alkaline phosphatase, tissue-nonspecific isozyme	comp20351_c0_seq1	19.1957	-3.32875	0.0022921	P09487	5e-17	Bos taurus
Allene oxide synthase	comp1900_c0_seq1	1149.55	2.05124	0.0471736	Q40778	2e-14	Parthenium argentatum
Allene oxide synthase-lipoxygenase protein	comp3828_c0_seq1	1363.27	2.11709	4.23e-05	O16025	0	Plexaura homomalla
Allene oxide synthase-lipoxygenase protein	comp31122_c0_seq1	26.3772	2.97352	5.4e-06	O16025	6e-38	Plexaura homomalla
Allene oxide synthase-lipoxygenase protein	comp13551_c0_seq1	34.3815	3.34151	2.9e-08	O16025	2e-44	Plexaura homomalla
Allene oxide synthase-lipoxygenase protein	comp911_c0_seq1	2598.4	4.36792	1.68e-23	O16025	2e-41	Plexaura homomalla
Allene oxide synthase-lipoxygenase protein	comp47519_c0_seq1	10.1597	7.06618	6.14e-08	O16025	4e-09	Plexaura homomalla
Allene oxide synthase-lipoxygenase protein	comp24905_c0_seq1	36.1468	8.44201	2.67e-27	O16025	2e-29	Plexaura homomalla
Alpha-2C adrenergic receptor	comp12571_c0_seq1	249.642	2.45446	0.0251013	Q90WY6	5e-08	Danio rerio
Alpha-2-macroglobulin-like protein 1	comp781_c0_seq1	1272.88	1.80079	0.0060273	A8K2U0	5e-37	Homo sapiens
Alpha-aminoadipic semialdehyde synthase, mitochondrial	comp26450_c0_seq1	34.8725	1.86449	0.0249649	A8E657	2e-132	Bos taurus
Alpha-aminoadipic semialdehyde synthase, mitochondrial	comp10640_c0_seq1	85.4217	2.2426	0.00500376	A8E657	4e-27	Bos taurus
Alpha-type platelet-derived growth factor receptor	comp33979_c0_seq1	26.133	1.77583	0.0132532	P26619	3e-58	Xenopus laevis
Alternative oxidase, mitochondrial	comp4681_c0_seq1	401.251	4.83972	2.59e-28	Q9P959	2e-59	Emericella nidulans
Amiloride-sensitive sodium channel subunit gamma	comp55081_c0_seq1	6.28325	3.81083	0.00137307	P51171	0.008	Xenopus laevis
AMME syndrome candidate gene 1 protein homolog	comp5203_c0_seq1	189.206	1.37737	0.0179805	Q5RAS7	2e-68	Pongo abelii
Angiomotin-like protein 1	comp15321_c0_seq1	91.6454	1.80087	0.00252785	Q8IY63	6e-24	Homo sapiens
Ankyrin-1	comp20419_c0_seq1	87.4496	2.90707	6.36e-06	Q02357	2e-37	Mus musculus
Ankyrin-3	comp46523_c0_seq1	8.88894	3.10975	0.00643947	Q12955	0.001	Homo sapiens
Annexin A13	comp13987_c0_seq1	221.644	2.7871	0.012752	Q99JG3	1e-22	Mus musculus
Apolipophorins	comp4280_c0_seq1	1272.21	1.88379	0.000275653	Q9U943	5e-55	Locusta migratoria
Apolipophorins	comp2657_c0_seq1	789.567	2.32574	1.51e-06	Q9U943	1e-27	Locusta migratoria
ATP synthase subunit alpha, mitochondrial	comp67384_c0_seq1	8.88404	10000	1.82e-11	P15999	2e-28	Rattus norvegicus
ATP-binding cassette sub-family A member 1	comp4284_c0_seq1	1239.84	1.94162	0.00127152	P41233	0	Mus musculus
Balbiani ring protein 3	comp2448_c0_seq1	1225.99	2.64527	0.012018	Q03376	8e-10	Chironomus tentans
Band 4.1-like protein 2	comp2698_c0_seq1	332.54	1.54266	0.0269831	O43491	6e-54	Homo sapiens
Band 4.1-like protein 2	comp1232_c0_seq1	2284.33	1.69633	0.00680963	O70318	8e-09	Mus musculus
Bandaporin	comp65407_c0_seq1	21.7935	-100000	7.3e-08	C5NSL2	2e-22	Anthopleura asiatica
Bardet-Biedl syndrome 12 protein	comp18766_c0_seq1	65.7122	-3.20114	8.18e-05	Q6ZW61	0.0003	Homo sapiens
Basement membrane-specific heparan sulfate proteoglycan core protein	comp18768_c0_seq1	119.628	1.51179	0.038173	P98160	3e-06	Homo sapiens
Battenin	comp48118_c0_seq1	7.10942	3.8325	0.000605403	Q29611	0.0001	Canis lupus familiaris
B-cell receptor CD22	comp17991_c0_seq1	40.4012	-1.94944	0.0391273	P20273	0.0003	Homo sapiens
Beta,beta-carotene 15,15'-monooxygenase	comp8590_c0_seq1	314.273	3.85926	7.72e-05	Q9JJS6	4e-50	Mus musculus
Beta,beta-carotene 15,15'-monooxygenase	comp3595_c0_seq1	518.411	4.07846	6.49e-07	Q9JJS6	6e-26	Mus musculus
Beta-galactosidase	comp29617_c0_seq1	23.3111	-2.49638	0.0481255	O19015	2e-128	Felis catus
Bone morphogenetic protein 1	comp9989_c0_seq1	184.592	2.37564	7.8e-06	P98063	3e-79	Mus musculus
Bone morphogenetic protein 3B	comp15975_c0_seq1	108.7	-4.20577	2.01e-06	Q08DX6	9e-09	Bos taurus
Brain-specific angiogenesis inhibitor 1	comp7901_c0_seq1	1773.66	3.85827	4.42e-10	Q3UHD1	8e-65	Mus musculus
Breakpoint cluster region protein	comp17928_c0_seq1	270.491	1.6077	0.00713177	Q6PAJ1	3e-119	Mus musculus
BTB/POZ domain-containing protein 2	comp8720_c0_seq1	117.118	1.68307	0.00614335	Q9BX70	7e-47	Homo sapiens
Cadherin EGF LAG seven-pass G-type receptor 2	comp49398_c0_seq1	22.2153	2.2146	0.00293382	Q9HCU4	5e-25	Homo sapiens
Cadherin EGF LAG seven-pass G-type receptor 3	comp25606_c0_seq1	60.6632	-2.45086	0.0148657	O88278	2e-55	Rattus norvegicus
Cadherin EGF LAG seven-pass G-type receptor 3	comp42066_c0_seq1	13.6399	2.06141	0.0420172	Q9NYQ7	4e-10	Homo sapiens
Cadherin EGF LAG seven-pass G-type receptor 3	comp20122_c0_seq1	116.304	3.6645	3.96e-05	Q91ZI0	3e-05	Mus musculus
Calcium-binding protein 5	comp33495_c0_seq1	116.454	2.96317	7.09e-06	Q9N1Q8	3e-06	Bos taurus
Calcium-binding protein CML19	comp3815_c0_seq1	572.708	3.19726	3.06e-12	O23184	5e-08	Arabidopsis thalia
Calmodulin	comp14671_c0_seq1	103.902	2.4508	0.00264892	Q8STF0	5e-28	Strongylocentrotus intermedius
Calmodulin	comp8012_c0_seq1	81.1948	3.55722	7.34e-12	P11118	2e-33	Eugle gracilis
Calmodulin	comp27514_c0_seq1	43.3939	3.99612	0.00406385	P69098	9e-06	Trypanosoma brucei gambiense
Calsequestrin-1	comp6299_c0_seq1	402.673	1.74529	0.00917727	P07221	2e-49	Oryctolagus cuniculus
Calumenin	comp1243_c0_seq1	735.801	2.73743	0.000652072	Q5RDD8	4e-08	Pongo abelii
cAMP-dependent protein kinase type II-alpha regulatory subunit	comp55337_c0_seq1	6.18336	10000	5.28e-08	P00515	0.0001	Bos taurus
Carbonic anhydrase 2	comp340_c0_seq1	1449.41	-2.58104	0.00344708	P00919	1e-37	Oryctolagus cuniculus
Carbonic anhydrase 2	comp20773_c0_seq1	49.6329	2.70309	0.00836599	P00920	9e-33	Mus musculus
Carbonic anhydrase 3	comp20245_c0_seq1	56.4898	1.77361	0.00388568	P07450	8e-15	Equus caballus
Carnitine O-acetyltransferase	comp950_c0_seq1	1398.39	1.68864	0.0204282	P52826	2e-143	Columba livia
Cartilage intermediate layer protein 1	comp13899_c0_seq1	66.9609	-2.84974	0.017767	O75339	5e-13	Homo sapiens
Caspase-3	comp4050_c0_seq1	702.95	2.67561	0.000383968	P70677	4e-26	Mus musculus
Caspase-8	comp10111_c0_seq1	227.04	-2.30148	0.0151621	O89110	3e-24	Mus musculus
Cathepsin L	comp452_c0_seq1	1783.5	2.04466	0.0087642	Q26636	3e-95	Sarcophaga peregri
Cathepsin L1	comp3408_c0_seq1	47.1131	1.70918	0.0232315	P07154	0.0001	Rattus norvegicus
Cdc42-interacting protein 4 homolog	comp3943_c0_seq1	916.441	2.23648	1.53e-05	Q5U3Q6	2e-73	Danio rerio
Cell adhesion molecule 4	comp85473_c0_seq1	3.24609	-100000	0.0288733	Q8NFZ8	0.0007	Homo sapiens
Chondroitin sulfate synthase 1	comp14768_c0_seq1	296.068	1.67089	0.0093685	Q86X52	2e-164	Homo sapiens
Chondroitin sulfate synthase 3	comp20407_c0_seq1	42.7915	2.2795	0.000690613	Q5DTK1	9e-43	Mus musculus
Chordin	comp17456_c0_seq1	142.465	1.58876	0.0277772	O57472	6e-54	Danio rerio
Chorion transcription factor Cf2	comp13444_c0_seq1	146.672	-1.60797	0.0392925	P20385	1e-26	Drosophila melanogaster
Chymotrypsin-like protease CTRL-1	comp3087_c0_seq1	265.281	1.53218	0.0496511	P40313	7e-48	Homo sapiens
Clumping factor B	comp94092_c0_seq1	6.12129	-100000	0.0014064	Q7A382	0.007	Staphylococcus aureus subsp. aureus N315
Coagulation factor VIII	comp15896_c0_seq1	117.808	2.39248	6.57e-06	P12263	4e-21	Sus scrofa
Coagulation factor VIII	comp67420_c0_seq1	7.30676	3.47199	0.0176563	O18806	0.005	Canis lupus familiaris
Cofilin/actin-depolymerizing factor homolog 2	comp5922_c0_seq1	67.3461	1.42633	0.0248416	P86293	1e-07	Plasmodium falciparum HB3
Coiled-coil domain-containing protein 105	comp11067_c0_seq1	147.535	2.192	3.02e-05	Q2YDN4	8e-38	Bos taurus
Collagen alpha-1(X) chain	comp10665_c0_seq1	214.923	3.95555	0.00110815	Q03692	0.0009	Homo sapiens
Collagen alpha-1(XI) chain	comp15243_c0_seq1	40.2834	4.09545	0.0311639	Q28083	1e-07	Bos taurus
Collagen alpha-1(XII) chain	comp10761_c0_seq1	133.208	-4.14156	1.41e-05	P13944	3e-22	Gallus gallus
Collagen alpha-1(XII) chain	comp69593_c0_seq1	9.54247	2.45999	0.0471736	Q60847	8e-11	Mus musculus
Collagen alpha-1(XII) chain	comp42363_c0_seq1	3.47052	4.1324	0.0139955	Q99715	1e-11	Homo sapiens
Conodipine-M alpha chain	comp3797_c0_seq1	79.85	2.98912	1.15e-05	Q9TWL9	3e-10	Conus magus
Contactin-1a	comp19830_c0_seq1	10.4915	-100000	2.19e-05	Q8AXZ4	0.0004	Danio rerio
Contactin-3	comp26869_c0_seq1	71.9689	3.93597	0.000110083	Q62682	2e-14	Rattus norvegicus
Contactin-6	comp20824_c0_seq1	31.9406	3.6932	1.99e-06	Q9UQ52	8e-05	Homo sapiens
Contactin-associated protein like 5-1	comp53388_c0_seq1	27.3291	-2.86531	0.00558285	Q0V8T6	3e-09	Rattus norvegicus
Contactin-associated protein-like 5	comp14361_c0_seq1	310.376	-12.4211	5.3e-18	Q0V8S9	2e-21	Gallus gallus
Cornifelin homolog	comp12610_c0_seq1	7.4427	-5.15397	0.00845528	Q66I68	4e-18	Danio rerio
Crumbs homolog 1	comp19862_c0_seq1	53.7427	-2.02073	0.0177298	P82279	4e-19	Homo sapiens
Crumbs homolog 1	comp3700_c0_seq1	574.536	3.4833	2.3e-07	P82279	2e-15	Homo sapiens
C-type lectin domain family 10 member A	comp14551_c0_seq1	51.9144	5.38854	2.58e-05	Q8IUN9	2e-12	Homo sapiens
C-type mannose receptor 2	comp13167_c0_seq1	110.165	2.20575	2.88e-05	Q64449	4e-18	Mus musculus
CUB and sushi domain-containing protein 1	comp10451_c0_seq1	176.828	3.07147	0.00994774	Q96PZ7	2e-18	Homo sapiens
CUB and sushi domain-containing protein 3	comp24541_c0_seq1	74.0123	-2.9869	0.00330254	Q80T79	5e-10	Mus musculus
CUB and zona pellucida-like domain-containing protein 1	comp5610_c0_seq1	73.968	-2.8952	0.000536785	P70412	0.0001	Mus musculus
Cubilin	comp53368_c0_seq1	8.84971	-2.24931	0.0471736	Q9TU53	6e-05	Canis lupus familiaris
Cyclic AMP-dependent transcription factor ATF-2	comp5480_c0_seq1	357.555	1.50146	0.0247503	O93602	1e-31	Gallus gallus
Cyclic AMP-responsive element-binding protein 3-like protein 2	comp3454_c0_seq1	418.349	1.65104	0.00710906	Q8BH52	1e-43	Mus musculus
Cysteine and glycine-rich protein 1	comp6127_c0_seq1	383.745	2.78355	1.82e-09	Q5RCT4	3e-30	Pongo abelii
Cytochrome b	comp4724_c0_seq1	127.788	2.07182	0.000203266	Q8SJB6	9e-143	Acropora tenuis
Cytochrome b-245 heavy chain	comp4488_c0_seq1	104.359	2.1937	3.67e-05	P04839	7e-14	Homo sapiens
Cytochrome b-245 heavy chain	comp3164_c0_seq1	770.641	2.35221	1.16e-06	Q95L74	9e-135	Bison bison
Cytochrome c oxidase subunit 2	comp116_c0_seq1	2024.19	2.0626	0.000276733	O47496	6e-92	Metridium senile
Cytochrome P450 1A1	comp5307_c0_seq1	265.215	1.97014	0.00180692	Q6GUR1	2e-59	Macaca mulatta
Cytochrome P450 3A8	comp9118_c0_seq1	170.441	1.70552	0.00494518	P33268	1e-78	Macaca fascicularis
Cytochrome P450 3A8	comp3862_c0_seq1	129.791	1.77464	0.00276521	P33268	1e-78	Macaca fascicularis
D-amino-acid oxidase	comp4454_c0_seq1	4548.26	7.82593	2.54e-05	Q99042	2e-29	Trigonopsis variabilis
Daple-like protein	comp22577_c0_seq1	130.184	1.71379	0.0112808	P85120	9e-79	Xenopus laevis
DCN1-like protein 3	comp4868_c0_seq1	137.955	1.34812	0.0477792	Q5R9G1	2e-58	Pongo abelii
Death effector domain-containing protein	comp69052_c0_seq1	7.28931	-2.53774	0.0494368	Q9Z2K0	7e-06	Rattus norvegicus
Deleted in malignant brain tumors 1 protein	comp7953_c0_seq1	136.76	-1.98785	0.00325299	Q60997	4e-19	Mus musculus
Delta-latroinsectotoxin-Lt1a	comp19790_c0_seq1	46.0983	1.68336	0.00845694	Q25338	7e-11	Latrodectus tredecimguttatus
DENN domain-containing protein 1A	comp20973_c0_seq1	79.692	1.82332	0.00332849	Q68F67	2e-75	Xenopus laevis
Dentin sialophosphoprotein	comp13724_c0_seq1	96.2648	8.32763	1.38e-18	Q9NZW4	4e-12	Homo sapiens
Dicer-like protein 1	comp6656_c0_seq1	385.142	-1.94366	0.0189945	A4RKC3	2e-17	Magporthe oryzae 70-15
Diencephalon/mesencephalon homeobox protein 1-B	comp34153_c0_seq1	23.1925	2.96628	1.76e-05	Q566X8	9e-21	Danio rerio
Dimethylaniline monooxygenase [N-oxide-forming] 2	comp37595_c0_seq1	8.09137	2.04806	0.0213163	Q6IRI9	2e-05	Rattus norvegicus
Dipeptidase 1	comp6545_c0_seq1	126.675	-2.38978	0.0209729	P16444	1e-89	Homo sapiens
Discoidin domain-containing receptor 2	comp14168_c0_seq1	112.607	2.93842	6.61e-09	Q62371	1e-08	Mus musculus
Disrupted in renal carcinoma protein 2 homolog	comp49700_c0_seq1	7.52814	-3.62161	0.0114172	Q8BFQ6	7e-43	Mus musculus
Docking protein 5	comp7382_c0_seq1	465.986	2.12194	9.43e-05	Q91ZM9	0.003	Mus musculus
Dopamine D2-like receptor	comp46487_c0_seq1	32.1797	2.48723	0.000113932	Q8IS44	3e-11	Drosophila melanogaster
Dual specificity mitogen-activated protein kinase kinase 6	comp12691_c0_seq1	117.475	1.42979	0.0388811	Q5E9X2	7e-97	Bos taurus
Dynein heavy chain 10, axonemal	comp27451_c0_seq1	108.723	1.98454	0.00113233	Q8IVF4	7e-130	Homo sapiens
Dynein heavy chain 10, axonemal	comp35718_c0_seq1	27.5004	2.05014	0.00991139	Q8IVF4	1e-39	Homo sapiens
Dynein heavy chain 10, axonemal	comp23037_c0_seq1	77.4827	2.05448	0.000383968	Q8IVF4	1e-133	Homo sapiens
Dynein heavy chain 10, axonemal	comp19390_c0_seq1	339.199	2.05468	9.17e-05	Q8IVF4	0	Homo sapiens
Dynein heavy chain 10, axonemal	comp29455_c0_seq1	43.4484	2.1145	0.00175721	Q8IVF4	1e-53	Homo sapiens
Dynein heavy chain 10, axonemal	comp17717_c0_seq1	286.773	2.28848	1.07e-05	Q8IVF4	0	Homo sapiens
Dynein heavy chain 10, axonemal	comp9574_c0_seq1	349.939	2.61458	8.36e-08	Q8IVF4	0	Homo sapiens
Dysferlin-interacting protein 1	comp12520_c0_seq1	172.383	1.68093	0.0216428	Q9D119	1e-15	Mus musculus
Dystroglycan	comp5127_c0_seq1	651.046	2.00604	0.0144623	Q28685	7e-12	Oryctolagus cuniculus
Dystroglycan	comp6835_c0_seq1	162.344	2.14946	0.000250647	Q9TSZ6	6e-05	Canis lupus familiaris
Dystroglycan	comp1964_c0_seq1	1414.3	2.19135	0.0119712	Q28685	2e-18	Oryctolagus cuniculus
E3 ubiquitin-protein ligase MIB2	comp6850_c0_seq1	348.967	-2.47383	0.00999338	Q68LP1	5e-09	Rattus norvegicus
E3 ubiquitin-protein ligase NRDP1	comp6920_c0_seq1	158.613	2.09239	5.8e-05	Q8BH75	0.005	Mus musculus
EGF-like repeat and discoidin I-like domain-containing protein 3	comp3114_c0_seq1	1047.05	-11.175	0.0422517	O43854	8e-24	Homo sapiens
Elongation factor 1-alpha	comp9963_c0_seq1	334.113	10000	2.98e-72	P25166	2e-180	Stylonychia leme
Elongation factor 1-alpha 2	comp42090_c0_seq1	15.676	10000	6.68e-18	Q2HJN8	7e-44	Oscheius tipulae
Endoglucanase E	comp314_c0_seq1	7132.72	6.22784	1.5e-09	P10477	2e-07	Clostridium thermocellum
Endothelin-converting enzyme 1	comp5874_c0_seq1	460.586	2.07524	0.0004596	P42893	2e-99	Rattus norvegicus
Ephrin type-A receptor 2	comp15759_c0_seq1	109.296	-2.07189	0.00682735	Q03145	1e-08	Mus musculus
Epithelial discoidin domain-containing receptor 1	comp4597_c0_seq1	483.965	3.00513	1.11e-10	Q63474	2e-05	Rattus norvegicus
Erythronolide synthase, modules 3 and 4	comp1932_c0_seq1	1973.46	-2.57176	0.0113592	Q03132	2e-110	Saccharopolyspora erythraea
Extracellular sulfatase Sulf-1	comp4228_c0_seq1	786.703	1.69591	0.00387265	Q8IWU6	1e-142	Homo sapiens
Fat-like cadherin-related tumor suppressor homolog	comp31156_c0_seq1	34.9676	2.52161	2.21e-05	Q9VW71	5e-34	Drosophila melanogaster
FH1/FH2 domain-containing protein 3	comp12848_c0_seq1	53.8325	1.63973	0.0166055	Q76LL6	7e-06	Mus musculus
Fibrillin-3	comp1408_c0_seq1	653.687	2.10961	9.29e-05	Q75N90	3e-54	Homo sapiens
Fibroblast growth factor 22	comp13009_c0_seq1	151.729	2.66988	4.8e-07	Q9HCT0	2e-12	Homo sapiens
Fibroblast growth factor receptor	comp39996_c0_seq1	12.9709	2.0849	0.0356101	Q86PM4	2e-10	Hydra vulgaris
Fibroblast growth factor receptor 2	comp17757_c0_seq1	113.834	2.02042	0.00986198	Q03364	3e-77	Xenopus laevis
Fibrocystin-L	comp55909_c0_seq1	27.3826	3.30642	9.82e-05	Q80ZA4	4e-35	Mus musculus
Fibrocystin-L	comp31437_c0_seq1	77.6423	3.67277	0.0302749	Q86WI1	8e-101	Homo sapiens
Fibrocystin-L	comp30267_c0_seq1	86.93	3.6786	0.0133923	Q86WI1	9e-122	Homo sapiens
Fibrocystin-L	comp69406_c0_seq1	5.90362	3.76679	0.00902749	Q80ZA4	4e-12	Mus musculus
Fibrocystin-L	comp53475_c0_seq1	11.7583	3.86565	0.00334868	Q86WI1	3e-08	Homo sapiens
Fibrocystin-L	comp30961_c0_seq1	40.8192	4.16748	0.00792923	Q86WI1	4e-94	Homo sapiens
Fibrocystin-L	comp52177_c0_seq1	15.8526	4.34152	0.0118626	Q86WI1	2e-14	Homo sapiens
Fibropellin-1	comp12096_c0_seq1	160.699	1.57335	0.0275559	P10079	8e-94	Strongylocentrotus purpuratus
Fibropellin-1	comp4138_c0_seq1	1555.55	3.13522	4.09e-05	P10079	0	Strongylocentrotus purpuratus
Fibropellin-1	comp75640_c0_seq1	4.64303	3.56461	0.0219218	P10079	7e-27	Strongylocentrotus purpuratus
Fibropellin-3	comp35620_c0_seq1	22.2506	4.49337	1.25e-11	P49013	0.0001	Strongylocentrotus purpuratus
Fibulin-2	comp1372_c0_seq1	196.326	2.01569	0.000328842	P37889	3e-12	Mus musculus
Focal adhesion kinase 1	comp3716_c0_seq1	745.054	1.54756	0.0167678	Q91738	0	Xenopus laevis
Follistatin-related protein 4	comp17582_c0_seq1	48.1603	-3.39631	0.000320047	Q6MZW2	1e-08	Homo sapiens
Follistatin-related protein 5	comp23732_c0_seq1	13.3934	-4.71291	0.00599167	Q8N475	0.001	Homo sapiens
Forkhead box protein O1	comp20052_c0_seq1	134.464	2.2039	0.0213752	Q6EUW2	4e-18	Xenopus laevis
Four and a half LIM domains protein 2	comp43122_c0_seq1	47.6178	2.90876	2.64e-07	Q14192	1e-31	Homo sapiens
Frizzled-5	comp3487_c0_seq1	104.535	1.56911	0.00510831	Q8CHL0	2e-44	Rattus norvegicus
Frizzled-5	comp16822_c0_seq1	44.5909	4.9533	7.53e-18	Q8CHL0	3e-35	Rattus norvegicus
Gag polyprotein	comp94967_c0_seq1	4.14059	-5.47972	0.0471736	P33458	0.006	Caprine arthritis encephalitis virus strain Cork
Galanin receptor type 3	comp14065_c0_seq1	76.0164	1.60035	0.0159323	O88626	1e-15	Rattus norvegicus
GAS2-like protein 2	comp17072_c0_seq1	184.864	1.55744	0.012296	Q5SSG4	1e-46	Mus musculus
Gelsolin, cytoplasmic	comp51775_c0_seq1	15.653	1.99131	0.0245221	Q27319	3e-49	Homarus americanus
General transcription factor 3C polypeptide 6	comp6592_c0_seq1	108.709	1.40197	0.045077	Q9D8P7	4e-13	Mus musculus
Girdin	comp13015_c0_seq1	316.114	1.51171	0.0129198	Q5SNZ0	4e-23	Mus musculus
Glutamyl aminopeptidase	comp12951_c0_seq1	57.2478	-2.62309	0.00406141	P16406	9e-65	Mus musculus
Glutamyl aminopeptidase	comp9048_c0_seq1	125.022	-2.28498	0.00951557	Q32LQ0	2e-43	Bos taurus
Glutaredoxin	comp1501_c0_seq1	721.898	2.05706	0.0218223	Q9HU55	1e-09	Pseudomos aeruginosa
Golgi-associated plant pathogenesis-related protein 1	comp16097_c0_seq1	32.9148	1.71691	0.012893	Q9H4G4	5e-16	Homo sapiens
Golgi-associated plant pathogenesis-related protein 1	comp1053_c0_seq1	1110.64	1.9447	0.000273353	Q9CYL5	1e-12	Mus musculus
Golgi-associated plant pathogenesis-related protein 1	comp4225_c0_seq1	95.472	3.55304	0.0376099	Q9H4G4	6e-16	Homo sapiens
Golgi-associated plant pathogenesis-related protein 1	comp7725_c0_seq1	462.665	6.12865	2.72e-30	Q9CYL5	0.002	Mus musculus
Granulins	comp1616_c0_seq1	349.075	-2.22098	0.0223419	P28799	6e-09	Homo sapiens
Graves disease carrier protein	comp12805_c0_seq1	210.806	2.75039	2.47e-05	Q01888	7e-67	Bos taurus
Gremlin-1	comp17701_c0_seq1	141.873	2.46641	3.61e-06	O35793	3e-20	Rattus norvegicus
Gremlin-1	comp26833_c0_seq1	7.23263	2.96917	0.00529053	O73755	1e-07	Gallus gallus
Gremlin-1	comp39087_c0_seq1	16.8952	2.97496	6.56e-05	O73755	5e-14	Gallus gallus
Growth arrest and DNA damage-inducible protein GADD45 gamma	comp7255_c0_seq1	239.425	2.35283	2.33e-06	O95257	3e-08	Homo sapiens
GTPase-activating protein	comp6095_c0_seq1	279.799	1.61047	0.00764426	P33277	2e-68	Schizosaccharomyces pombe 972h-
H/ACA ribonucleoprotein complex non-core subunit NAF1	comp6441_c0_seq1	47.0066	-2.89983	0.00134919	Q96HR8	0.004	Homo sapiens
Hatching enzyme	comp760_c0_seq1	1398.68	3.29569	0.0013181	P22757	1e-37	Paracentrotus lividus
Hemagglutinin/amebocyte aggregation factor	comp11535_c0_seq1	50.783	-2.77192	0.000369395	Q01528	1e-13	Limulus polyphemus
Hemagglutinin/amebocyte aggregation factor	comp1346_c0_seq1	217.85	-2.29804	0.0355616	Q01528	3e-16	Limulus polyphemus
Hemagglutinin/amebocyte aggregation factor	comp36046_c0_seq1	16.5514	-1.87113	0.0271319	Q01528	3e-09	Limulus polyphemus
Hemicentin-1	comp12325_c0_seq1	114.5	-5.29671	2.57e-07	Q96RW7	2e-14	Homo sapiens
Hemicentin-1	comp36866_c0_seq1	11.5617	-3.84289	0.00241012	Q96RW7	4e-32	Homo sapiens
Hemicentin-1	comp35468_c0_seq1	14.9275	-3.08112	0.00171408	Q96RW7	1e-47	Homo sapiens
Hemicentin-1	comp23168_c0_seq1	16.3398	-2.44843	0.0129393	Q96RW7	2e-23	Homo sapiens
Hemicentin-1	comp34025_c0_seq1	44.9385	1.7429	0.034135	Q96RW7	1e-08	Homo sapiens
Hemicentin-1	comp5566_c0_seq1	715.064	3.13772	0.00019923	Q96RW7	8e-30	Homo sapiens
Heparan sulfate glucosamine 3-O-sulfotransferase 5	comp45545_c0_seq1	5.89835	-2.8725	0.0425913	Q8BSL4	1e-31	Mus musculus
Heparan-alpha-glucosaminide N-acetyltransferase	comp4197_c0_seq1	725.012	2.37393	3.28e-06	Q68CP4	3e-100	Homo sapiens
Heparin-binding growth factor 1	comp5754_c0_seq1	177.192	1.36578	0.0388236	Q6GLR6	2e-11	Xenopus laevis
Heparin-binding growth factor 1	comp16640_c0_seq1	70.5831	4.7842	5.38e-19	Q7SIF8	2e-14	Notophthalmus viridescens
Heparin-binding growth factor 2	comp11598_c0_seq1	92.8837	3.30725	2.48e-11	P12226	9e-12	Xenopus laevis
Heparin-binding growth factor 2	comp5621_c0_seq1	333.993	4.14585	1.71e-20	P12226	4e-06	Xenopus laevis
Heparin-binding growth factor 2	comp11982_c0_seq1	126.595	4.58747	2.96e-21	P20003	4e-09	Ovis aries
Heparin-binding growth factor 2	comp12637_c0_seq1	503.924	6.13346	1.22e-20	P12226	2e-05	Xenopus laevis
Hepatocyte nuclear factor 3-beta	comp5329_c0_seq1	372.934	1.36597	0.0474826	O42097	1e-54	Oryzias latipes
High-affinity choline transporter 1	comp18410_c0_seq1	123.312	2.93196	0.0167685	Q9VE46	6e-149	Drosophila melanogaster
Histamine H2 receptor	comp71287_c0_seq1	17.6407	-8.2804	3.5e-06	P47747	1e-12	Cavia porcellus
Histamine H2 receptor	comp38277_c0_seq1	22.5203	-2.66752	0.0224942	P47747	1e-22	Cavia porcellus
Histamine H2 receptor	comp25647_c0_seq1	53.3517	2.61256	4.34e-06	P17124	2e-23	Canis lupus familiaris
Histamine H2 receptor	comp19781_c0_seq1	113.955	5.2772	2.12e-08	P47747	9e-10	Cavia porcellus
Histamine H4 receptor	comp30189_c0_seq1	22.3002	1.96605	0.0263873	Q9H3N8	0.0001	Homo sapiens
Histone H1.0-A	comp17334_c0_seq1	104.179	-8.63275	1.17e-12	P22845	5e-14	Xenopus laevis
Histone H2A	comp34944_c0_seq1	22.9003	-8.65775	3.56e-07	P35061	4e-13	Acropora formosa
Histone H2A.1	comp33668_c0_seq1	70.0738	10000	1.32e-41	P04911	3e-22	Saccharomyces cerevisiae S288c
Histone H2B	comp18240_c0_seq1	76.3092	10.1987	8.63e-42	O97484	1e-38	Moneuplotes crassus
Histone H3	comp42889_c0_seq1	41.3722	-7.64863	0.00617913	P08437	4e-24	Volvox carteri
Histone H4	comp20260_c0_seq1	64.4219	10000	2.2e-40	P62791	2e-26	Stylonychia leme
Homeobox protein MOX-1	comp28886_c0_seq1	24.4782	-2.82761	0.0232351	A1YGA4	7e-23	Pan paniscus
Homeobox protein Nkx-2.2a	comp26014_c0_seq1	34.1313	3.07464	1.79e-05	Q90481	1e-19	Danio rerio
Homeobox protein Nkx-2.5	comp1599_c0_seq1	991.064	2.35796	4.66e-06	P42583	2e-32	Xenopus laevis
Homeobox protein Nkx-6.1	comp38004_c0_seq1	27.6678	2.02608	0.0314513	O35762	5e-30	Rattus norvegicus
Homeobox protein OTX2	comp6852_c0_seq1	203.41	1.42299	0.0295754	Q91981	2e-25	Danio rerio
Homeobox protein SIX2	comp14786_c0_seq1	52.7696	1.76494	0.0243819	Q9NPC8	4e-22	Homo sapiens
Homeobox protein SIX3	comp10063_c0_seq1	94.9054	3.24139	1.27e-10	O42406	2e-91	Gallus gallus
Homeobox protein unplugged	comp12369_c0_seq1	112.322	3.47205	2.97e-12	Q4V5A3	3e-16	Drosophila melanogaster
Homeobox protein XENK-2	comp6420_c0_seq1	198.788	1.72271	0.00381927	P42587	1e-26	Xenopus laevis
Hypoxia up-regulated protein 1	comp3938_c0_seq1	542.036	1.73521	0.0200232	Q7ZUW2	6e-50	Danio rerio
IgLON family member 5	comp89536_c0_seq1	3.02946	-100000	0.0397392	Q8HW98	0.0008	Mus musculus
IgLON family member 5	comp17307_c0_seq1	89.8112	-6.93688	1.37e-08	Q8HW98	6e-10	Mus musculus
Immediate-early protein	comp17223_c0_seq1	79.788	-2.26249	0.0113766	Q01042	2e-05	Herpesvirus saimiri (strain 11)
Immunoglobulin superfamily member 10	comp20220_c0_seq1	11.5066	-3.13296	0.0277534	Q6WRH9	0.007	Rattus norvegicus
Inactive dipeptidyl peptidase 10	comp54302_c0_seq1	12.2864	-2.2468	0.0371715	Q6Q629	3e-27	Rattus norvegicus
Indole-3-acetic acid-amido synthetase GH3.17	comp94334_c0_seq1	4.78445	4.6237	0.00902998	Q9FZ87	7e-07	Arabidopsis thalia
Insulin-like growth factor 2 mRNA-binding protein 2	comp3340_c0_seq1	284.814	1.43553	0.013141	Q5SF07	3e-21	Mus musculus
Integrin alpha-6	comp15886_c0_seq1	40.3078	2.50624	9.63e-05	P26007	1e-06	Gallus gallus
Integrin alpha-8	comp34044_c0_seq1	64.8445	2.01933	0.00150396	P26009	8e-39	Gallus gallus
Integrin alpha-9	comp1747_c0_seq1	1666.17	1.66588	0.0122215	Q13797	3e-84	Homo sapiens
Integrin alpha-V	comp23697_c0_seq1	187.041	2.33062	1.32e-05	P26008	5e-37	Gallus gallus
Integrin beta pat-3	comp2022_c0_seq1	1543.39	2.23918	1.77e-05	Q27874	3e-70	Caenorhabditis elegans
Integrin beta-2	comp4605_c0_seq1	306.516	2.22245	2.13e-05	P53714	2e-59	Sus scrofa
Integrin beta-like protein C	comp4208_c0_seq1	167.894	-2.84746	0.00066495	Q54JA5	2e-12	Dictyostelium discoideum
Interphotoreceptor matrix proteoglycan 2	comp23610_c0_seq1	23.4234	3.54651	0.00019923	Q9BZV3	0.0003	Homo sapiens
Intracellular protein transport protein USO1	comp17455_c0_seq1	141.873	1.75794	0.00432095	P25386	2e-13	Saccharomyces cerevisiae S288c
Iron/zinc purple acid phosphatase-like protein	comp777_c0_seq1	1040.6	-2.02387	0.0204282	A5D6U8	9e-55	Danio rerio
Isocitrate lyase	comp281_c0_seq1	5692.88	2.51986	0.00282555	Q9K9H0	6e-149	Bacillus halodurans
Kelch-like protein 2	comp687_c0_seq1	666.312	1.59138	0.00447706	O95198	2e-33	Homo sapiens
Kelch-like protein 21	comp91030_c0_seq1	4.11998	-6.16946	0.0467779	Q6NYM1	7e-06	Danio rerio
Keratin-associated protein 10-6	comp6504_c0_seq1	211.802	-1.88311	0.0297389	P60371	4e-21	Homo sapiens
Keratinocyte-associated protein 2	comp845_c0_seq1	114.291	1.20842	0.0372652	Q8N6L1	4e-27	Homo sapiens
Kinesin-related protein 1	comp10261_c0_seq1	120.368	1.78278	0.0115087	Q9NGQ2	6e-35	Dictyostelium discoideum
Lactose-binding lectin l-2	comp17324_c0_seq1	103.609	-3.05388	0.0378314	Q90WJ8	7e-13	Anguilla japonica
Laminin subunit gamma-1	comp20847_c0_seq1	43.0857	1.82024	0.013661	A0JP86	2e-63	Xenopus (Silura) tropicalis
Laminin subunit gamma-1	comp19000_c0_seq1	225.726	1.90238	0.000883046	A0JP86	0	Xenopus (Silura) tropicalis
Laminin subunit gamma-1	comp12882_c0_seq1	212.263	2.40341	1.51e-06	Q1LVF0	3e-16	Danio rerio
L-amino-acid oxidase	comp3748_c0_seq1	118.768	-2.52641	0.000789685	Q96RQ9	0.0005	Homo sapiens
Latrophilin-2	comp38552_c0_seq1	3.01822	-5.01353	0.040472	O95490	0.0001	Homo sapiens
Latrophilin-2	comp3482_c0_seq1	149.734	4.19045	0.0109458	O97817	5e-06	Bos taurus
Leucine-rich repeat and WD repeat-containing protein KIAA1239	comp36749_c0_seq1	30.5545	2.35257	0.00621388	Q9ULI1	7e-16	Homo sapiens
Leucine-rich repeat and WD repeat-containing protein KIAA1239	comp33250_c0_seq1	22.2907	2.60106	0.000719031	Q9ULI1	1e-11	Homo sapiens
Leucine-rich repeats and immunoglobulin-like domains protein 1	comp47398_c0_seq1	71.6395	2.55053	6e-06	Q96JA1	1e-18	Homo sapiens
LIM domain and actin-binding protein 1	comp3142_c0_seq1	960.802	2.08406	3.79e-05	Q9ERG0	2e-26	Mus musculus
Limbic system-associated membrane protein	comp41943_c0_seq1	9.11233	-100000	3.13e-05	Q98919	8e-05	Gallus gallus
Lipase member K	comp831_c0_seq1	1096.35	1.86309	6.41e-05	Q5VXJ0	3e-80	Homo sapiens
Lipase ZK262.3	comp25725_c0_seq1	8.48584	-3.37936	0.0172596	Q9XTR8	0.0002	Caenorhabditis elegans
Long-chain-fatty-acid--CoA ligase 1	comp28850_c0_seq1	48.5516	4.35064	0.00696825	P41216	4e-20	Mus musculus
Long-chain-fatty-acid--CoA ligase 1	comp16328_c0_seq1	314.124	4.44673	9.05e-08	P41216	5e-130	Mus musculus
Low-density lipoprotein receptor-related protein 1B	comp36_c0_seq1	838.952	3.34986	0.000198553	Q9NZR2	0.0001	Homo sapiens
L-tyrosine decarboxylase	comp2764_c0_seq1	1104.45	6.14598	6.34e-07	Q0W498	7e-11	uncultured methanogenic archaeon RC-I
Lysosome membrane protein 2	comp5980_c0_seq1	331.909	2.38029	2.08e-06	O35114	1e-65	Mus musculus
Lysyl oxidase homolog 2	comp14959_c0_seq1	123.793	1.65465	0.00494503	P58022	1e-125	Mus musculus
Lysyl oxidase homolog 4	comp61087_c0_seq1	7.10599	-3.81868	0.0205917	Q8MJ24	1e-05	Bos taurus
Macrophage-expressed gene 1 protein	comp10756_c0_seq1	113.785	-2.18521	0.0107769	Q2KJC3	4e-79	Bos taurus
Macrophage-expressed gene 1 protein	comp7531_c0_seq1	163.879	-1.64028	0.0473471	A1L314	1e-34	Mus musculus
Malate synthase	comp918_c0_seq1	1497.79	1.49477	0.0332935	P95329	2e-133	Myxococcus xanthus DK 1622
MAM domain-containing glycosylphosphatidylinositol anchor protein 1	comp13930_c0_seq1	71.8681	3.19871	0.00323269	Q0WYX8	2e-23	Gallus gallus
MAM domain-containing protein 2	comp7866_c0_seq1	114.326	1.69409	0.018511	Q7Z304	2e-28	Homo sapiens
MAM domain-containing protein 2	comp41266_c0_seq1	12.4583	4.65369	0.00183225	Q8CG85	1e-10	Mus musculus
Matrix metalloproteinase-16	comp5262_c0_seq1	209.794	5.69202	3.49e-07	P51512	1e-20	Homo sapiens
Matrix metalloproteinase-19	comp34318_c0_seq1	29.8878	3.17955	1.06e-06	Q99542	2e-37	Homo sapiens
Matrix metalloproteinase-24	comp596_c0_seq1	1921.77	3.63457	0.000131823	Q99PW6	7e-33	Rattus norvegicus
Matrix metalloproteinase-25	comp1490_c0_seq1	3505	2.35755	0.00511219	Q3U435	1e-86	Mus musculus
Matrix metalloproteinase-25	comp13860_c0_seq1	406.423	3.684	2.69e-16	Q3U435	7e-66	Mus musculus
Max dimerization protein 1	comp2910_c0_seq1	820.187	2.34407	4.62e-06	P50538	2e-18	Mus musculus
Meiotically up-regulated gene 158 protein	comp16816_c0_seq1	49.8306	1.88252	0.00406904	O94632	2e-05	Schizosaccharomyces pombe 972h-
Melanocyte-stimulating hormone receptor	comp8271_c0_seq1	256.852	1.60989	0.0127793	P55167	1e-14	Gallus gallus
Melanocyte-stimulating hormone receptor	comp28553_c0_seq1	42.9711	2.88712	5e-06	P55167	7e-09	Gallus gallus
Melanocyte-stimulating hormone receptor	comp56465_c0_seq1	15.8782	3.59921	2.04e-06	P56447	1e-13	Ovibos moschatus
Melanopsin-B	comp42732_c0_seq1	22.9439	2.55513	0.0152902	O57422	8e-16	Xenopus laevis
Melatonin receptor type 1A	comp41925_c0_seq1	26.5993	2.10073	0.00606634	P49217	4e-26	Phodopus sungorus
Membrane-associated guanylate kinase, WW and PDZ domain-containing protein 2	comp7103_c0_seq1	209.423	1.45192	0.0440425	Q86UL8	2e-37	Homo sapiens
Metabotropic glutamate receptor-like protein Q	comp33583_c0_seq1	16.624	-2.39373	0.0437357	Q54K09	0.008	Dictyostelium discoideum
Methionine aminopeptidase 1D, mitochondrial	comp9143_c0_seq1	89.2678	1.66826	0.00915377	Q4VBS4	2e-77	Danio rerio
Methionyl-tRNA synthetase, cytoplasmic	comp6543_c0_seq1	374.938	-2.53666	0.00179874	Q6PF21	0	Xenopus laevis
Minor histocompatibility antigen H13	comp1740_c0_seq1	435.488	1.38292	0.0388236	Q8TCT9	1e-23	Homo sapiens
Misshapen-like kinase 1	comp4826_c0_seq1	179.992	3.59228	1.32e-09	Q8N4C8	0.0008	Homo sapiens
Mitochondrial carnitine/acylcarnitine carrier protein	comp5383_c0_seq1	60.8476	1.83648	0.00714798	P97521	8e-32	Rattus norvegicus
Mitochondrial carnitine/acylcarnitine carrier protein	comp2385_c0_seq1	404.472	2.10162	0.000125518	Q9Z2Z6	2e-59	Mus musculus
Mitochondrial dicarboxylate carrier	comp7396_c0_seq1	188.397	2.11943	2.17e-05	Q9UBX3	1e-78	Homo sapiens
Mitochondrial dynamic protein MID51	comp14165_c0_seq1	68.5687	1.641	0.00874231	Q5XIS8	5e-15	Rattus norvegicus
Mitochondrial uncoupling protein 3	comp5552_c0_seq1	279.159	1.94148	0.000283614	O77792	5e-80	Bos taurus
Mitogen-activated protein kinase 6	comp1447_c0_seq1	1374.03	1.77984	0.00550147	Q61532	3e-41	Mus musculus
Mitogen-activated protein kinase 6	comp3406_c0_seq1	280.437	1.91896	0.0382122	P27704	1e-21	Rattus norvegicus
Monocarboxylate transporter 10	comp7722_c0_seq1	275.084	1.64949	0.0209729	A1L1W9	5e-50	Danio rerio
Monocarboxylate transporter 10	comp5638_c0_seq1	425.83	1.85139	0.000483642	A1L1W9	2e-65	Danio rerio
Monocarboxylate transporter 10	comp4142_c0_seq1	309.826	2.08635	5.79e-05	Q91Y77	6e-45	Rattus norvegicus
Monocarboxylate transporter 10	comp12430_c0_seq1	77.8782	2.51532	1.68e-05	A1L1W9	1e-28	Danio rerio
Mothers against decapentaplegic homolog 4	comp28517_c0_seq1	29.5903	1.92533	0.0280609	Q13485	5e-48	Homo sapiens
Mothers against decapentaplegic homolog 4	comp27497_c0_seq1	46.8717	2.11818	0.021755	P97471	2e-36	Mus musculus
Multidrug resistance protein 1	comp2158_c0_seq1	765.262	2.21611	0.00104295	P21448	2e-172	Cricetulus griseus
Multidrug resistance-associated protein 1	comp28087_c0_seq1	33.667	-2.17318	0.0175371	Q8HXQ5	3e-62	Bos taurus
Multidrug resistance-associated protein 4	comp12840_c0_seq1	838.704	3.5307	4.64e-05	O15439	3e-167	Homo sapiens
Multidrug resistance-associated protein 4	comp17724_c0_seq1	206.664	3.60537	5.94e-06	O15439	1e-38	Homo sapiens
Multiple epidermal growth factor-like domains protein 6	comp28747_c0_seq1	32.2816	-3.49249	0.0148423	O75095	3e-65	Homo sapiens
Multiple epidermal growth factor-like domains protein 6	comp2000_c0_seq1	1215.24	1.99163	0.000142297	Q80V70	2e-71	Mus musculus
Multiple epidermal growth factor-like domains protein 6	comp2228_c0_seq1	285.807	2.03306	0.000236627	O75095	2e-12	Homo sapiens
Multiple epidermal growth factor-like domains protein 6	comp11592_c0_seq1	543.062	2.12287	0.0265824	O88281	1e-08	Rattus norvegicus
Muscle, skeletal receptor tyrosine-protein kinase	comp6628_c0_seq1	552.055	1.7162	0.00527789	O15146	1e-54	Homo sapiens
Myosin light chain kinase, smooth muscle	comp25520_c0_seq1	154.55	2.3197	2.13e-05	Q28824	2e-63	Bos taurus
Myosin-2 essential light chain	comp1011_c0_seq1	621.593	1.51805	0.0063738	P54357	5e-37	Drosophila melanogaster
Myosin-9	comp10732_c0_seq1	615.141	3.05141	6.09e-11	P14105	9e-12	Gallus gallus
NACHT and WD repeat domain-containing protein 1	comp47457_c0_seq1	24.298	2.29007	0.00371711	A6H603	9e-05	Mus musculus
NACHT and WD repeat domain-containing protein 1	comp32671_c0_seq1	47.2317	2.53734	0.000252703	Q149M9	4e-46	Homo sapiens
NADH dehydrogenase [ubiquinone] 1 alpha subcomplex subunit 4	comp1154_c0_seq1	1264.49	3.57703	5.83e-05	Q62425	1e-10	Mus musculus
NADH-ubiquinone oxidoreductase chain 1	comp11482_c0_seq1	96.1749	2.44054	5.28e-06	Q37556	1e-125	Metridium senile
NADH-ubiquinone oxidoreductase chain 4	comp5165_c0_seq1	296.461	2.8579	1.45e-09	O47497	3e-172	Metridium senile
Neural cell adhesion molecule 1	comp24872_c0_seq1	28.7617	1.89702	0.0147155	P13590	6e-11	Gallus gallus
Neural cell adhesion molecule 2	comp2557_c0_seq1	557.992	1.80025	0.0388236	O15394	0.0003	Homo sapiens
Neurocalcin homolog	comp13128_c0_seq1	69.0364	-5.02192	1.53e-05	P42325	3e-59	Drosophila melanogaster
Neurofibromin	comp11302_c0_seq1	360.548	1.58626	0.0123616	P97526	3e-116	Rattus norvegicus
Neurogenic locus Notch protein	comp9197_c0_seq1	223.678	-4.43464	0.00126638	P07207	7e-30	Drosophila melanogaster
Neurogenic locus Notch protein	comp14421_c0_seq1	119.452	2.83918	3.75e-08	P07207	4e-25	Drosophila melanogaster
Neuroglian	comp1764_c0_seq1	3148.68	2.64085	1.37e-07	P20241	1e-79	Drosophila melanogaster
Neuromedin-K receptor	comp14388_c0_seq1	139.176	2.56536	0.0117025	P30098	1e-13	Cavia porcellus
Neuronal acetylcholine receptor subunit alpha-7	comp15749_c0_seq1	79.4445	1.61554	0.00550237	P22770	3e-49	Gallus gallus
Neuropeptide FF receptor 2	comp39906_c0_seq1	59.395	2.65563	4.66e-06	Q9EQD2	4e-37	Rattus norvegicus
Neuropeptide Y receptor	comp13187_c0_seq1	281.856	2.41456	7.21e-07	P25931	6e-27	Drosophila melanogaster
Neuroplastin	comp1418_c0_seq1	557.085	-2.06603	0.0166469	P97300	0.0008	Mus musculus
Neurotrypsin	comp31234_c0_seq1	11.3355	-2.28295	0.048928	Q5G267	4e-10	Macaca mulatta
Neutrophil cytosol factor 2	comp12224_c0_seq1	220.492	2.66454	1.41e-07	O70145	7e-27	Mus musculus
NFX1-type zinc finger-containing protein 1	comp18211_c0_seq1	58.1202	-2.31915	0.0289797	Q9P2E3	0.0003	Homo sapiens
Nuclear pore complex protein Nup153	comp799_c0_seq1	662.065	1.35591	0.0480241	P49791	2e-25	Rattus norvegicus
Nuclear speckle splicing regulatory protein 1	comp30487_c0_seq1	42.7019	1.80349	0.00051025	Q568R1	0.0006	Danio rerio
Obscurin	comp86099_c0_seq1	4.5295	-100000	0.00495354	Q5VST9	0.0003	Homo sapiens
Olfactomedin-like protein 2A	comp4288_c0_seq1	25.1427	-5.56264	3.16e-07	Q8BHP7	3e-10	Mus musculus
Olfactomedin-like protein 2A	comp733_c0_seq1	312.618	-2.1314	0.00947137	Q8BHP7	2e-37	Mus musculus
Oligopeptidase A	comp30218_c0_seq1	39.0907	1.83997	0.0218223	P27237	5e-47	Salmonella enterica subsp. enterica serovar Typhimurium
Oncoprotein-induced transcript 3 protein	comp11115_c0_seq1	37.4054	-2.12149	0.0134183	Q8R4V5	8e-11	Mus musculus
Oncoprotein-induced transcript 3 protein	comp2217_c0_seq1	804.767	-1.74935	0.0425913	Q29RU2	6e-36	Bos taurus
Oncoprotein-induced transcript 3 protein	comp3793_c0_seq1	215.61	-1.53519	0.00751295	Q8R4V5	5e-30	Mus musculus
Oncoprotein-induced transcript 3 protein	comp34286_c0_seq1	25.4498	2.75534	8.47e-05	Q6V0K7	3e-18	Rattus norvegicus
Oncoprotein-induced transcript 3 protein	comp14710_c0_seq1	70.9536	5.15226	1.17e-22	Q6V0K7	4e-16	Rattus norvegicus
Oxysterol-binding protein-related protein 2	comp19002_c0_seq1	255.708	1.5311	0.0288733	Q9H1P3	3e-121	Homo sapiens
Paired box protein Pax-9	comp46868_c0_seq1	18.4265	3.0209	4.22e-05	P55166	3e-32	Gallus gallus
Pancreatic lipase-related protein 2	comp2608_c0_seq1	244.189	2.88982	0.0259994	P81139	6e-47	Cavia porcellus
Pancreatic lipase-related protein 2	comp17326_c0_seq1	19.561	3.04052	0.0153369	P54318	0.006	Rattus norvegicus
Pancreatic secretory granule membrane major glycoprotein GP2	comp1341_c0_seq1	402.251	5.79352	2.09e-14	P25291	3e-25	Canis lupus familiaris
Pancreatic triacylglycerol lipase	comp1151_c0_seq1	1874.19	4.23344	4.6e-18	Q6P8U6	3e-39	Mus musculus
Pantetheinase	comp10423_c0_seq1	92.4057	-2.07687	0.0135398	Q9Z0K8	2e-100	Mus musculus
Patched domain-containing protein 3	comp5116_c0_seq1	271.717	-1.60779	0.0258463	Q0EEE2	1e-30	Mus musculus
Pathogen-related protein	comp3573_c0_seq1	456.689	8.28455	0.0038776	P16273	6e-29	Hordeum vulgare
Peptidyl-prolyl cis-trans isomerase FKBP14	comp3112_c0_seq1	117.911	1.32413	0.0492126	Q5R941	2e-31	Pongo abelii
Peroxidasin homolog	comp261_c0_seq1	11351.4	4.96115	9.16e-17	Q1ENI8	9e-64	Caenorhabditis elegans
Peroxidasin homolog	comp312_c0_seq1	6114.41	6.59667	3.07e-18	Q92626	7e-78	Homo sapiens
Peroxidasin-like protein	comp7005_c0_seq1	121.818	3.18109	3.18e-06	A1KZ92	1e-19	Homo sapiens
Peroxisomal membrane protein 11B	comp1444_c0_seq1	833.705	2.42167	0.0193746	Q5RFI0	4e-23	Pongo abelii
Phosphoenolpyruvate carboxykinase [GTP]	comp7032_c0_seq1	75.4883	3.37155	0.0094887	Q7WAK8	5e-19	Bordetella parapertussis
Phosphoenolpyruvate carboxykinase [GTP], mitochondrial	comp708_c0_seq1	2581.21	2.95923	0.00832322	Q8BH04	5e-50	Mus musculus
Phosphoenolpyruvate carboxykinase [GTP], mitochondrial	comp3824_c0_seq1	473.262	3.45474	0.00034697	Q16822	3e-103	Homo sapiens
Phosphoenolpyruvate carboxykinase [GTP], mitochondrial	comp6322_c0_seq1	299.313	3.62817	7.07e-05	Q8BH04	6e-49	Mus musculus
Phosphoenolpyruvate carboxykinase [GTP], mitochondrial	comp3165_c0_seq1	320.854	3.77825	5.02e-07	Q8BH04	5e-21	Mus musculus
Phospholipase DDHD1	comp11068_c0_seq1	411.052	2.28115	3.61e-06	Q8NEL9	9e-33	Homo sapiens
Phthiocerol synthesis polyketide synthase type I PpsC	comp1452_c0_seq1	3981.63	-2.2818	0.00348419	P96202	1e-32	Mycobacterium tuberculosis
Pituitary tumor-transforming gene 1 protein-interacting protein	comp600_c0_seq1	940.619	1.43637	0.0471736	Q5NVI6	5e-19	Pongo abelii
Placenta-specific gene 8 protein	comp270_c0_seq1	834.395	1.45437	0.0168395	Q5REK4	7e-15	Pongo abelii
Plasma membrane calcium-transporting ATPase 4	comp27597_c0_seq1	96.1461	-2.17942	0.0388236	P23634	1e-70	Homo sapiens
Plasminogen	comp3108_c0_seq1	317.237	2.04153	0.00560283	Q01177	4e-44	Rattus norvegicus
Polyubiquitin	comp24362_c0_seq1	19.8244	5.72247	9.41e-15	P22589	7e-30	Phytophthora infestans
Polyubiquitin	comp42557_c0_seq1	2148.03	11.784	5.29e-13	P0CG82	4e-29	Tetrahyme pyriformis
Post-GPI attachment to proteins factor 2	comp17687_c0_seq1	38.9169	1.89918	0.00560283	Q2ABP2	3e-40	Cricetulus griseus
Pregnancy zone protein	comp1293_c0_seq1	2403.47	1.61021	0.0132904	P20742	3e-138	Homo sapiens
Proactivator polypeptide	comp944_c0_seq1	146.651	-2.28972	0.0442846	P07602	6e-05	Homo sapiens
Probable calcium-binding protein CML13	comp6300_c0_seq1	640.074	5.37281	3.99e-06	Q7F0J0	0.0001	Oryza sativa Japonica Group
Probable calcium-binding protein CML15	comp5467_c0_seq1	823.768	4.24611	0.00835027	Q9FZ75	5e-06	Arabidopsis thalia
Probable glycoprotein hormone G-protein coupled receptor	comp15298_c0_seq1	363.592	3.10374	4.48e-11	P35409	7e-21	Anthopleura elegantissima
Probable G-protein coupled receptor 112	comp10488_c0_seq1	442.55	1.43364	0.0422564	B7ZCC9	1e-46	Mus musculus
Probable G-protein coupled receptor 112	comp14665_c0_seq1	238.631	1.71337	0.0134693	Q8IZF6	1e-50	Homo sapiens
Probable G-protein coupled receptor 133	comp12677_c0_seq1	412.29	4.19733	0.000146057	Q6QNK2	8e-23	Homo sapiens
Probable RNA-directed DNA polymerase from transposon X-element	comp10741_c0_seq1	143.251	3.01779	0.000276733	Q9NBX4	0.0006	Drosophila melanogaster
Probable Xaa-Pro aminopeptidase P	comp35529_c0_seq1	18.7552	-4.18679	0.0350519	C5FHR9	5e-29	Arthroderma otae CBS 113480
Profilin	comp37136_c0_seq1	22.7004	6.02087	0.0290297	P18321	5e-14	Clypeaster japonicus
Profilin	comp20045_c0_seq1	41.6606	6.55152	6.98e-24	P18321	3e-15	Clypeaster japonicus
Profilin-2	comp79639_c0_seq1	15.9542	-100000	1.14e-06	P19984	9e-13	Acanthamoeba castellanii
Prohibitin-2	comp1287_c0_seq1	411.042	1.92377	0.000914496	Q54Q31	0.005	Dictyostelium discoideum
Proline-rich transmembrane protein 1	comp1440_c0_seq1	252.871	2.3346	1.36e-05	Q6MG82	8e-13	Rattus norvegicus
Prominin-1-A	comp977_c0_seq1	1971.76	1.71239	0.0347603	Q9W735	1e-80	Danio rerio
Pro-Pol polyprotein	comp31438_c0_seq1	38.638	1.62539	0.0370493	P27401	0.0002	Simian foamy virus (TYPE 3 / STRAIN LK3)
Pro-Pol polyprotein	comp18394_c0_seq1	144.437	2.4766	7.28e-07	P27401	0.0004	Simian foamy virus (TYPE 3 / STRAIN LK3)
Protein AMN1 homolog	comp22506_c0_seq1	45.8607	1.49332	0.0367841	Q5R8X9	3e-33	Pongo abelii
Protein APCDD1	comp2341_c0_seq1	179.458	2.04601	0.0209729	Q5R2J4	8e-38	Pelodiscus sinensis
Protein CBFA2T3	comp14127_c0_seq1	69.6878	6.52972	2.74e-13	O75081	1e-06	Homo sapiens
Protein dachsous	comp24866_c0_seq1	190.589	3.86938	0.0231477	Q24292	7e-74	Drosophila melanogaster
Protein ECT2	comp11098_c0_seq1	278.055	1.8953	0.00997178	Q9H8V3	3e-21	Homo sapiens
Protein ETHE1, mitochondrial	comp3957_c0_seq1	274.454	2.58951	7.64e-08	Q3T094	6e-67	Bos taurus
Protein G7c	comp2293_c0_seq1	506.252	1.88472	0.000194891	Q9JHA8	1e-13	Mus musculus
Protein G7c	comp15121_c0_seq1	72.5554	4.21898	7.82e-17	Q9Y334	5e-05	Homo sapiens
Protein jagged-1	comp2380_c0_seq1	395.908	-2.52769	0.0051677	Q9QXX0	5e-31	Mus musculus
Protein kinase C delta type	comp13482_c0_seq1	116.574	1.61205	0.0139246	Q05655	7e-76	Homo sapiens
Protein kinase C delta type	comp11077_c0_seq1	198.821	1.69003	0.00822895	P09215	1e-108	Rattus norvegicus
Protein patched homolog 1	comp19482_c0_seq1	87.2157	-2.2108	0.0258429	Q90693	4e-122	Gallus gallus
Protein patched homolog 1	comp16115_c0_seq1	131.288	-2.06213	0.0483521	Q90693	7e-114	Gallus gallus
Protein phosphatase 1 regulatory subunit 12A	comp1661_c0_seq1	654.379	1.98081	0.00114028	Q90623	1e-11	Gallus gallus
Protein phosphatase 1 regulatory subunit 3B	comp3761_c0_seq1	232.853	1.64157	0.00506389	A6QNP3	2e-23	Bos taurus
Protein phosphatase 1 regulatory subunit 3C	comp3796_c0_seq1	1124.12	3.24307	0.000941585	Q6DDQ5	2e-18	Xenopus laevis
Protein rolling stone	comp23202_c0_seq1	58.614	4.11126	0.00188386	O44252	2e-13	Drosophila melanogaster
Protein rolling stone	comp26804_c0_seq1	116.871	5.41974	0.01364	O44252	5e-09	Drosophila melanogaster
Protein serrate	comp7904_c0_seq1	51.5505	-2.74904	0.00335021	P18168	3e-13	Drosophila melanogaster
Protein sprouty homolog 2	comp3255_c0_seq1	617.995	3.35421	0.000108058	Q5R959	1e-18	Pongo abelii
Protein stu1	comp1269_c0_seq1	755.343	1.54935	0.00812269	Q2UCC9	0.001	Aspergillus oryzae RIB40
Protein Wnt-8b	comp1774_c0_seq1	694.135	2.96322	0.000222012	P51029	3e-60	Danio rerio
Protocadherin Fat 2	comp21065_c0_seq1	37.5642	-2.48183	0.0231774	Q5F226	5e-09	Mus musculus
Protocadherin Fat 4	comp63818_c0_seq1	21.3283	1.6951	0.0425913	Q2PZL6	3e-25	Mus musculus
Protocadherin Fat 4	comp65595_c0_seq1	17.3587	1.88845	0.0360502	Q6V0I7	2e-26	Homo sapiens
Protocadherin Fat 4	comp52500_c0_seq1	45.5236	2.17475	0.00100734	Q2PZL6	1e-38	Mus musculus
Protocadherin Fat 4	comp36613_c0_seq1	114.371	2.22324	4.17e-05	Q2PZL6	1e-82	Mus musculus
Protocadherin Fat 4	comp46716_c0_seq1	22.0286	2.52776	0.00101294	Q2PZL6	7e-18	Mus musculus
Protocadherin Fat 4	comp51596_c0_seq1	25.1655	2.63356	0.000165098	Q6V0I7	2e-27	Homo sapiens
Protocadherin Fat 4	comp24114_c0_seq1	170.704	3.59995	0.00259367	Q6V0I7	3e-13	Homo sapiens
Proto-oncogene tyrosine-protein kinase LCK	comp24617_c0_seq1	34.4496	3.21304	0.000411581	Q95KR7	2e-09	Saimiri sciureus
Proto-oncogene tyrosine-protein kinase receptor Ret	comp3697_c0_seq1	1148.17	-2.71391	0.0204282	P07949	4e-57	Homo sapiens
Proto-oncogene tyrosine-protein kinase receptor Ret	comp64061_c0_seq1	4.01126	6.15169	0.000295135	P07949	3e-36	Homo sapiens
Putative actin-22	comp5114_c0_seq1	242.645	1.55614	0.0269831	Q553U6	4e-23	Dictyostelium discoideum
Putative adenosylhomocysteinase 3	comp875_c0_seq1	1136.69	1.27562	0.0454961	Q68FL4	4e-166	Mus musculus
Putative bifunctional amine oxidase DDB_G0291301	comp26330_c0_seq1	48.3479	-1.98384	0.0145941	Q54EW2	5e-27	Dictyostelium discoideum
Putative endonuclease BB_0411	comp2099_c0_seq1	310.059	5.13696	0.00148328	O51372	0.0002	Borrelia burgdorferi
Putative insulin-like peptide receptor	comp6995_c0_seq1	587.198	1.66554	0.0136972	Q25197	0	Hydra vulgaris
Putative L-amino-acid oxidase YobN	comp3443_c0_seq1	569.177	-2.04565	0.00836599	O34363	1e-22	Bacillus subtilis
Putative leucine-rich repeat-containing protein DDB_G0290503	comp66585_c0_seq1	14.7094	2.89032	0.00544981	Q54G05	0.009	Dictyostelium discoideum
Putative potassium channel protein yugO	comp31566_c0_seq1	34.9383	-2.00619	0.018452	Q795M8	3e-06	Bacillus subtilis
Putative tyrosinase-like protein tyr-3	comp8980_c0_seq1	137.459	1.32999	0.0280609	Q19673	7e-05	Caenorhabditis elegans
Putative tyrosinase-like protein tyr-3	comp11216_c0_seq1	173.184	1.89183	0.00110326	Q19673	4e-06	Caenorhabditis elegans
Putative uncharacterized protein ART2	comp772_c0_seq1	3700.55	5.18384	7.54e-07	Q8TGM7	4e-14	Saccharomyces cerevisiae S288c
Putative ZP domain-containing protein LOC729800	comp18977_c0_seq1	47.9313	2.04976	0.0034419	A6NLB4	0.006	Homo sapiens
Pyroglutamylated RFamide peptide receptor	comp11839_c0_seq1	96.8909	2.92347	0.0159616	P83861	7e-13	Mus musculus
Pyroglutamylated RFamide peptide receptor	comp7341_c0_seq1	402.604	3.38876	2.94e-11	P83861	2e-18	Mus musculus
Rabenosyn-5	comp10794_c0_seq1	229.309	1.96022	0.00373013	Q9H1K0	2e-65	Homo sapiens
Ran GTPase-activating protein 1	comp45840_c0_seq1	18.7465	1.90936	0.0183606	P46061	2e-07	Mus musculus
Rap1 GTPase-activating protein 2	comp11692_c0_seq1	149.245	1.59451	0.0164232	Q5ZMV8	2e-51	Gallus gallus
Ras-related and estrogen-regulated growth inhibitor	comp6878_c0_seq1	318.438	2.83741	2.61e-09	Q8R367	2e-23	Mus musculus
Ras-related protein Rab-13	comp15469_c0_seq1	172.268	2.17767	2.97e-05	P51153	2e-54	Homo sapiens
Receptor-type tyrosine-protein phosphatase alpha	comp11058_c0_seq1	21.5741	-2.22716	0.0177967	Q03348	3e-26	Rattus norvegicus
Receptor-type tyrosine-protein phosphatase delta	comp28627_c0_seq1	32.5027	-2.45761	0.0341337	Q64487	4e-15	Mus musculus
Receptor-type tyrosine-protein phosphatase F	comp19598_c0_seq1	12.2873	-2.47058	0.039137	Q64604	9e-19	Rattus norvegicus
Retinoic acid receptor RXR-alpha	comp11738_c0_seq1	167.962	1.73601	0.004777	P51128	2e-52	Xenopus laevis
Retinoid isomerohydrolase	comp15953_c0_seq1	112.122	-2.09333	0.0273257	Q9XT71	4e-83	Chlorocebus aethiops
Rho-related protein racA	comp11859_c0_seq1	172.928	2.98804	0.00738694	P34147	9e-21	Dictyostelium discoideum
Roundabout homolog 1	comp10788_c0_seq1	124.012	2.64509	9.5e-07	O89026	4e-18	Mus musculus
Roundabout homolog 3	comp15564_c0_seq1	51.2007	3.87143	1.48e-07	Q9Z2I4	2e-10	Mus musculus
Roundabout homolog 3	comp5926_c0_seq1	159.347	4.78771	6.66e-09	Q9Z2I4	2e-06	Mus musculus
SAM pointed domain-containing Ets transcription factor	comp1529_c0_seq1	1246.39	2.68494	0.000343083	Q9WTP3	6e-15	Mus musculus
Scavenger receptor class A member 5	comp41322_c0_seq1	15.5649	-2.38118	0.0276895	A5PJQ2	7e-19	Bos taurus
Scavenger receptor class F member 1	comp31039_c0_seq1	103.68	2.17339	0.020749	Q5ND28	1e-07	Mus musculus
SCO-spondin	comp553_c0_seq1	861.056	-2.98327	0.000148898	Q8CG65	1e-13	Mus musculus
SCO-spondin	comp5928_c0_seq1	164.753	7.19978	1.36e-14	A2VEC9	1e-12	Homo sapiens
Secreted frizzled-related protein 1	comp2434_c0_seq1	989.745	6.1392	6.87e-42	Q9DEQ4	6e-16	Gallus gallus
Segmentation protein paired	comp13537_c0_seq1	44.9752	3.74365	8.99e-08	P06601	1e-20	Drosophila melanogaster
Serine protease 23	comp19777_c0_seq1	61.5137	1.5672	0.0142557	Q1LZE9	4e-20	Bos taurus
Serine/arginine repetitive matrix protein 2	comp8375_c0_seq1	506.082	1.44862	0.0209729	Q8BTI8	0.001	Mus musculus
Serine/threonine-protein kinase PLK4	comp24091_c0_seq1	48.3103	1.58389	0.0196043	A7SNN5	2e-54	Nematostella vectensis
Serine/threonine-protein kinase PRP4 homolog	comp8815_c0_seq1	125.545	1.50472	0.0493767	Q5R814	3e-06	Pongo abelii
SERTA domain-containing protein 2	comp3817_c0_seq1	587.762	2.16595	4.47e-05	Q9JJG5	0.003	Mus musculus
SH3 and PX domain-containing protein 2A	comp7707_c0_seq1	385.685	3.58144	0.00192654	Q5TCZ1	3e-07	Homo sapiens
SH3 and PX domain-containing protein 2B	comp4168_c0_seq1	1024.65	3.31676	0.0028954	A2AAY5	1e-32	Mus musculus
Short transient receptor potential channel 3	comp38355_c0_seq1	46.7129	6.07625	0.000789422	Q13507	1e-06	Homo sapiens
Short transient receptor potential channel 5	comp8821_c0_seq1	1183.64	6.21	5.4e-16	O62852	2e-10	Oryctolagus cuniculus
Short-chain collagen C4	comp2520_c0_seq1	579.58	2.52164	0.00121062	P18503	1e-06	Ephydatia muelleri
Sin3 histone deacetylase corepressor complex component SDS3	comp14386_c0_seq1	163.633	1.72016	0.00492075	A6H6W9	1e-47	Bos taurus
Smoothelin	comp6016_c0_seq1	577.424	1.58058	0.0104875	Q921U8	2e-21	Mus musculus
Sodium- and chloride-dependent creatine transporter 1	comp21339_c0_seq1	26.5153	-2.27177	0.0220561	P28570	8e-77	Rattus norvegicus
Sodium/potassium-transporting ATPase subunit beta-1-interacting protein 1	comp5562_c0_seq1	160.654	1.65247	0.00807561	Q4KMZ8	4e-41	Homo sapiens
Sodium-dependent neutral amino acid transporter B(0)AT3	comp1671_c0_seq1	1099.61	-1.69364	0.0330331	Q96N87	2e-136	Homo sapiens
Solute carrier family 15 member 1	comp17269_c0_seq1	78.9718	-1.61652	0.0291494	Q9JIP7	2e-64	Mus musculus
Solute carrier family 22 member 5	comp23972_c0_seq1	42.0621	-2.34458	0.0132994	O70594	2e-72	Rattus norvegicus
Solute carrier family 26 member 6	comp26336_c0_seq1	44.9209	-1.97279	0.0171575	Q9BXS9	2e-95	Homo sapiens
Spondin-1	comp8113_c0_seq1	279.142	2.33587	1.25e-06	Q9W770	3e-66	Gallus gallus
SPRY domain-containing protein 3	comp31481_c0_seq1	59.9892	6.16095	2.7e-26	Q5RBR6	9e-06	Pongo abelii
Staphylococcal nuclease domain-containing protein 1	comp3070_c0_seq1	738.093	1.47873	0.0251747	Q5REU4	0	Pongo abelii
StAR-related lipid transfer protein 13	comp5525_c0_seq1	379.442	1.62842	0.031336	Q9Y3M8	1e-25	Homo sapiens
Sterile alpha motif domain-containing protein 5	comp11497_c0_seq1	237.149	1.46755	0.0259419	Q3V1H9	3e-14	Mus musculus
Stress-associated endoplasmic reticulum protein 2	comp418_c0_seq1	660.157	1.30404	0.0434146	Q6TAW2	3e-21	Mus musculus
Stromelysin-3	comp16931_c0_seq1	33.476	-2.15773	0.0471736	Q11005	8e-31	Xenopus laevis
Sulfated glycoprotein 1	comp384_c0_seq1	642.596	-2.33761	0.0135398	Q61207	3e-06	Mus musculus
Sulfide:quinone oxidoreductase, mitochondrial	comp2574_c0_seq1	453.282	1.75181	0.000809236	Q9R112	4e-116	Mus musculus
Sushi repeat-containing protein SRPX	comp17845_c0_seq1	53.8496	-1.88401	0.0146486	Q63769	9e-34	Rattus norvegicus
Sushi, von Willebrand factor type A, EGF and pentraxin domain-containing protein 1	comp29703_c0_seq1	12.9305	-2.66397	0.0123616	A2AVA0	2e-26	Mus musculus
Sushi, von Willebrand factor type A, EGF and pentraxin domain-containing protein 1	comp5654_c0_seq1	29.0555	-2.21308	0.0242532	Q4LDE5	3e-06	Homo sapiens
Sushi, von Willebrand factor type A, EGF and pentraxin domain-containing protein 1	comp35690_c0_seq1	32.2979	1.87578	0.025652	P0C6B8	9e-95	Rattus norvegicus
Sushi, von Willebrand factor type A, EGF and pentraxin domain-containing protein 1	comp3613_c0_seq1	463.652	2.91614	0.0054292	Q4LDE5	1e-24	Homo sapiens
Sushi, von Willebrand factor type A, EGF and pentraxin domain-containing protein 1	comp4151_c0_seq1	203.561	3.26482	1.23e-11	P0C6B8	2e-20	Rattus norvegicus
Sushi, von Willebrand factor type A, EGF and pentraxin domain-containing protein 1	comp2132_c0_seq1	91.1581	5.33249	0.00214583	P0C6B8	2e-24	Rattus norvegicus
Synapsin-2	comp29360_c0_seq1	30.273	1.8847	0.0227544	Q63537	8e-36	Rattus norvegicus
Synapsin-2	comp16488_c0_seq1	120.416	2.84102	7.05e-08	Q63537	9e-50	Rattus norvegicus
Synaptotagmin-1	comp5401_c0_seq1	111.832	1.81774	0.00208889	P21707	7e-13	Rattus norvegicus
Synaptotagmin-14	comp9608_c0_seq1	99.609	1.74668	0.0272298	Q8NB59	3e-07	Homo sapiens
Synaptotagmin-15	comp21399_c0_seq1	43.1066	1.84219	0.021755	Q9BQS2	6e-46	Homo sapiens
Synaptotagmin-7	comp8198_c0_seq1	121.864	1.63517	0.013817	Q9R0N7	1e-54	Mus musculus
Synaptotagmin-like protein 4	comp9019_c0_seq1	187.35	1.6289	0.02288	Q96C24	1e-45	Homo sapiens
Tachykinin-like peptides receptor 86C	comp24082_c0_seq1	52.3473	1.71243	0.0457487	P30974	9e-16	Drosophila melanogaster
TBC1 domain family member 25	comp17647_c0_seq1	117.477	2.32428	6.23e-05	A1A5B6	2e-76	Mus musculus
T-box transcription factor TBX20	comp16701_c0_seq1	75.2012	1.78218	0.00166387	Q9UMR3	2e-78	Homo sapiens
T-cell leukemia homeobox protein 2	comp20621_c0_seq1	23.8406	1.70732	0.0225205	Q61663	9e-15	Mus musculus
Tenascin	comp35886_c0_seq1	65.5678	-3.19196	0.000363307	Q80YX1	3e-13	Mus musculus
Tenascin	comp25669_c0_seq1	87.7763	-2.49922	0.00198504	P24821	3e-57	Homo sapiens
Tenascin-R	comp77124_c0_seq1	4.25329	4.17096	0.0118762	Q00546	6e-30	Gallus gallus
Tetraspanin-33	comp2664_c0_seq1	299.169	1.64571	0.0161624	Q3SYV5	6e-25	Bos taurus
Tetratricopeptide repeat protein 13	comp8143_c0_seq1	195.367	1.64487	0.0166929	Q8NBP0	1e-121	Homo sapiens
Tetratricopeptide repeat protein 13	comp6555_c0_seq1	67.848	1.74842	0.0180636	Q8NBP0	7e-26	Homo sapiens
THAP domain-containing protein 1	comp19120_c0_seq1	27.4635	2.27894	0.00339436	Q3T0G1	0.0003	Bos taurus
Thiosulfate sulfurtransferase/rhodanese-like domain-containing protein 1	comp2536_c0_seq1	535.226	3.69824	2.63e-06	Q8NFU3	2e-15	Homo sapiens
Thyroglobulin	comp21632_c0_seq1	27.8789	-2.32983	0.0130153	O08710	3e-07	Mus musculus
Tight junction protein ZO-1	comp10690_c0_seq1	245.169	1.88573	0.000804147	P39447	5e-12	Mus musculus
Tissue factor pathway inhibitor	comp19083_c0_seq1	49.6531	1.77078	0.0280609	P19761	3e-06	Oryctolagus cuniculus
Titin	comp9372_c0_seq1	252.961	4.86953	1.37e-09	Q8WZ42	1e-13	Homo sapiens
TNF receptor-associated factor 3	comp1913_c0_seq1	793.065	2.50519	0.0379915	Q13114	1e-85	Homo sapiens
Toll-like receptor 2	comp19809_c0_seq1	54.3112	1.7116	0.00764426	Q689D1	5e-11	Canis lupus familiaris
Toll-like receptor 6	comp10453_c0_seq1	199.052	4.68711	1.64e-07	Q704V6	3e-11	Bos taurus
Tolloid-like protein 1	comp2980_c0_seq1	217.548	-2.78585	0.000339611	O43897	1e-18	Homo sapiens
Tolloid-like protein 1	comp12444_c0_seq1	139.776	1.94896	0.031336	Q9DER7	1e-151	Gallus gallus
Tolloid-like protein 2	comp23469_c0_seq1	12.2225	-2.88028	0.0315278	O57382	6e-07	Xenopus laevis
Trace amine-associated receptor 8c	comp36504_c0_seq1	37.9944	6.05384	2.3e-21	Q923Y0	3e-05	Rattus norvegicus
Trans-2,3-enoyl-CoA reductase	comp15925_c0_seq1	50.6532	1.44386	0.0309879	Q9NZ01	2e-05	Homo sapiens
Transaldolase	comp728_c0_seq1	601.207	1.3983	0.0280609	Q9EQS0	7e-104	Rattus norvegicus
Transcription factor LBX1	comp10937_c0_seq1	80.8358	-1.95351	0.0247866	Q0P4H6	5e-21	Xenopus (Silura) tropicalis
Transcription initiation factor IIB	comp12655_c0_seq1	114.196	1.66612	0.0161395	P29054	1e-109	Xenopus laevis
Transcriptional repressor tup12	comp23897_c0_seq1	78.1539	2.74363	1.34e-05	Q9UUG8	0.0002	Schizosaccharomyces pombe 972h-
Transient receptor potential cation channel subfamily A member 1	comp18572_c0_seq1	274.564	3.12733	4.27e-11	Q6RI86	7e-51	Rattus norvegicus
Transient receptor potential cation channel subfamily A member 1 homolog	comp9055_c0_seq1	342.378	1.46631	0.0490404	Q18297	1e-84	Caenorhabditis elegans
Transient receptor potential cation channel subfamily M member 3	comp13156_c0_seq1	114.702	-1.81993	0.0382777	Q9HCF6	3e-28	Homo sapiens
Translation initiation factor IF-2	comp17427_c0_seq1	15.5078	3.9715	1.51e-07	C4Z5N7	0.007	Eubacterium eligens ATCC 27750
Transmembrane protein 198	comp19468_c0_seq1	13.4162	-2.51134	0.0258864	Q08E36	4e-09	Bos taurus
Transmembrane protein 198-B	comp9551_c0_seq1	47.0316	-1.83331	0.0425665	Q498W5	0.0004	Danio rerio
Transmembrane protein 229B	comp77616_c0_seq1	2.84793	6.17716	0.0098152	Q8BFQ2	9e-13	Mus musculus
Transmembrane protein 62	comp50014_c0_seq1	11.4045	2.25316	0.0406714	Q0P6H9	5e-50	Homo sapiens
Transmembrane protein 91	comp21636_c0_seq1	59.5941	2.71719	9.09e-08	Q8C581	9e-05	Mus musculus
Trichohyalin	comp4745_c0_seq1	1232.61	1.61904	0.0148203	P37709	2e-07	Oryctolagus cuniculus
Tripartite motif-containing protein 71	comp20297_c0_seq1	204.223	2.17493	3.75e-05	Q2Q1W2	1e-74	Homo sapiens
t-SNARE domain-containing protein 1	comp5742_c0_seq1	335.295	1.41093	0.0149193	Q96NA8	0.002	Homo sapiens
Tubulin alpha chain	comp6550_c0_seq1	717.45	3.97057	1.95e-16	P28287	4e-121	Oxytricha granulifera
Tubulin alpha chain	comp7621_c0_seq1	248.477	10.4399	2.03e-62	P28287	6e-64	Oxytricha granulifera
Tubulin alpha chain	comp16594_c0_seq1	209.84	11.1248	6.24e-60	P41351	7e-53	Tetrahyme thermophila
Tubulin alpha chain	comp24392_c0_seq1	3836.45	13.3677	1.57e-13	P10873	2e-23	Toxoplasma gondii
Tubulin alpha chain	comp17938_c0_seq1	1310.66	14.5351	4.04e-96	Q9ZRB7	2e-13	Triticum aestivum
Tubulin beta chain	comp8422_c0_seq1	191.54	7.89403	2.11e-18	P11857	3e-56	Stylonychia leme
Tubulin beta chain	comp14362_c0_seq1	2344.96	12.9213	1.24e-101	P41352	4e-141	Tetrahyme thermophila
Tubulin beta-1 chain	comp30795_c0_seq1	21.4777	2.62453	9.92e-05	P36221	2e-49	Notothenia neglecta
Tudor domain-containing protein 1	comp10054_c0_seq1	124.264	4.49822	0.00104567	A9CPT4	0.0005	Oryzias latipes
Tumor necrosis factor receptor superfamily member 1A	comp4915_c0_seq1	649.734	1.8259	0.00157118	P19438	1e-06	Homo sapiens
Twisted gastrulation protein homolog 1-A	comp67531_c0_seq1	7.15411	2.50716	0.0499575	Q98T88	5e-23	Xenopus laevis
Type III iodothyronine deiodinase	comp1760_c0_seq1	440.764	1.65469	0.0465598	O42412	3e-36	Gallus gallus
Type III iodothyronine deiodinase	comp30955_c0_seq1	20.746	5.12609	2.58e-06	Q5I3B1	2e-14	Bos taurus
Type III iodothyronine deiodinase	comp40951_c0_seq1	18.3953	5.66686	0.000733089	O42412	4e-22	Gallus gallus
Tyrosine aminotransferase	comp6565_c0_seq1	171.472	-2.63341	0.00473437	Q8QZR1	6e-127	Mus musculus
Tyrosine kinase receptor Cad96Ca	comp6026_c0_seq1	692.065	1.7154	0.00389649	Q9VBW3	7e-74	Drosophila melanogaster
Tyrosine-protein phosphatase non-receptor type 23	comp20690_c0_seq1	51.3114	2.27927	0.000144312	Q9H3S7	6e-57	Homo sapiens
Tyrosine-protein phosphatase non-receptor type 4	comp12262_c0_seq1	252.515	1.76352	0.002692	Q9WU22	8e-110	Mus musculus
Ubiquitin carboxyl-terminal hydrolase 32	comp9614_c0_seq1	174.734	1.49142	0.0480072	Q8NFA0	2e-60	Homo sapiens
Ubiquitin-conjugating enzyme E2 E3	comp14826_c0_seq1	32.9391	1.59303	0.0284815	P52483	1e-30	Mus musculus
Ubiquitin-like protein 1-40S ribosomal protein S27a	comp18859_c0_seq1	1495.3	6.58793	8.33e-07	P37164	1e-07	Caenorhabditis briggsae
Ubiquitin-like protein 3	comp2247_c0_seq1	511.918	1.59067	0.00963416	Q5BJT2	8e-35	Rattus norvegicus
Uncharacterized MFS-type transporter C19orf28	comp19383_c0_seq1	76.4978	1.70657	0.00506799	Q6NUT3	4e-67	Homo sapiens
Uncharacterized MFS-type transporter C19orf28 homolog	comp49907_c0_seq1	24.03	1.6993	0.0321676	Q3U481	2e-22	Mus musculus
Uncharacterized MFS-type transporter C19orf28 homolog	comp6706_c0_seq1	345.661	3.68289	0.0032665	Q3U481	8e-21	Mus musculus
Uncharacterized MFS-type transporter C19orf28 homolog	comp4071_c0_seq1	1167.72	4.01941	0.000300224	Q3U481	2e-12	Mus musculus
Uncharacterized protein 043R	comp10775_c0_seq1	56.4044	1.16861	0.0468094	Q6GZT3	1e-06	Frog virus 3 (isolate Goorha)
Uncharacterized protein C15orf26 homolog	comp8389_c0_seq1	141.286	1.59181	0.0223137	Q568D2	4e-48	Danio rerio
Uncharacterized protein C1orf177 homolog	comp10935_c0_seq1	87.4979	1.99173	0.00142855	B1H283	7e-57	Rattus norvegicus
Uncharacterized protein C1orf88 homolog	comp7680_c0_seq1	132.225	1.57633	0.0353886	Q2TBS4	4e-15	Bos taurus
Uncharacterized protein C20orf152 homolog	comp63748_c0_seq1	9.66713	2.66067	0.0143513	Q9D5U8	1e-05	Mus musculus
Uncharacterized protein C4orf45 homolog	comp25990_c0_seq1	16.8964	2.32516	0.00506799	Q2KIR0	1e-14	Bos taurus
Uncharacterized protein C7orf57	comp3528_c0_seq1	448.373	2.36035	3.85e-06	Q8NEG2	0.008	Homo sapiens
Uncharacterized protein K02A2.6	comp13645_c0_seq1	122.305	-2.38135	0.0291494	Q09575	1e-09	Caenorhabditis elegans
Uncharacterized protein RP689	comp11916_c0_seq1	83.363	1.67799	0.00620866	Q9ZCN4	4e-08	Rickettsia prowazekii str. Madrid E
Uncharacterized protein TC_0114	comp3085_c0_seq1	2678.99	7.51652	2.16e-09	Q9PLI5	3e-39	Chlamydia muridarum
Uncharacterized protein yvmC	comp6068_c0_seq1	667.432	5.38796	6.81e-10	O34351	0.007	Bacillus subtilis
Universal stress protein A-like protein	comp2237_c0_seq1	253.106	2.53462	4.41e-08	Q8LGG8	2e-11	Arabidopsis thalia
Universal stress protein A-like protein	comp1885_c0_seq1	289.832	2.60396	8.72e-08	Q8LGG8	2e-06	Arabidopsis thalia
Unknown	comp10617_c0_seq1	2.97558	-100000	0.040978	NA	NA	NA
Unknown	comp12223_c0_seq1	3.06575	-100000	0.0364102	NA	NA	NA
Unknown	comp23275_c0_seq1	10.3695	-100000	2.75e-05	NA	NA	NA
Unknown	comp30281_c0_seq1	5.38226	-100000	0.00135302	NA	NA	NA
Unknown	comp30589_c0_seq1	3.07526	-100000	0.0249797	NA	NA	NA
Unknown	comp31599_c0_seq1	3.19876	-100000	0.0255797	NA	NA	NA
Unknown	comp33958_c0_seq1	2.28234	-100000	0.0400935	NA	NA	NA
Unknown	comp34701_c0_seq1	5.50032	-100000	0.00204408	NA	NA	NA
Unknown	comp36930_c0_seq1	12.4341	-100000	3.32e-06	NA	NA	NA
Unknown	comp37283_c0_seq1	7.12336	-100000	0.000399474	NA	NA	NA
Unknown	comp37645_c0_seq1	15.4109	-100000	1.58e-06	NA	NA	NA
Unknown	comp38579_c0_seq1	2.93924	-100000	0.0232597	NA	NA	NA
Unknown	comp40013_c0_seq1	3.16692	-100000	0.0282719	NA	NA	NA
Unknown	comp4011_c0_seq1	32.7909	-100000	1.61e-09	NA	NA	NA
Unknown	comp41323_c0_seq1	3.61048	-100000	0.00946983	NA	NA	NA
Unknown	comp41717_c0_seq1	5.16243	-100000	0.00138084	NA	NA	NA
Unknown	comp4431_c0_seq1	11.441	-100000	1.33e-05	NA	NA	NA
Unknown	comp47520_c0_seq1	5.65759	-100000	0.00127152	NA	NA	NA
Unknown	comp52465_c0_seq1	5.39207	-100000	0.00196027	NA	NA	NA
Unknown	comp53639_c0_seq1	3.32747	-100000	0.0258429	NA	NA	NA
Unknown	comp55298_c0_seq1	11.2148	-100000	2.05e-05	NA	NA	NA
Unknown	comp55778_c0_seq1	4.69203	-100000	0.00270302	NA	NA	NA
Unknown	comp57701_c0_seq1	2.77974	-100000	0.0410347	NA	NA	NA
Unknown	comp59567_c0_seq1	8.96729	-100000	0.000107278	NA	NA	NA
Unknown	comp60888_c0_seq1	3.94689	-100000	0.01364	NA	NA	NA
Unknown	comp66030_c0_seq1	4.37115	-100000	0.00163166	NA	NA	NA
Unknown	comp67387_c0_seq1	8.74563	-100000	0.000127005	NA	NA	NA
Unknown	comp67899_c0_seq1	3.96869	-100000	0.0118871	NA	NA	NA
Unknown	comp71876_c0_seq1	3.98857	-100000	0.00438286	NA	NA	NA
Unknown	comp72662_c0_seq1	3.8144	-100000	0.0162308	NA	NA	NA
Unknown	comp74940_c0_seq1	3.25736	-100000	0.038557	NA	NA	NA
Unknown	comp79746_c0_seq1	3.74116	-100000	0.0136972	NA	NA	NA
Unknown	comp80587_c0_seq1	2.92233	-100000	0.0424967	NA	NA	NA
Unknown	comp80877_c0_seq1	2.74214	-100000	0.0324681	NA	NA	NA
Unknown	comp83349_c0_seq1	6.36494	-100000	0.0011279	NA	NA	NA
Unknown	comp83561_c0_seq1	4.60782	-100000	0.00764426	NA	NA	NA
Unknown	comp84156_c0_seq1	4.35239	-100000	0.00341762	NA	NA	NA
Unknown	comp86419_c0_seq1	13.0897	-100000	5.64e-06	NA	NA	NA
Unknown	comp88270_c0_seq1	11.4832	-100000	1.64e-05	NA	NA	NA
Unknown	comp88710_c0_seq1	4.14831	-100000	0.00929192	NA	NA	NA
Unknown	comp90146_c0_seq1	4.41173	-100000	0.00495354	NA	NA	NA
Unknown	comp90934_c0_seq1	3.628	-100000	0.0234697	NA	NA	NA
Unknown	comp93708_c0_seq1	3.07127	-100000	0.048158	NA	NA	NA
Unknown	comp94833_c0_seq1	3.21199	-100000	0.041398	NA	NA	NA
Unknown	comp95138_c0_seq1	3.59164	-100000	0.0156367	NA	NA	NA
Unknown	comp2821_c0_seq1	505.873	-10.6325	1.14e-18	NA	NA	NA
Unknown	comp60725_c0_seq1	16.1852	-8.15582	6.52e-06	NA	NA	NA
Unknown	comp12079_c0_seq1	12.0498	-7.72871	2.96e-05	NA	NA	NA
Unknown	comp50549_c0_seq1	10.2831	-7.49901	0.000123515	NA	NA	NA
Unknown	comp59615_c0_seq1	10.1092	-7.47429	0.000246193	NA	NA	NA
Unknown	comp23764_c0_seq1	9.22592	-7.34173	0.00026239	NA	NA	NA
Unknown	comp18560_c0_seq1	8.8279	-7.27778	8e-05	NA	NA	NA
Unknown	comp89674_c0_seq1	8.21548	-7.17347	0.00106163	NA	NA	NA
Unknown	comp37032_c0_seq1	8.14614	-7.16117	0.000440038	NA	NA	NA
Unknown	comp17972_c0_seq1	128.215	-6.9827	5.64e-11	NA	NA	NA
Unknown	comp16735_c0_seq1	13.0914	-6.84355	1.11e-05	NA	NA	NA
Unknown	comp40957_c0_seq1	17.0601	-6.84162	1.68e-05	NA	NA	NA
Unknown	comp88327_c0_seq1	6.52225	-6.83833	0.0046136	NA	NA	NA
Unknown	comp32680_c0_seq1	20.8402	-6.66099	7.87e-06	NA	NA	NA
Unknown	comp13260_c0_seq1	16.7279	-6.33337	0.0229319	NA	NA	NA
Unknown	comp18113_c0_seq1	13.0161	-6.14188	0.0204282	NA	NA	NA
Unknown	comp47696_c0_seq1	18.6355	-6.09886	2.49e-05	NA	NA	NA
Unknown	comp6130_c0_seq1	94.5217	-6.08783	0.000900731	NA	NA	NA
Unknown	comp37788_c0_seq1	16.4814	-5.9051	8.07e-06	NA	NA	NA
Unknown	comp37209_c0_seq1	12.0597	-5.85552	0.030003	NA	NA	NA
Unknown	comp11129_c0_seq1	20.0525	-5.81945	5.84e-06	NA	NA	NA
Unknown	comp68459_c0_seq1	3.21304	-5.80604	0.0471736	NA	NA	NA
Unknown	comp18105_c0_seq1	24.2132	-5.72112	2.38e-06	NA	NA	NA
Unknown	comp34116_c0_seq1	4.33781	-5.54808	0.0174071	NA	NA	NA
Unknown	comp88949_c0_seq1	4.20766	-5.50333	0.0443485	NA	NA	NA
Unknown	comp84504_c0_seq1	5.05932	-5.45523	0.0442846	NA	NA	NA
Unknown	comp48269_c0_seq1	4.01735	-5.4353	0.0358434	NA	NA	NA
Unknown	comp84915_c0_seq1	7.3944	-5.32941	0.0443485	NA	NA	NA
Unknown	comp7044_c0_seq1	22.9923	-5.27727	0.00473935	NA	NA	NA
Unknown	comp83824_c0_seq1	8.25562	-5.25173	0.00330016	NA	NA	NA
Unknown	comp20355_c0_seq1	32.6427	-5.22209	5.04e-06	NA	NA	NA
Unknown	comp33222_c0_seq1	3.19773	-5.09897	0.0388236	NA	NA	NA
Unknown	comp26380_c0_seq1	12.9603	-5.03912	0.000527972	NA	NA	NA
Unknown	comp17756_c0_seq1	6.04466	-5.01554	0.0317252	NA	NA	NA
Unknown	comp32127_c0_seq1	26.3342	-4.93664	0.0175013	NA	NA	NA
Unknown	comp13573_c0_seq1	62.6327	-4.92773	4.62e-06	NA	NA	NA
Unknown	comp13607_c0_seq1	25.0798	-4.78769	9.82e-05	NA	NA	NA
Unknown	comp47860_c0_seq1	5.31623	-4.65498	0.0155132	NA	NA	NA
Unknown	comp24782_c0_seq1	20.0196	-4.56838	0.00380469	NA	NA	NA
Unknown	comp35166_c0_seq1	23.5779	-4.51284	0.000151146	NA	NA	NA
Unknown	comp56593_c0_seq1	6.04206	-4.48092	0.0293747	NA	NA	NA
Unknown	comp66741_c0_seq1	5.46474	-4.41493	0.0168833	NA	NA	NA
Unknown	comp75441_c0_seq1	8.41509	-4.35845	0.00173497	NA	NA	NA
Unknown	comp90675_c0_seq1	7.70171	-4.35203	0.0119216	NA	NA	NA
Unknown	comp51938_c0_seq1	5.52486	-4.30258	0.0169666	NA	NA	NA
Unknown	comp3920_c0_seq1	8.89313	-4.28191	0.0295754	NA	NA	NA
Unknown	comp33256_c0_seq1	5.20959	-4.25228	0.0288733	NA	NA	NA
Unknown	comp78724_c0_seq1	4.16647	-4.23387	0.0492738	NA	NA	NA
Unknown	comp20999_c0_seq1	20.8706	-4.217	0.000172274	NA	NA	NA
Unknown	comp11363_c0_seq1	37.7731	-4.21567	0.000145289	NA	NA	NA
Unknown	comp30349_c0_seq1	5.98166	-4.17078	0.0429611	NA	NA	NA
Unknown	comp33393_c0_seq1	6.29146	-4.15384	0.016282	NA	NA	NA
Unknown	comp34860_c0_seq1	17.1951	-4.12644	0.00251551	NA	NA	NA
Unknown	comp48255_c0_seq1	5.12897	-4.04723	0.0480072	NA	NA	NA
Unknown	comp23512_c0_seq1	7.28271	-3.83973	0.0382122	NA	NA	NA
Unknown	comp70819_c0_seq1	10.5457	-3.80221	0.00720263	NA	NA	NA
Unknown	comp16364_c0_seq1	48.6662	-3.78185	4.18e-05	NA	NA	NA
Unknown	comp33206_c0_seq1	13.3923	-3.75818	0.000593584	NA	NA	NA
Unknown	comp13604_c0_seq1	107.28	-3.73569	0.000103182	NA	NA	NA
Unknown	comp64947_c0_seq1	9.06381	-3.6958	0.0148641	NA	NA	NA
Unknown	comp22296_c0_seq1	6.51125	-3.68984	0.018452	NA	NA	NA
Unknown	comp59837_c0_seq1	7.44245	-3.66747	0.012296	NA	NA	NA
Unknown	comp3914_c0_seq1	82.9504	-3.64206	0.000474556	NA	NA	NA
Unknown	comp84601_c0_seq1	10.2219	-3.63942	0.0350098	NA	NA	NA
Unknown	comp52305_c0_seq1	13.2767	-3.60626	0.00382736	NA	NA	NA
Unknown	comp39155_c0_seq1	6.21954	-3.60433	0.0296985	NA	NA	NA
Unknown	comp42161_c0_seq1	12.4153	-3.59874	0.00282555	NA	NA	NA
Unknown	comp42641_c0_seq1	15.879	-3.57121	0.0290949	NA	NA	NA
Unknown	comp26281_c0_seq1	16.9369	-3.52954	0.00962711	NA	NA	NA
Unknown	comp43827_c0_seq1	7.80609	-3.52342	0.0234626	NA	NA	NA
Unknown	comp31088_c0_seq1	8.37962	-3.50274	0.0052056	NA	NA	NA
Unknown	comp25674_c0_seq1	15.5277	-3.48583	0.000559597	NA	NA	NA
Unknown	comp9501_c0_seq1	46.0645	-3.47808	0.00222548	NA	NA	NA
Unknown	comp47584_c0_seq1	7.15579	-3.44873	0.0172456	NA	NA	NA
Unknown	comp36340_c0_seq1	6.58338	-3.43533	0.0379618	NA	NA	NA
Unknown	comp44185_c0_seq1	14.2929	-3.38521	0.00183225	NA	NA	NA
Unknown	comp25574_c0_seq1	4.95889	-3.38003	0.0431881	NA	NA	NA
Unknown	comp39178_c0_seq1	6.06732	-3.35685	0.0471532	NA	NA	NA
Unknown	comp39580_c0_seq1	5.36196	-3.35264	0.0320892	NA	NA	NA
Unknown	comp20526_c0_seq1	13.3837	-3.3502	0.0325224	NA	NA	NA
Unknown	comp10215_c0_seq1	53.5106	-3.32499	0.000210127	NA	NA	NA
Unknown	comp5906_c0_seq1	26.2134	-3.32488	0.0015513	NA	NA	NA
Unknown	comp17961_c0_seq1	24.8043	-3.3126	0.00686416	NA	NA	NA
Unknown	comp39801_c0_seq1	8.52957	-3.30664	0.0141355	NA	NA	NA
Unknown	comp738_c0_seq1	445.68	-3.29608	0.00221208	NA	NA	NA
Unknown	comp17_c0_seq1	7555.5	-3.27941	0.027442	NA	NA	NA
Unknown	comp15236_c0_seq1	12.845	-3.27772	0.00388213	NA	NA	NA
Unknown	comp17782_c0_seq1	20.4259	-3.09773	0.000529217	NA	NA	NA
Unknown	comp27949_c0_seq1	68.063	-3.05168	0.000250596	NA	NA	NA
Unknown	comp24418_c0_seq1	16.1449	-3.02844	0.0117025	NA	NA	NA
Unknown	comp12038_c0_seq1	31.9503	-3.01785	0.00163998	NA	NA	NA
Unknown	comp2019_c0_seq1	159.5	-3.01079	0.00027916	NA	NA	NA
Unknown	comp11285_c0_seq1	56.1155	-3.00915	0.0317252	NA	NA	NA
Unknown	comp49644_c0_seq1	8.54273	-2.97242	0.0324721	NA	NA	NA
Unknown	comp13811_c0_seq1	51.5093	-2.95915	0.034135	NA	NA	NA
Unknown	comp1277_c0_seq1	116.091	-2.9527	0.00130063	NA	NA	NA
Unknown	comp33712_c0_seq1	21.3759	-2.95119	0.0182231	NA	NA	NA
Unknown	comp16479_c0_seq1	10.8478	-2.94106	0.0333879	NA	NA	NA
Unknown	comp1937_c0_seq1	45.8821	-2.93973	0.0097096	NA	NA	NA
Unknown	comp40962_c0_seq1	16.2859	-2.90788	0.00592263	NA	NA	NA
Unknown	comp58622_c0_seq1	5.45698	-2.90112	0.0254107	NA	NA	NA
Unknown	comp13712_c0_seq1	50.3952	-2.85337	0.0314621	NA	NA	NA
Unknown	comp54258_c0_seq1	23.0781	-2.84911	0.0305472	NA	NA	NA
Unknown	comp2352_c0_seq1	72.0989	-2.83812	0.010384	NA	NA	NA
Unknown	comp3760_c0_seq1	191.987	-2.81438	0.0106208	NA	NA	NA
Unknown	comp29320_c0_seq1	12.9451	-2.78582	0.0126346	NA	NA	NA
Unknown	comp1985_c0_seq1	152.786	-2.7836	0.00885737	NA	NA	NA
Unknown	comp15917_c0_seq1	31.8188	-2.75424	0.000440876	NA	NA	NA
Unknown	comp11254_c0_seq1	28.0532	-2.73928	0.00334203	NA	NA	NA
Unknown	comp9135_c0_seq1	32.5039	-2.71984	0.0170677	NA	NA	NA
Unknown	comp227_c0_seq1	1250.91	-2.70526	0.000252703	NA	NA	NA
Unknown	comp5336_c0_seq1	68.8537	-2.69411	0.0321779	NA	NA	NA
Unknown	comp10889_c0_seq1	113.181	-2.69045	0.00776404	NA	NA	NA
Unknown	comp29050_c0_seq1	21.3549	-2.64907	0.00880016	NA	NA	NA
Unknown	comp3223_c0_seq1	35.2741	-2.64105	0.0209729	NA	NA	NA
Unknown	comp17353_c0_seq1	50.1874	-2.60537	0.00652108	NA	NA	NA
Unknown	comp45530_c0_seq1	11.5916	-2.57529	0.0299835	NA	NA	NA
Unknown	comp23053_c0_seq1	34.8274	-2.57058	0.00753704	NA	NA	NA
Unknown	comp8600_c0_seq1	130.56	-2.53068	0.00144991	NA	NA	NA
Unknown	comp55516_c0_seq1	12.8926	-2.53062	0.00732143	NA	NA	NA
Unknown	comp32647_c0_seq1	8.20595	-2.51951	0.0494253	NA	NA	NA
Unknown	comp2135_c0_seq1	326.104	-2.51938	0.0162376	NA	NA	NA
Unknown	comp1065_c0_seq1	619.206	-2.49897	0.00254273	NA	NA	NA
Unknown	comp18606_c0_seq1	15.3679	-2.47358	0.0399047	NA	NA	NA
Unknown	comp21676_c0_seq1	32.9911	-2.47221	0.0309794	NA	NA	NA
Unknown	comp5933_c0_seq1	168.482	-2.45001	0.01768	NA	NA	NA
Unknown	comp1600_c0_seq1	263.718	-2.44791	0.0133923	NA	NA	NA
Unknown	comp9215_c0_seq1	27.457	-2.40182	0.0227544	NA	NA	NA
Unknown	comp23081_c0_seq1	47.14	-2.3796	0.00990701	NA	NA	NA
Unknown	comp5189_c0_seq1	61.1349	-2.31693	0.0284064	NA	NA	NA
Unknown	comp5703_c0_seq1	120.45	-2.29892	0.00381771	NA	NA	NA
Unknown	comp20977_c0_seq1	27.6177	-2.29575	0.0147826	NA	NA	NA
Unknown	comp1716_c0_seq1	66.2521	-2.27012	0.0425526	NA	NA	NA
Unknown	comp28888_c0_seq1	42.3539	-2.25665	0.0182416	NA	NA	NA
Unknown	comp23572_c0_seq1	24.1394	-2.25066	0.0128542	NA	NA	NA
Unknown	comp21110_c0_seq1	21.6722	-2.2396	0.022977	NA	NA	NA
Unknown	comp797_c0_seq1	602.072	-2.22383	0.0185836	NA	NA	NA
Unknown	comp23597_c0_seq1	45.7258	-2.21522	0.0289407	NA	NA	NA
Unknown	comp14369_c0_seq1	20.1625	-2.20668	0.0380079	NA	NA	NA
Unknown	comp19656_c0_seq1	37.8174	-2.19788	0.0233631	NA	NA	NA
Unknown	comp2477_c0_seq1	55.7722	-2.1839	0.0189945	NA	NA	NA
Unknown	comp175_c0_seq1	1077.34	-2.1618	0.0221432	NA	NA	NA
Unknown	comp107_c0_seq1	1316.57	-2.14172	0.00928162	NA	NA	NA
Unknown	comp633_c0_seq1	421.333	-2.09376	0.00500376	NA	NA	NA
Unknown	comp19881_c0_seq1	52.985	-2.06821	0.045694	NA	NA	NA
Unknown	comp13393_c0_seq1	21.0352	-2.06331	0.043114	NA	NA	NA
Unknown	comp1455_c0_seq1	445.262	-2.04483	0.0246844	NA	NA	NA
Unknown	comp5718_c0_seq1	89.3817	-1.99615	0.0402058	NA	NA	NA
Unknown	comp5516_c0_seq1	110.543	-1.99475	0.00991139	NA	NA	NA
Unknown	comp9514_c0_seq1	160.439	-1.94247	0.0494368	NA	NA	NA
Unknown	comp34052_c0_seq1	46.07	-1.87625	0.0278513	NA	NA	NA
Unknown	comp806_c0_seq1	796.149	-1.78261	0.0439596	NA	NA	NA
Unknown	comp11693_c0_seq1	61.4529	-1.77014	0.0434117	NA	NA	NA
Unknown	comp26860_c0_seq1	60.9199	-1.76768	0.0292887	NA	NA	NA
Unknown	comp9227_c0_seq1	71.5309	-1.67117	0.0321986	NA	NA	NA
Unknown	comp4619_c0_seq1	121.707	1.19097	0.0434317	NA	NA	NA
Unknown	comp2858_c0_seq1	168.864	1.28525	0.0484401	NA	NA	NA
Unknown	comp3940_c0_seq1	102.932	1.2959	0.0443485	NA	NA	NA
Unknown	comp901_c0_seq1	384.214	1.31437	0.0276744	NA	NA	NA
Unknown	comp2725_c0_seq1	127.805	1.32143	0.0243819	NA	NA	NA
Unknown	comp3653_c0_seq1	143.9	1.33186	0.0330894	NA	NA	NA
Unknown	comp1140_c0_seq1	599.286	1.33849	0.0475447	NA	NA	NA
Unknown	comp2961_c0_seq1	133.761	1.3449	0.0386864	NA	NA	NA
Unknown	comp3612_c0_seq1	51.8237	1.34771	0.0465598	NA	NA	NA
Unknown	comp846_c0_seq1	226.201	1.35999	0.048158	NA	NA	NA
Unknown	comp1351_c0_seq1	113.309	1.37079	0.0425913	NA	NA	NA
Unknown	comp377_c0_seq1	1331.93	1.37169	0.0151493	NA	NA	NA
Unknown	comp1007_c0_seq1	704.903	1.377	0.0119756	NA	NA	NA
Unknown	comp1478_c0_seq1	541.88	1.3951	0.0296535	NA	NA	NA
Unknown	comp20248_c0_seq1	38.7498	1.39672	0.0414235	NA	NA	NA
Unknown	comp8300_c0_seq1	189.71	1.40031	0.0255981	NA	NA	NA
Unknown	comp170_c0_seq1	188.832	1.41052	0.0240561	NA	NA	NA
Unknown	comp3723_c0_seq1	97.6405	1.42654	0.0268415	NA	NA	NA
Unknown	comp16566_c0_seq1	41.1336	1.4293	0.0494368	NA	NA	NA
Unknown	comp2611_c0_seq1	87.9236	1.43609	0.0249009	NA	NA	NA
Unknown	comp6621_c0_seq1	83.6508	1.43886	0.0391541	NA	NA	NA
Unknown	comp3583_c0_seq1	235.878	1.4399	0.021738	NA	NA	NA
Unknown	comp2214_c0_seq1	360.41	1.44031	0.0187004	NA	NA	NA
Unknown	comp5715_c0_seq1	137.738	1.44297	0.0441158	NA	NA	NA
Unknown	comp8306_c0_seq1	98.9663	1.44489	0.0277534	NA	NA	NA
Unknown	comp4548_c0_seq1	164.159	1.45428	0.0143045	NA	NA	NA
Unknown	comp12759_c0_seq1	41.0677	1.4563	0.0282864	NA	NA	NA
Unknown	comp26075_c0_seq1	66.3611	1.464	0.0253993	NA	NA	NA
Unknown	comp13945_c0_seq1	69.5485	1.46544	0.018452	NA	NA	NA
Unknown	comp11612_c0_seq1	192.281	1.4693	0.0206425	NA	NA	NA
Unknown	comp9504_c0_seq1	627.363	1.47536	0.0210507	NA	NA	NA
Unknown	comp2515_c0_seq1	98.1321	1.48434	0.0373787	NA	NA	NA
Unknown	comp3855_c0_seq1	84.3105	1.48437	0.0380922	NA	NA	NA
Unknown	comp7574_c0_seq1	43.1454	1.48447	0.0304111	NA	NA	NA
Unknown	comp7427_c0_seq1	104.527	1.48492	0.0453902	NA	NA	NA
Unknown	comp9997_c0_seq1	39.3294	1.4864	0.0434224	NA	NA	NA
Unknown	comp5628_c0_seq1	57.95	1.48748	0.0442846	NA	NA	NA
Unknown	comp3727_c0_seq1	172.609	1.49339	0.0243066	NA	NA	NA
Unknown	comp2518_c0_seq1	180.554	1.49811	0.022377	NA	NA	NA
Unknown	comp6344_c0_seq1	101.143	1.50283	0.0388637	NA	NA	NA
Unknown	comp9718_c0_seq1	63.9452	1.50649	0.0382777	NA	NA	NA
Unknown	comp7001_c0_seq1	64.4772	1.50824	0.0437152	NA	NA	NA
Unknown	comp934_c0_seq1	236.189	1.51014	0.0174291	NA	NA	NA
Unknown	comp2285_c0_seq1	196.72	1.51392	0.0290241	NA	NA	NA
Unknown	comp3040_c0_seq1	266.999	1.51668	0.0177368	NA	NA	NA
Unknown	comp14827_c0_seq1	62.3739	1.52079	0.0422196	NA	NA	NA
Unknown	comp6406_c0_seq1	49.594	1.52383	0.00342472	NA	NA	NA
Unknown	comp2581_c0_seq1	75.1159	1.52415	0.02288	NA	NA	NA
Unknown	comp2891_c0_seq1	89.8479	1.52967	0.0365469	NA	NA	NA
Unknown	comp6525_c0_seq1	162.464	1.53217	0.029205	NA	NA	NA
Unknown	comp11430_c0_seq1	96.0943	1.53628	0.0330465	NA	NA	NA
Unknown	comp10125_c0_seq1	101.718	1.55241	0.0102744	NA	NA	NA
Unknown	comp2332_c0_seq1	748.998	1.55324	0.0161817	NA	NA	NA
Unknown	comp8398_c0_seq1	148.562	1.55705	0.0145902	NA	NA	NA
Unknown	comp12664_c0_seq1	84.8576	1.55974	0.0380922	NA	NA	NA
Unknown	comp6996_c0_seq1	144.447	1.56309	0.0222812	NA	NA	NA
Unknown	comp7653_c0_seq1	99.7047	1.56309	0.0476519	NA	NA	NA
Unknown	comp7850_c0_seq1	140.539	1.56808	0.0160019	NA	NA	NA
Unknown	comp8819_c0_seq1	86.2355	1.5705	0.0280502	NA	NA	NA
Unknown	comp4572_c0_seq1	159.077	1.57125	0.0171176	NA	NA	NA
Unknown	comp10786_c0_seq1	50.4365	1.5815	0.017905	NA	NA	NA
Unknown	comp10670_c0_seq1	16.6072	1.59034	0.0191911	NA	NA	NA
Unknown	comp3950_c0_seq1	303.826	1.59071	0.022377	NA	NA	NA
Unknown	comp3219_c0_seq1	144.466	1.59476	0.0186509	NA	NA	NA
Unknown	comp4141_c0_seq1	177.264	1.5965	0.021755	NA	NA	NA
Unknown	comp8402_c0_seq1	64.981	1.59774	0.0228229	NA	NA	NA
Unknown	comp5605_c0_seq1	35.7424	1.59946	0.0344471	NA	NA	NA
Unknown	comp1348_c0_seq1	327.738	1.60372	0.00753704	NA	NA	NA
Unknown	comp18485_c0_seq1	57.5718	1.60857	0.0218915	NA	NA	NA
Unknown	comp25317_c0_seq1	13.8368	1.61248	0.029418	NA	NA	NA
Unknown	comp662_c0_seq1	501.517	1.61282	0.0037427	NA	NA	NA
Unknown	comp13671_c0_seq1	51.1261	1.61316	0.0275169	NA	NA	NA
Unknown	comp9983_c0_seq1	380.587	1.61423	0.0337487	NA	NA	NA
Unknown	comp1070_c0_seq1	859.295	1.62738	0.0147942	NA	NA	NA
Unknown	comp9393_c0_seq1	327.777	1.62816	0.0137658	NA	NA	NA
Unknown	comp25844_c0_seq1	22.836	1.62933	0.0391219	NA	NA	NA
Unknown	comp251_c0_seq1	280.095	1.63919	0.00366131	NA	NA	NA
Unknown	comp887_c0_seq1	208.132	1.64458	0.001612	NA	NA	NA
Unknown	comp9881_c0_seq1	114.091	1.65333	0.0061818	NA	NA	NA
Unknown	comp10592_c0_seq1	257.352	1.65464	0.0171493	NA	NA	NA
Unknown	comp14864_c0_seq1	130.168	1.65665	0.00946983	NA	NA	NA
Unknown	comp110_c0_seq1	1343.06	1.65863	0.000566845	NA	NA	NA
Unknown	comp12541_c0_seq1	73.2607	1.65922	0.0174071	NA	NA	NA
Unknown	comp16763_c0_seq1	42.2015	1.66131	0.0342616	NA	NA	NA
Unknown	comp24526_c0_seq1	48.2473	1.67397	0.0225431	NA	NA	NA
Unknown	comp9446_c0_seq1	56.9242	1.67564	0.0142076	NA	NA	NA
Unknown	comp804_c0_seq1	232.999	1.67624	0.0193641	NA	NA	NA
Unknown	comp1170_c0_seq1	296.423	1.67855	0.00120992	NA	NA	NA
Unknown	comp10757_c0_seq1	65.9931	1.68361	0.0339316	NA	NA	NA
Unknown	comp10561_c0_seq1	27.4406	1.68588	0.0248554	NA	NA	NA
Unknown	comp7795_c0_seq1	69.353	1.6917	0.00991139	NA	NA	NA
Unknown	comp12831_c0_seq1	89.0393	1.69341	0.0154626	NA	NA	NA
Unknown	comp3140_c0_seq1	136.021	1.69532	0.0087642	NA	NA	NA
Unknown	comp4245_c0_seq1	203.654	1.69642	0.0439596	NA	NA	NA
Unknown	comp19205_c0_seq1	32.7163	1.70084	0.0116121	NA	NA	NA
Unknown	comp9296_c0_seq1	73.2018	1.70861	0.0137017	NA	NA	NA
Unknown	comp13836_c0_seq1	53.4993	1.711	0.00963471	NA	NA	NA
Unknown	comp12776_c0_seq1	26.7697	1.71301	0.0388417	NA	NA	NA
Unknown	comp4956_c0_seq1	276.944	1.71553	0.00489899	NA	NA	NA
Unknown	comp2506_c0_seq1	167.523	1.71616	0.00165327	NA	NA	NA
Unknown	comp19512_c0_seq1	55.3897	1.71635	0.0143133	NA	NA	NA
Unknown	comp4220_c0_seq1	210.604	1.7231	0.008459	NA	NA	NA
Unknown	comp8314_c0_seq1	419.757	1.72437	0.00515521	NA	NA	NA
Unknown	comp9018_c0_seq1	54.9145	1.72602	0.013701	NA	NA	NA
Unknown	comp19764_c0_seq1	23.8406	1.72788	0.0230376	NA	NA	NA
Unknown	comp660_c0_seq1	461.084	1.73083	0.00267725	NA	NA	NA
Unknown	comp8426_c0_seq1	34.6174	1.7318	0.0177411	NA	NA	NA
Unknown	comp4087_c0_seq1	213.839	1.73633	0.00489899	NA	NA	NA
Unknown	comp11398_c0_seq1	39.9469	1.74041	0.0128023	NA	NA	NA
Unknown	comp26572_c0_seq1	38.7097	1.74084	0.0342261	NA	NA	NA
Unknown	comp18117_c0_seq1	50.8229	1.74105	0.0169987	NA	NA	NA
Unknown	comp12013_c0_seq1	38.9134	1.74191	0.0253993	NA	NA	NA
Unknown	comp467_c0_seq1	349.218	1.74282	0.00188386	NA	NA	NA
Unknown	comp5360_c0_seq1	101.495	1.74404	0.00182016	NA	NA	NA
Unknown	comp8107_c0_seq1	227.147	1.74478	0.0188761	NA	NA	NA
Unknown	comp6845_c0_seq1	71.1518	1.74695	0.0118145	NA	NA	NA
Unknown	comp10659_c0_seq1	35.1329	1.74843	0.0382122	NA	NA	NA
Unknown	comp18878_c0_seq1	38.7624	1.75563	0.00814556	NA	NA	NA
Unknown	comp1100_c0_seq1	156.519	1.75622	0.00169483	NA	NA	NA
Unknown	comp1920_c0_seq1	624.672	1.7582	0.0195614	NA	NA	NA
Unknown	comp13545_c0_seq1	33.0331	1.75923	0.0299891	NA	NA	NA
Unknown	comp21508_c0_seq1	24.9126	1.76007	0.0185872	NA	NA	NA
Unknown	comp2621_c0_seq1	19.5024	1.76583	0.0357618	NA	NA	NA
Unknown	comp21314_c0_seq1	26.6385	1.76799	0.0230138	NA	NA	NA
Unknown	comp4542_c0_seq1	256.382	1.77341	0.00119993	NA	NA	NA
Unknown	comp8595_c0_seq1	96.1807	1.77483	0.00495354	NA	NA	NA
Unknown	comp28196_c0_seq1	24.9253	1.77607	0.0357142	NA	NA	NA
Unknown	comp29763_c0_seq1	44.9066	1.77911	0.0288283	NA	NA	NA
Unknown	comp12095_c0_seq1	212.556	1.77997	0.00185162	NA	NA	NA
Unknown	comp14399_c0_seq1	23.635	1.78145	0.0480582	NA	NA	NA
Unknown	comp31812_c0_seq1	17.4575	1.78476	0.0280609	NA	NA	NA
Unknown	comp5641_c0_seq1	261.353	1.78614	0.00340938	NA	NA	NA
Unknown	comp19714_c0_seq1	17.2825	1.78632	0.0328535	NA	NA	NA
Unknown	comp10864_c0_seq1	46.5871	1.78885	0.013141	NA	NA	NA
Unknown	comp16333_c0_seq1	18.368	1.79413	0.0402863	NA	NA	NA
Unknown	comp5021_c0_seq1	192.827	1.79445	0.00189496	NA	NA	NA
Unknown	comp23071_c0_seq1	15.251	1.79558	0.0486514	NA	NA	NA
Unknown	comp16222_c0_seq1	56.214	1.79896	0.0128855	NA	NA	NA
Unknown	comp11941_c0_seq1	20.8614	1.8016	0.0477595	NA	NA	NA
Unknown	comp39648_c0_seq1	26.7092	1.81378	0.0298415	NA	NA	NA
Unknown	comp4125_c0_seq1	109.054	1.81408	0.00285859	NA	NA	NA
Unknown	comp5481_c0_seq1	14.5405	1.81482	0.0347158	NA	NA	NA
Unknown	comp34389_c0_seq1	39.8723	1.81779	0.00732728	NA	NA	NA
Unknown	comp13570_c0_seq1	59.3212	1.81963	0.0370728	NA	NA	NA
Unknown	comp4840_c0_seq1	231.481	1.82463	0.000912189	NA	NA	NA
Unknown	comp17194_c0_seq1	62.1953	1.83118	0.00377915	NA	NA	NA
Unknown	comp3224_c0_seq1	492.928	1.83169	0.00142194	NA	NA	NA
Unknown	comp18131_c0_seq1	22.224	1.83189	0.0169408	NA	NA	NA
Unknown	comp28873_c0_seq1	18.197	1.83345	0.0238656	NA	NA	NA
Unknown	comp7429_c0_seq1	151.252	1.83538	0.0423274	NA	NA	NA
Unknown	comp3159_c0_seq1	152.467	1.83886	0.00163998	NA	NA	NA
Unknown	comp74238_c0_seq1	10.5795	1.83904	0.0291494	NA	NA	NA
Unknown	comp42344_c0_seq1	17.1551	1.84103	0.0336505	NA	NA	NA
Unknown	comp11701_c0_seq1	56.5532	1.84923	0.0134549	NA	NA	NA
Unknown	comp18186_c0_seq1	43.2426	1.85119	0.00322703	NA	NA	NA
Unknown	comp11646_c0_seq1	38.6462	1.85207	0.0125307	NA	NA	NA
Unknown	comp54715_c0_seq1	28.0432	1.85628	0.0159087	NA	NA	NA
Unknown	comp25031_c0_seq1	31.1522	1.85672	0.0209729	NA	NA	NA
Unknown	comp4103_c0_seq1	80.9921	1.8574	0.00731842	NA	NA	NA
Unknown	comp8511_c0_seq1	150.841	1.85841	0.00142654	NA	NA	NA
Unknown	comp2510_c0_seq1	163.871	1.85943	0.000419739	NA	NA	NA
Unknown	comp15657_c0_seq1	66.4786	1.85954	0.00134365	NA	NA	NA
Unknown	comp14609_c0_seq1	58.9818	1.87474	0.00282998	NA	NA	NA
Unknown	comp26558_c0_seq1	47.012	1.87577	0.00839956	NA	NA	NA
Unknown	comp9773_c0_seq1	57.7174	1.87821	0.0273353	NA	NA	NA
Unknown	comp21691_c0_seq1	33.7493	1.87916	0.0159801	NA	NA	NA
Unknown	comp6445_c0_seq1	220.781	1.88244	0.00155666	NA	NA	NA
Unknown	comp6001_c0_seq1	26.9834	1.88508	0.0093754	NA	NA	NA
Unknown	comp2708_c0_seq1	153.898	1.88969	0.00234902	NA	NA	NA
Unknown	comp17432_c0_seq1	70.2837	1.89105	0.00148328	NA	NA	NA
Unknown	comp5571_c0_seq1	34.8993	1.89216	0.0123616	NA	NA	NA
Unknown	comp9605_c0_seq1	49.9718	1.89647	0.000941585	NA	NA	NA
Unknown	comp10924_c0_seq1	52.9791	1.89854	0.00203289	NA	NA	NA
Unknown	comp4383_c0_seq1	75.9002	1.91813	0.0299412	NA	NA	NA
Unknown	comp1355_c0_seq1	128.077	1.91983	0.000305979	NA	NA	NA
Unknown	comp4212_c0_seq1	81.2167	1.92938	0.00359416	NA	NA	NA
Unknown	comp919_c0_seq1	228.814	1.94041	0.012748	NA	NA	NA
Unknown	comp7552_c0_seq1	42.5191	1.94199	0.00836753	NA	NA	NA
Unknown	comp3092_c0_seq1	64.1667	1.94348	0.00477139	NA	NA	NA
Unknown	comp4540_c0_seq1	113.401	1.94531	0.0205926	NA	NA	NA
Unknown	comp21030_c0_seq1	40.6431	1.94739	0.00181663	NA	NA	NA
Unknown	comp3423_c0_seq1	67.5175	1.95331	0.0313743	NA	NA	NA
Unknown	comp22904_c0_seq1	17.6225	1.9547	0.0124541	NA	NA	NA
Unknown	comp229_c0_seq1	33.3952	1.95616	0.00118838	NA	NA	NA
Unknown	comp22562_c0_seq1	17.8085	1.96062	0.0340243	NA	NA	NA
Unknown	comp15719_c0_seq1	49.3292	1.9633	0.00871454	NA	NA	NA
Unknown	comp1903_c0_seq1	245.898	1.96537	0.000226957	NA	NA	NA
Unknown	comp3693_c0_seq1	13.8123	1.96562	0.0188121	NA	NA	NA
Unknown	comp21747_c0_seq1	29.2098	1.9683	0.00964848	NA	NA	NA
Unknown	comp37647_c0_seq1	38.4206	1.96919	0.000268976	NA	NA	NA
Unknown	comp5365_c0_seq1	33.5776	1.96933	0.00688781	NA	NA	NA
Unknown	comp10598_c0_seq1	59.3443	1.96958	0.0336991	NA	NA	NA
Unknown	comp6268_c0_seq1	27.8543	1.97527	0.00436863	NA	NA	NA
Unknown	comp76305_c0_seq1	9.44667	1.98112	0.0423274	NA	NA	NA
Unknown	comp5277_c0_seq1	74.2141	1.9814	0.0166597	NA	NA	NA
Unknown	comp29561_c0_seq1	17.2053	1.98161	0.0218614	NA	NA	NA
Unknown	comp33987_c0_seq1	13.242	1.9817	0.0287265	NA	NA	NA
Unknown	comp9065_c0_seq1	80.731	1.98862	0.00106367	NA	NA	NA
Unknown	comp11556_c0_seq1	78.9297	1.99169	0.027494	NA	NA	NA
Unknown	comp12757_c0_seq1	165.469	1.99179	0.00107908	NA	NA	NA
Unknown	comp2776_c0_seq1	257.066	1.99702	0.000278955	NA	NA	NA
Unknown	comp10985_c0_seq1	64.4664	1.99717	0.00191134	NA	NA	NA
Unknown	comp55173_c0_seq1	18.53	1.99805	0.0174071	NA	NA	NA
Unknown	comp6814_c0_seq1	38.3512	1.9999	0.00224963	NA	NA	NA
Unknown	comp3041_c0_seq1	72.4882	2.00384	0.00121062	NA	NA	NA
Unknown	comp27328_c0_seq1	17.9663	2.00805	0.0151621	NA	NA	NA
Unknown	comp796_c0_seq1	970.351	2.01006	0.000250596	NA	NA	NA
Unknown	comp8330_c0_seq1	108.079	2.01297	0.0115193	NA	NA	NA
Unknown	comp9804_c0_seq1	309.522	2.01341	0.0272298	NA	NA	NA
Unknown	comp10389_c0_seq1	63.7791	2.02017	0.00420386	NA	NA	NA
Unknown	comp8139_c0_seq1	87.0395	2.02219	0.000202509	NA	NA	NA
Unknown	comp35312_c0_seq1	22.6241	2.02249	0.00131142	NA	NA	NA
Unknown	comp28578_c0_seq1	9.84548	2.02525	0.0362005	NA	NA	NA
Unknown	comp17637_c0_seq1	95.9472	2.02634	0.000591899	NA	NA	NA
Unknown	comp3468_c0_seq1	137.017	2.02724	3.63e-05	NA	NA	NA
Unknown	comp17256_c0_seq1	21.8972	2.02777	0.0170677	NA	NA	NA
Unknown	comp16037_c0_seq1	54.534	2.0279	0.00142654	NA	NA	NA
Unknown	comp483_c0_seq1	317.213	2.02931	0.000119515	NA	NA	NA
Unknown	comp32422_c0_seq1	22.0045	2.02994	0.00738404	NA	NA	NA
Unknown	comp33875_c0_seq1	20.8133	2.03508	0.0143128	NA	NA	NA
Unknown	comp11642_c0_seq1	36.8659	2.04064	0.00560283	NA	NA	NA
Unknown	comp15392_c0_seq1	33.7625	2.04198	0.00673425	NA	NA	NA
Unknown	comp52091_c0_seq1	14.7396	2.04481	0.0363699	NA	NA	NA
Unknown	comp7777_c0_seq1	37.9596	2.04933	0.000998096	NA	NA	NA
Unknown	comp12216_c0_seq1	71.6498	2.05111	0.00250411	NA	NA	NA
Unknown	comp22268_c0_seq1	10.8232	2.0541	0.0171176	NA	NA	NA
Unknown	comp10103_c0_seq1	97.3695	2.05626	0.0231005	NA	NA	NA
Unknown	comp17429_c0_seq1	59.4204	2.05887	0.0202661	NA	NA	NA
Unknown	comp2682_c0_seq1	288.572	2.05975	0.00301625	NA	NA	NA
Unknown	comp14145_c0_seq1	15.8748	2.06276	0.022977	NA	NA	NA
Unknown	comp5779_c0_seq1	28.615	2.06328	0.00956919	NA	NA	NA
Unknown	comp705_c0_seq1	344.904	2.06386	0.00297035	NA	NA	NA
Unknown	comp12164_c0_seq1	15.4625	2.06535	0.00602703	NA	NA	NA
Unknown	comp7367_c0_seq1	18.28	2.07106	0.0242312	NA	NA	NA
Unknown	comp5486_c0_seq1	55.0551	2.077	0.0118539	NA	NA	NA
Unknown	comp3994_c0_seq1	85.8262	2.08092	0.00122456	NA	NA	NA
Unknown	comp30004_c0_seq1	11.8303	2.08286	0.0350098	NA	NA	NA
Unknown	comp8956_c0_seq1	172.911	2.08399	0.0371395	NA	NA	NA
Unknown	comp17873_c0_seq1	31.1241	2.08557	0.0021052	NA	NA	NA
Unknown	comp3266_c0_seq1	12.3211	2.08979	0.0478814	NA	NA	NA
Unknown	comp27457_c0_seq1	10.0613	2.09011	0.0199984	NA	NA	NA
Unknown	comp15415_c0_seq1	14.6993	2.09318	0.0229755	NA	NA	NA
Unknown	comp9545_c0_seq1	19.358	2.09628	0.0131477	NA	NA	NA
Unknown	comp29008_c0_seq1	49.2259	2.10061	0.000299206	NA	NA	NA
Unknown	comp22397_c0_seq1	19.0607	2.10086	0.0104465	NA	NA	NA
Unknown	comp1446_c0_seq1	643.967	2.10417	0.000205951	NA	NA	NA
Unknown	comp15_c0_seq1	1192.67	2.10507	9.47e-05	NA	NA	NA
Unknown	comp1064_c0_seq1	476.74	2.10687	0.000107466	NA	NA	NA
Unknown	comp10154_c0_seq1	46.6058	2.10698	0.0204432	NA	NA	NA
Unknown	comp23598_c0_seq1	27.4719	2.112	0.00544014	NA	NA	NA
Unknown	comp19181_c0_seq1	27.1118	2.11263	0.00791983	NA	NA	NA
Unknown	comp34790_c0_seq1	8.55989	2.11363	0.0328535	NA	NA	NA
Unknown	comp29380_c0_seq1	16.3868	2.11691	0.0309879	NA	NA	NA
Unknown	comp20049_c0_seq1	27.1906	2.11756	0.00456016	NA	NA	NA
Unknown	comp12044_c0_seq1	30.6103	2.12639	0.000527972	NA	NA	NA
Unknown	comp8698_c0_seq1	99.9704	2.13121	0.000243499	NA	NA	NA
Unknown	comp28507_c0_seq1	11.5142	2.13127	0.0169642	NA	NA	NA
Unknown	comp41097_c0_seq1	20.9641	2.13199	0.00860243	NA	NA	NA
Unknown	comp3232_c0_seq1	15.9482	2.13678	0.0122873	NA	NA	NA
Unknown	comp27282_c0_seq1	23.4811	2.13785	0.00694488	NA	NA	NA
Unknown	comp38743_c0_seq1	11.339	2.14038	0.0227544	NA	NA	NA
Unknown	comp7501_c0_seq1	44.5029	2.14576	0.00121956	NA	NA	NA
Unknown	comp18127_c0_seq1	96.4053	2.14587	0.00990701	NA	NA	NA
Unknown	comp3005_c0_seq1	37.9466	2.14682	0.00148705	NA	NA	NA
Unknown	comp12662_c0_seq1	95.3546	2.147	0.00480902	NA	NA	NA
Unknown	comp29765_c0_seq1	54.3937	2.14891	0.00110907	NA	NA	NA
Unknown	comp24936_c0_seq1	24.0522	2.15909	0.0426876	NA	NA	NA
Unknown	comp41177_c0_seq1	19.0706	2.16105	0.019423	NA	NA	NA
Unknown	comp4433_c0_seq1	164.46	2.1625	6.23e-05	NA	NA	NA
Unknown	comp23381_c0_seq1	54.6221	2.16555	0.0105626	NA	NA	NA
Unknown	comp25712_c0_seq1	21.8791	2.16966	0.0313743	NA	NA	NA
Unknown	comp19100_c0_seq1	116.095	2.17543	0.0168624	NA	NA	NA
Unknown	comp9381_c0_seq1	546.087	2.17767	2.91e-05	NA	NA	NA
Unknown	comp5343_c0_seq1	360.221	2.18145	1.17e-05	NA	NA	NA
Unknown	comp18052_c0_seq1	26.5369	2.18258	0.00163998	NA	NA	NA
Unknown	comp25809_c0_seq1	9.14031	2.18294	0.0356101	NA	NA	NA
Unknown	comp11593_c0_seq1	27.7784	2.18534	0.00275897	NA	NA	NA
Unknown	comp18550_c0_seq1	24.6905	2.18672	0.00816684	NA	NA	NA
Unknown	comp27240_c0_seq1	15.2518	2.18977	0.014165	NA	NA	NA
Unknown	comp28188_c0_seq1	32.7978	2.19043	0.0114971	NA	NA	NA
Unknown	comp32307_c0_seq1	120.545	2.19097	0.00923741	NA	NA	NA
Unknown	comp19476_c0_seq1	45.1721	2.19163	0.000941585	NA	NA	NA
Unknown	comp36844_c0_seq1	6.67048	2.19539	0.0388236	NA	NA	NA
Unknown	comp51243_c0_seq1	23.3171	2.20369	0.00666903	NA	NA	NA
Unknown	comp31874_c0_seq1	7.77999	2.20381	0.0371715	NA	NA	NA
Unknown	comp3410_c0_seq1	152.73	2.20464	0.0150583	NA	NA	NA
Unknown	comp43716_c0_seq1	12.5188	2.20535	0.0486468	NA	NA	NA
Unknown	comp22030_c0_seq1	17.1282	2.20593	0.00590563	NA	NA	NA
Unknown	comp25027_c0_seq1	28.979	2.21245	0.00180692	NA	NA	NA
Unknown	comp36859_c0_seq1	19.9615	2.21568	0.0148887	NA	NA	NA
Unknown	comp4596_c0_seq1	549.346	2.22704	2.98e-05	NA	NA	NA
Unknown	comp19027_c0_seq1	96.2415	2.23497	0.000101168	NA	NA	NA
Unknown	comp11038_c0_seq1	34.9014	2.23763	0.000782367	NA	NA	NA
Unknown	comp795_c0_seq1	75.6688	2.23914	1.59e-05	NA	NA	NA
Unknown	comp31516_c0_seq1	13.0971	2.24011	0.0327187	NA	NA	NA
Unknown	comp29270_c0_seq1	12.4292	2.24364	0.0337276	NA	NA	NA
Unknown	comp16465_c0_seq1	9.13396	2.24904	0.00354811	NA	NA	NA
Unknown	comp41194_c0_seq1	18.3527	2.25096	0.00169629	NA	NA	NA
Unknown	comp9599_c0_seq1	18.8736	2.25104	0.00136225	NA	NA	NA
Unknown	comp6826_c0_seq1	91.8178	2.25185	0.000264321	NA	NA	NA
Unknown	comp1906_c0_seq1	121.636	2.25433	0.000400669	NA	NA	NA
Unknown	comp6011_c0_seq1	73.8137	2.25924	0.0223137	NA	NA	NA
Unknown	comp12531_c0_seq1	44.4373	2.25927	0.000132248	NA	NA	NA
Unknown	comp19058_c0_seq1	14.5482	2.26016	0.0261076	NA	NA	NA
Unknown	comp29818_c0_seq1	10.6876	2.2602	0.0225205	NA	NA	NA
Unknown	comp4931_c0_seq1	121.466	2.26029	3.45e-05	NA	NA	NA
Unknown	comp31051_c0_seq1	17.4266	2.26105	0.00837926	NA	NA	NA
Unknown	comp27364_c0_seq1	10.439	2.2621	0.0134549	NA	NA	NA
Unknown	comp11935_c0_seq1	98.9786	2.26899	0.00100734	NA	NA	NA
Unknown	comp25798_c0_seq1	5.04639	2.26919	0.0293158	NA	NA	NA
Unknown	comp11764_c0_seq1	32.1178	2.2744	0.00153551	NA	NA	NA
Unknown	comp214_c0_seq1	316.156	2.27507	0.000287032	NA	NA	NA
Unknown	comp1612_c0_seq1	173.25	2.27549	1.82e-05	NA	NA	NA
Unknown	comp25901_c0_seq1	16.5278	2.27843	0.00589506	NA	NA	NA
Unknown	comp17473_c0_seq1	9.97131	2.27852	0.0167001	NA	NA	NA
Unknown	comp2300_c1_seq1	104.563	2.27927	4.01e-05	NA	NA	NA
Unknown	comp22080_c0_seq1	32.1384	2.27956	0.00906151	NA	NA	NA
Unknown	comp677_c0_seq1	1082.38	2.27972	0.00611938	NA	NA	NA
Unknown	comp2342_c0_seq1	147.832	2.28	9.65e-06	NA	NA	NA
Unknown	comp8659_c0_seq1	225.135	2.28018	0.000127388	NA	NA	NA
Unknown	comp52976_c0_seq1	15.571	2.28692	0.00592263	NA	NA	NA
Unknown	comp7148_c0_seq1	167.601	2.28912	1.4e-05	NA	NA	NA
Unknown	comp29655_c0_seq1	18.7914	2.29034	0.00576622	NA	NA	NA
Unknown	comp43037_c0_seq1	12.8035	2.29322	0.00131615	NA	NA	NA
Unknown	comp55329_c0_seq1	10.8807	2.29593	0.0355616	NA	NA	NA
Unknown	comp13832_c0_seq1	22.0187	2.29631	0.00131142	NA	NA	NA
Unknown	comp1518_c0_seq1	548.057	2.29707	0.000106669	NA	NA	NA
Unknown	comp6422_c0_seq1	124.938	2.29741	0.0370476	NA	NA	NA
Unknown	comp9477_c0_seq1	1297.96	2.30105	4.83e-06	NA	NA	NA
Unknown	comp58709_c0_seq1	12.9466	2.30243	0.017309	NA	NA	NA
Unknown	comp63408_c0_seq1	5.15175	2.30421	0.0467779	NA	NA	NA
Unknown	comp12799_c0_seq1	44.9906	2.30886	0.000360917	NA	NA	NA
Unknown	comp18443_c0_seq1	55.0246	2.31391	7.48e-05	NA	NA	NA
Unknown	comp76315_c0_seq1	10.5149	2.32139	0.0170677	NA	NA	NA
Unknown	comp22548_c0_seq1	7.06687	2.32194	0.0382122	NA	NA	NA
Unknown	comp2095_c0_seq1	644.053	2.32228	1.03e-05	NA	NA	NA
Unknown	comp37997_c0_seq1	7.85578	2.32305	0.0494054	NA	NA	NA
Unknown	comp53216_c0_seq1	7.71514	2.32821	0.0330894	NA	NA	NA
Unknown	comp36806_c0_seq1	10.6862	2.33761	0.0385658	NA	NA	NA
Unknown	comp24773_c0_seq1	32.3304	2.34209	0.00257818	NA	NA	NA
Unknown	comp15006_c0_seq1	53.7899	2.34306	0.00420927	NA	NA	NA
Unknown	comp10841_c0_seq1	127.892	2.35264	0.00045614	NA	NA	NA
Unknown	comp14333_c0_seq1	27.8319	2.35285	0.000567349	NA	NA	NA
Unknown	comp55216_c0_seq1	7.88606	2.35318	0.0373266	NA	NA	NA
Unknown	comp28630_c0_seq1	19.0797	2.35326	0.0021429	NA	NA	NA
Unknown	comp10256_c0_seq1	31.3306	2.35343	0.000125397	NA	NA	NA
Unknown	comp40841_c0_seq1	7.10588	2.37004	0.0332935	NA	NA	NA
Unknown	comp32660_c0_seq1	34.5875	2.37077	0.0289008	NA	NA	NA
Unknown	comp22942_c0_seq1	29.3432	2.37683	8.6e-05	NA	NA	NA
Unknown	comp62190_c0_seq1	12.3548	2.38653	0.0243066	NA	NA	NA
Unknown	comp33210_c0_seq1	8.91939	2.38856	0.0379532	NA	NA	NA
Unknown	comp6389_c0_seq1	255.843	2.38999	0.00968561	NA	NA	NA
Unknown	comp5900_c0_seq1	179.017	2.39318	3.78e-06	NA	NA	NA
Unknown	comp5279_c0_seq1	371.54	2.40116	0.0205254	NA	NA	NA
Unknown	comp25196_c0_seq1	14.7114	2.4036	0.0185784	NA	NA	NA
Unknown	comp7802_c0_seq1	126.177	2.41271	1.54e-06	NA	NA	NA
Unknown	comp20634_c0_seq1	48.1792	2.41309	0.000192961	NA	NA	NA
Unknown	comp25257_c0_seq1	21.0416	2.4168	0.00196622	NA	NA	NA
Unknown	comp25621_c0_seq1	15.1788	2.41721	0.00417972	NA	NA	NA
Unknown	comp62251_c0_seq1	9.53105	2.41921	0.027679	NA	NA	NA
Unknown	comp16292_c0_seq1	43.0845	2.42026	0.00107908	NA	NA	NA
Unknown	comp5362_c0_seq1	150.751	2.42291	1.05e-05	NA	NA	NA
Unknown	comp27428_c0_seq1	19.9235	2.42412	0.00281627	NA	NA	NA
Unknown	comp19088_c0_seq1	8.82755	2.42448	0.0228575	NA	NA	NA
Unknown	comp52856_c0_seq1	13.6778	2.42483	0.00792923	NA	NA	NA
Unknown	comp31423_c0_seq1	23.3619	2.43168	0.000977474	NA	NA	NA
Unknown	comp2269_c0_seq1	192.906	2.43215	0.000670555	NA	NA	NA
Unknown	comp13084_c0_seq1	18.6062	2.43941	0.00273032	NA	NA	NA
Unknown	comp29338_c0_seq1	24.8778	2.44114	0.014165	NA	NA	NA
Unknown	comp14903_c0_seq1	24.9382	2.44376	0.000196219	NA	NA	NA
Unknown	comp16604_c0_seq1	12.4577	2.44698	0.00451272	NA	NA	NA
Unknown	comp46627_c0_seq1	10.9065	2.44699	0.00500376	NA	NA	NA
Unknown	comp4085_c0_seq1	80.0834	2.44943	0.0467779	NA	NA	NA
Unknown	comp50640_c0_seq1	7.61233	2.45001	0.0471736	NA	NA	NA
Unknown	comp6554_c0_seq1	214.262	2.45476	0.000655705	NA	NA	NA
Unknown	comp29699_c0_seq1	31.6882	2.45532	0.000373426	NA	NA	NA
Unknown	comp18540_c0_seq1	17.9431	2.45551	0.0434117	NA	NA	NA
Unknown	comp6906_c0_seq1	114.831	2.4558	0.00506389	NA	NA	NA
Unknown	comp42011_c0_seq1	8.79212	2.45694	0.0174071	NA	NA	NA
Unknown	comp23877_c0_seq1	14.7707	2.45824	0.00395109	NA	NA	NA
Unknown	comp28090_c0_seq1	8.1433	2.46427	0.0227544	NA	NA	NA
Unknown	comp18065_c0_seq1	25.418	2.46603	0.0230211	NA	NA	NA
Unknown	comp26119_c0_seq1	33.3532	2.46642	0.0136972	NA	NA	NA
Unknown	comp30278_c0_seq1	14.069	2.47088	0.00311703	NA	NA	NA
Unknown	comp47192_c0_seq1	21.2112	2.47334	0.00111038	NA	NA	NA
Unknown	comp30755_c0_seq1	19.0699	2.47468	0.00102125	NA	NA	NA
Unknown	comp6269_c0_seq1	410.477	2.47779	9.36e-07	NA	NA	NA
Unknown	comp5424_c0_seq1	54.9852	2.47852	4.17e-05	NA	NA	NA
Unknown	comp22880_c0_seq1	10.0599	2.48133	0.0159914	NA	NA	NA
Unknown	comp16084_c0_seq1	90.2568	2.48138	2.91e-06	NA	NA	NA
Unknown	comp25200_c0_seq1	10.8138	2.48408	0.0439646	NA	NA	NA
Unknown	comp19843_c0_seq1	68.0875	2.48503	0.000361624	NA	NA	NA
Unknown	comp33028_c0_seq1	12.2942	2.48681	0.00395109	NA	NA	NA
Unknown	comp48595_c0_seq1	17.6336	2.48689	0.00355957	NA	NA	NA
Unknown	comp1036_c0_seq1	151.596	2.48906	1.37e-08	NA	NA	NA
Unknown	comp57988_c0_seq1	6.97737	2.49016	0.0224177	NA	NA	NA
Unknown	comp8093_c0_seq1	123.732	2.49582	5e-05	NA	NA	NA
Unknown	comp8672_c0_seq1	58.5518	2.5046	5.35e-06	NA	NA	NA
Unknown	comp8798_c0_seq1	42.0528	2.50696	2.54e-05	NA	NA	NA
Unknown	comp4774_c0_seq1	78.0805	2.51018	0.00152544	NA	NA	NA
Unknown	comp23384_c0_seq1	21.3743	2.51908	0.0171513	NA	NA	NA
Unknown	comp46144_c0_seq1	10.8784	2.51939	0.0191659	NA	NA	NA
Unknown	comp6954_c0_seq1	368.014	2.52008	0.00183225	NA	NA	NA
Unknown	comp12659_c0_seq1	24.6722	2.5256	0.0205242	NA	NA	NA
Unknown	comp18290_c0_seq1	57.039	2.52726	1.09e-05	NA	NA	NA
Unknown	comp22321_c0_seq1	33.5069	2.53087	0.00653572	NA	NA	NA
Unknown	comp7405_c0_seq1	220.78	2.53962	0.000440876	NA	NA	NA
Unknown	comp19285_c0_seq1	10.7885	2.54263	0.0159914	NA	NA	NA
Unknown	comp7693_c0_seq1	269.484	2.54296	0.000251732	NA	NA	NA
Unknown	comp21296_c0_seq1	8.40137	2.54422	0.0340833	NA	NA	NA
Unknown	comp14487_c0_seq1	13.237	2.55124	0.0124787	NA	NA	NA
Unknown	comp43523_c0_seq1	10.1541	2.56286	0.00675446	NA	NA	NA
Unknown	comp24655_c0_seq1	7.63231	2.56369	0.00234055	NA	NA	NA
Unknown	comp5204_c0_seq1	105.255	2.57215	2.95e-05	NA	NA	NA
Unknown	comp2051_c0_seq1	136.716	2.574	0.000533715	NA	NA	NA
Unknown	comp2840_c0_seq1	103.663	2.57434	0.0204658	NA	NA	NA
Unknown	comp5006_c0_seq1	158.087	2.57477	3.14e-07	NA	NA	NA
Unknown	comp33539_c0_seq1	17.7062	2.57666	0.00191652	NA	NA	NA
Unknown	comp47706_c0_seq1	20.0649	2.5824	0.000852335	NA	NA	NA
Unknown	comp8126_c0_seq1	40.6247	2.58383	0.00166794	NA	NA	NA
Unknown	comp30952_c0_seq1	4.54509	2.58654	0.0297427	NA	NA	NA
Unknown	comp29698_c0_seq1	60.6148	2.59198	0.00345538	NA	NA	NA
Unknown	comp2802_c0_seq1	586.548	2.59257	0.0471736	NA	NA	NA
Unknown	comp12706_c0_seq1	63.1206	2.59445	0.00577951	NA	NA	NA
Unknown	comp31041_c0_seq1	10.7693	2.59822	0.0165658	NA	NA	NA
Unknown	comp7993_c0_seq1	33.6948	2.59968	3.18e-06	NA	NA	NA
Unknown	comp54687_c0_seq1	8.57712	2.60465	0.0222644	NA	NA	NA
Unknown	comp578_c0_seq1	123.967	2.60486	1.39e-06	NA	NA	NA
Unknown	comp33934_c0_seq1	11.9818	2.60488	0.00677487	NA	NA	NA
Unknown	comp4981_c0_seq1	47.975	2.60911	4.23e-06	NA	NA	NA
Unknown	comp47518_c0_seq1	22.4903	2.60963	9.82e-05	NA	NA	NA
Unknown	comp34460_c0_seq1	26.5984	2.6106	0.000107919	NA	NA	NA
Unknown	comp29498_c0_seq1	17.3993	2.61219	0.00753704	NA	NA	NA
Unknown	comp21711_c0_seq1	37.9058	2.61918	0.0268415	NA	NA	NA
Unknown	comp9129_c0_seq1	33.4601	2.62397	3.64e-05	NA	NA	NA
Unknown	comp37346_c0_seq1	40.4373	2.63075	1.71e-05	NA	NA	NA
Unknown	comp41340_c0_seq1	71.6039	2.63348	0.0103135	NA	NA	NA
Unknown	comp60671_c0_seq1	16.1908	2.64062	0.00229357	NA	NA	NA
Unknown	comp9750_c0_seq1	84.1628	2.64611	3.4e-07	NA	NA	NA
Unknown	comp3702_c0_seq1	116.699	2.65046	0.0460634	NA	NA	NA
Unknown	comp12443_c0_seq1	27.7203	2.65404	1.01e-05	NA	NA	NA
Unknown	comp51273_c0_seq1	14.7232	2.65882	0.0015306	NA	NA	NA
Unknown	comp33629_c0_seq1	7.74734	2.65905	0.0168365	NA	NA	NA
Unknown	comp9851_c0_seq1	20.5832	2.66525	0.0026866	NA	NA	NA
Unknown	comp12900_c0_seq1	68.1383	2.66537	0.0243819	NA	NA	NA
Unknown	comp53065_c0_seq1	7.82042	2.66813	0.0113592	NA	NA	NA
Unknown	comp1719_c0_seq1	465.741	2.67092	9.76e-08	NA	NA	NA
Unknown	comp45111_c0_seq1	14.0228	2.67783	0.0053848	NA	NA	NA
Unknown	comp51587_c0_seq1	64.1296	2.67791	0.0136765	NA	NA	NA
Unknown	comp46333_c0_seq1	14.5275	2.67905	0.00218857	NA	NA	NA
Unknown	comp7581_c0_seq1	69.9935	2.68218	7.59e-06	NA	NA	NA
Unknown	comp72189_c0_seq1	7.10413	2.68458	0.0137322	NA	NA	NA
Unknown	comp39713_c0_seq1	6.6061	2.68471	0.0148423	NA	NA	NA
Unknown	comp65628_c0_seq1	5.49577	2.69008	0.0454961	NA	NA	NA
Unknown	comp21227_c0_seq1	19.234	2.69076	0.00480101	NA	NA	NA
Unknown	comp36126_c0_seq1	11.5294	2.69452	0.00234902	NA	NA	NA
Unknown	comp9844_c0_seq1	177.192	2.69539	0.00273032	NA	NA	NA
Unknown	comp26362_c0_seq1	11.896	2.69753	0.00184456	NA	NA	NA
Unknown	comp9016_c0_seq1	226.173	2.69947	6.83e-08	NA	NA	NA
Unknown	comp47050_c0_seq1	16.4149	2.70886	0.00287805	NA	NA	NA
Unknown	comp14840_c0_seq1	221.698	2.71419	0.0185872	NA	NA	NA
Unknown	comp38957_c0_seq1	34.0729	2.71584	4.21e-05	NA	NA	NA
Unknown	comp16836_c0_seq1	15.7216	2.72885	0.00135201	NA	NA	NA
Unknown	comp49842_c0_seq1	22.4071	2.73383	0.000845499	NA	NA	NA
Unknown	comp53731_c0_seq1	6.01685	2.73655	0.0277534	NA	NA	NA
Unknown	comp26198_c0_seq1	30.8812	2.73776	0.0156509	NA	NA	NA
Unknown	comp27981_c0_seq1	16.9411	2.73814	0.000563334	NA	NA	NA
Unknown	comp15556_c0_seq1	38.0224	2.74329	1.25e-05	NA	NA	NA
Unknown	comp71610_c0_seq1	5.51161	2.7461	0.0386327	NA	NA	NA
Unknown	comp30401_c0_seq1	10.6726	2.75479	0.00259367	NA	NA	NA
Unknown	comp64338_c0_seq1	7.21704	2.75626	0.0209729	NA	NA	NA
Unknown	comp14305_c0_seq1	29.9142	2.7616	0.000105629	NA	NA	NA
Unknown	comp33268_c0_seq1	16.0598	2.76969	0.0289797	NA	NA	NA
Unknown	comp53909_c0_seq1	5.75217	2.77025	0.0376099	NA	NA	NA
Unknown	comp17058_c0_seq1	56.7504	2.77327	2.05e-07	NA	NA	NA
Unknown	comp16326_c0_seq1	127.529	2.77342	0.0074122	NA	NA	NA
Unknown	comp40952_c0_seq1	19.4141	2.77659	0.000440038	NA	NA	NA
Unknown	comp13951_c0_seq1	152.242	2.77956	0.0309045	NA	NA	NA
Unknown	comp8680_c0_seq1	83.5283	2.78138	4.71e-08	NA	NA	NA
Unknown	comp21945_c0_seq1	22.9816	2.78302	6.56e-05	NA	NA	NA
Unknown	comp25969_c0_seq1	32.2738	2.78531	3.27e-05	NA	NA	NA
Unknown	comp16801_c0_seq1	10.0695	2.78631	0.00274747	NA	NA	NA
Unknown	comp26851_c0_seq1	14.3556	2.79372	0.000228831	NA	NA	NA
Unknown	comp34452_c0_seq1	15.0983	2.79472	0.000526934	NA	NA	NA
Unknown	comp42020_c0_seq1	17.5077	2.79687	0.000107278	NA	NA	NA
Unknown	comp68263_c0_seq1	11.2735	2.79799	0.00230316	NA	NA	NA
Unknown	comp6970_c0_seq1	179.627	2.80344	1.58e-08	NA	NA	NA
Unknown	comp12185_c0_seq1	37.9221	2.80634	3e-06	NA	NA	NA
Unknown	comp45310_c0_seq1	10.195	2.81655	0.0291494	NA	NA	NA
Unknown	comp24980_c0_seq1	10.1696	2.81983	0.0129198	NA	NA	NA
Unknown	comp54856_c0_seq1	32.8811	2.82065	0.00919826	NA	NA	NA
Unknown	comp4536_c0_seq1	29.6452	2.82837	6.17e-06	NA	NA	NA
Unknown	comp29062_c0_seq1	13.361	2.82851	0.000275703	NA	NA	NA
Unknown	comp47190_c0_seq1	6.51934	2.82891	0.0358444	NA	NA	NA
Unknown	comp5549_c0_seq1	197.07	2.83368	0.000994674	NA	NA	NA
Unknown	comp37539_c0_seq1	19.867	2.83681	0.00729072	NA	NA	NA
Unknown	comp23028_c0_seq1	6.447	2.84336	0.0255134	NA	NA	NA
Unknown	comp35235_c0_seq1	15.3145	2.85742	0.0166597	NA	NA	NA
Unknown	comp39802_c0_seq1	39.9893	2.86128	0.0468726	NA	NA	NA
Unknown	comp41672_c0_seq1	8.22857	2.86369	0.0136487	NA	NA	NA
Unknown	comp26936_c0_seq1	20.9617	2.8646	0.00183225	NA	NA	NA
Unknown	comp43343_c0_seq1	37.7131	2.87065	0.000593584	NA	NA	NA
Unknown	comp9720_c0_seq1	1025.56	2.87458	0.0206444	NA	NA	NA
Unknown	comp38931_c0_seq1	14.3945	2.87878	0.000305802	NA	NA	NA
Unknown	comp1812_c0_seq1	31.1254	2.88073	0.00381771	NA	NA	NA
Unknown	comp29606_c0_seq1	9.81983	2.88186	0.00417972	NA	NA	NA
Unknown	comp2271_c0_seq1	405.562	2.88496	0.00345517	NA	NA	NA
Unknown	comp13534_c0_seq1	54.777	2.88511	4.66e-08	NA	NA	NA
Unknown	comp50429_c0_seq1	6.82584	2.8868	0.00376249	NA	NA	NA
Unknown	comp5508_c0_seq1	36.3486	2.88886	1.71e-05	NA	NA	NA
Unknown	comp28197_c0_seq1	24.1104	2.89548	6.7e-06	NA	NA	NA
Unknown	comp28617_c0_seq1	40.842	2.89584	0.00690408	NA	NA	NA
Unknown	comp46451_c0_seq1	7.07094	2.90122	0.048928	NA	NA	NA
Unknown	comp198_c0_seq1	1820.12	2.90242	0.000150279	NA	NA	NA
Unknown	comp2223_c0_seq1	169.484	2.90457	0.00269669	NA	NA	NA
Unknown	comp63347_c0_seq1	5.9363	2.91572	0.0288733	NA	NA	NA
Unknown	comp35661_c0_seq1	18.1871	2.92103	0.000228793	NA	NA	NA
Unknown	comp32230_c0_seq1	9.732	2.92832	0.0172198	NA	NA	NA
Unknown	comp33532_c0_seq1	16.2842	2.93513	2.18e-05	NA	NA	NA
Unknown	comp35939_c0_seq1	11.7291	2.94252	0.00873442	NA	NA	NA
Unknown	comp69155_c0_seq1	5.05294	2.94412	0.0188321	NA	NA	NA
Unknown	comp35589_c0_seq1	15.023	2.9442	0.00525373	NA	NA	NA
Unknown	comp43230_c0_seq1	7.21546	2.94754	0.0125571	NA	NA	NA
Unknown	comp36788_c0_seq1	13.0955	2.95031	0.0336991	NA	NA	NA
Unknown	comp61951_c0_seq1	15.7529	2.95126	0.0328078	NA	NA	NA
Unknown	comp35544_c0_seq1	6.25173	2.95132	0.0105451	NA	NA	NA
Unknown	comp5938_c0_seq1	59.3123	2.95623	1.63e-09	NA	NA	NA
Unknown	comp45272_c0_seq1	6.11808	2.95892	0.0103683	NA	NA	NA
Unknown	comp52644_c0_seq1	7.85041	2.96195	0.0128023	NA	NA	NA
Unknown	comp12615_c0_seq1	37.0738	2.9644	5.25e-06	NA	NA	NA
Unknown	comp32629_c0_seq1	12.6191	2.96485	0.00596696	NA	NA	NA
Unknown	comp922_c0_seq1	668.764	2.96846	2.95e-10	NA	NA	NA
Unknown	comp722_c0_seq1	101.758	2.97036	2.07e-09	NA	NA	NA
Unknown	comp4244_c0_seq1	347.524	2.97144	3.63e-05	NA	NA	NA
Unknown	comp14031_c0_seq1	265.748	2.98239	1.28e-10	NA	NA	NA
Unknown	comp77829_c0_seq1	6.28595	2.98819	0.030314	NA	NA	NA
Unknown	comp45376_c0_seq1	20.8645	2.99021	0.000847564	NA	NA	NA
Unknown	comp46380_c0_seq1	12.778	2.99106	0.0153226	NA	NA	NA
Unknown	comp19203_c0_seq1	84.395	3.00113	1.02e-08	NA	NA	NA
Unknown	comp50662_c0_seq1	20.1848	3.00302	9.17e-05	NA	NA	NA
Unknown	comp6065_c0_seq1	433.852	3.00914	0.00817394	NA	NA	NA
Unknown	comp408_c0_seq1	1454	3.01438	1.16e-06	NA	NA	NA
Unknown	comp42315_c0_seq1	40.5141	3.01613	1.16e-06	NA	NA	NA
Unknown	comp3198_c0_seq1	125.621	3.01764	3.63e-06	NA	NA	NA
Unknown	comp79933_c0_seq1	11.6446	3.01874	0.0269004	NA	NA	NA
Unknown	comp30972_c0_seq1	13.0574	3.02378	0.0322065	NA	NA	NA
Unknown	comp9948_c0_seq1	122.366	3.02544	3.46e-05	NA	NA	NA
Unknown	comp49894_c0_seq1	6.53079	3.02911	0.00783343	NA	NA	NA
Unknown	comp55587_c0_seq1	8.44361	3.03335	0.00464862	NA	NA	NA
Unknown	comp8667_c0_seq1	140.11	3.05041	2.68e-07	NA	NA	NA
Unknown	comp63820_c0_seq1	12.4883	3.05123	0.000237556	NA	NA	NA
Unknown	comp71945_c0_seq1	7.88177	3.05845	0.00931664	NA	NA	NA
Unknown	comp51229_c0_seq1	10.0603	3.05984	0.00125086	NA	NA	NA
Unknown	comp4180_c0_seq1	101.953	3.06301	3.05e-10	NA	NA	NA
Unknown	comp7710_c0_seq1	153.697	3.06538	1.32e-05	NA	NA	NA
Unknown	comp31823_c0_seq1	15.4204	3.06753	0.00011037	NA	NA	NA
Unknown	comp49455_c0_seq1	42.742	3.07501	0.00171997	NA	NA	NA
Unknown	comp8636_c0_seq1	39.1619	3.07841	7.21e-07	NA	NA	NA
Unknown	comp32347_c0_seq1	11.1035	3.08235	0.000758028	NA	NA	NA
Unknown	comp76849_c0_seq1	13.5433	3.08789	0.0269479	NA	NA	NA
Unknown	comp10471_c0_seq1	49.5	3.08806	2.04e-06	NA	NA	NA
Unknown	comp34245_c0_seq1	12.6673	3.09273	0.000250596	NA	NA	NA
Unknown	comp62965_c0_seq1	6.2718	3.09534	0.0140372	NA	NA	NA
Unknown	comp64712_c0_seq1	14.4861	3.09691	0.000103182	NA	NA	NA
Unknown	comp16765_c0_seq1	38.0775	3.09874	0.0058084	NA	NA	NA
Unknown	comp9311_c0_seq1	35.2854	3.10186	1.15e-05	NA	NA	NA
Unknown	comp41607_c0_seq1	67.8027	3.10382	0.020749	NA	NA	NA
Unknown	comp58197_c0_seq1	16.386	3.10576	0.0309036	NA	NA	NA
Unknown	comp1218_c0_seq1	45.6804	3.10694	3.45e-05	NA	NA	NA
Unknown	comp947_c0_seq1	33.7402	3.11478	0.0313743	NA	NA	NA
Unknown	comp12451_c0_seq1	53.5409	3.11686	8.52e-09	NA	NA	NA
Unknown	comp263_c0_seq1	4911.97	3.11898	0.00542005	NA	NA	NA
Unknown	comp23759_c0_seq1	5.68951	3.12129	0.0151881	NA	NA	NA
Unknown	comp3849_c0_seq1	25.0591	3.12558	3.45e-07	NA	NA	NA
Unknown	comp63148_c0_seq1	4.54169	3.12599	0.0235527	NA	NA	NA
Unknown	comp33275_c0_seq1	22.1031	3.126	0.00420927	NA	NA	NA
Unknown	comp41316_c0_seq1	7.84095	3.12772	0.00125618	NA	NA	NA
Unknown	comp11964_c0_seq1	56.4842	3.13292	0.00115329	NA	NA	NA
Unknown	comp38171_c0_seq1	7.29538	3.13679	0.00258823	NA	NA	NA
Unknown	comp24503_c0_seq1	5.81192	3.1467	0.00824214	NA	NA	NA
Unknown	comp24716_c0_seq1	9.61092	3.15209	0.000636353	NA	NA	NA
Unknown	comp8072_c0_seq1	61.485	3.15265	0.00020809	NA	NA	NA
Unknown	comp5309_c0_seq1	263.271	3.15479	3.16e-07	NA	NA	NA
Unknown	comp23995_c0_seq1	23.8713	3.17037	1.51e-05	NA	NA	NA
Unknown	comp86999_c0_seq1	5.14042	3.17176	0.0223137	NA	NA	NA
Unknown	comp87272_c0_seq1	6.96136	3.17858	0.00604138	NA	NA	NA
Unknown	comp14007_c0_seq1	25.1365	3.18997	0.0166597	NA	NA	NA
Unknown	comp8791_c0_seq1	697.01	3.20086	7.38e-06	NA	NA	NA
Unknown	comp24689_c0_seq1	18.8997	3.20197	1.03e-05	NA	NA	NA
Unknown	comp48640_c0_seq1	6.74861	3.20898	0.00723291	NA	NA	NA
Unknown	comp504_c0_seq1	2912.13	3.22088	0.00110783	NA	NA	NA
Unknown	comp33045_c0_seq1	4.22781	3.22644	0.0265823	NA	NA	NA
Unknown	comp88738_c0_seq1	7.69521	3.22707	0.00102125	NA	NA	NA
Unknown	comp83175_c0_seq1	5.66454	3.23652	0.00821725	NA	NA	NA
Unknown	comp12979_c0_seq1	63.8236	3.24224	8.83e-10	NA	NA	NA
Unknown	comp60270_c0_seq1	4.99684	3.24756	0.0187172	NA	NA	NA
Unknown	comp53515_c0_seq1	20.3369	3.25351	5.27e-06	NA	NA	NA
Unknown	comp78351_c0_seq1	4.70025	3.25352	0.0165576	NA	NA	NA
Unknown	comp18551_c0_seq1	30.8223	3.25538	2.7e-08	NA	NA	NA
Unknown	comp771_c0_seq1	2073.03	3.25906	2.38e-07	NA	NA	NA
Unknown	comp87378_c0_seq1	3.35424	3.26948	0.0380204	NA	NA	NA
Unknown	comp8385_c0_seq1	218.387	3.26959	1.09e-11	NA	NA	NA
Unknown	comp58941_c0_seq1	10.4135	3.28467	0.000238052	NA	NA	NA
Unknown	comp34238_c0_seq1	48.5429	3.28531	0.012619	NA	NA	NA
Unknown	comp50214_c0_seq1	18.0056	3.29013	6.97e-06	NA	NA	NA
Unknown	comp484_c0_seq1	279.434	3.29654	5.99e-13	NA	NA	NA
Unknown	comp11352_c0_seq1	223.043	3.30876	3.56e-12	NA	NA	NA
Unknown	comp51109_c0_seq1	4.49603	3.31815	0.0277772	NA	NA	NA
Unknown	comp14597_c0_seq1	179.144	3.31902	5.84e-06	NA	NA	NA
Unknown	comp32452_c0_seq1	4.93902	3.32007	0.00556069	NA	NA	NA
Unknown	comp39195_c0_seq1	57.7245	3.32278	0.00560283	NA	NA	NA
Unknown	comp48602_c0_seq1	18.8578	3.3318	5.28e-06	NA	NA	NA
Unknown	comp12467_c0_seq1	68.1433	3.3332	2.96e-11	NA	NA	NA
Unknown	comp49705_c0_seq1	4.33985	3.337	0.040066	NA	NA	NA
Unknown	comp33694_c0_seq1	38.8607	3.34017	0.0439272	NA	NA	NA
Unknown	comp56306_c0_seq1	8.80384	3.34765	0.0269831	NA	NA	NA
Unknown	comp69150_c0_seq1	11.6702	3.35053	0.000131823	NA	NA	NA
Unknown	comp22112_c0_seq1	131.173	3.35527	0.00198504	NA	NA	NA
Unknown	comp93871_c0_seq1	4.38656	3.35662	0.0371767	NA	NA	NA
Unknown	comp56906_c0_seq1	12.0567	3.35843	0.000250596	NA	NA	NA
Unknown	comp1183_c0_seq1	165.774	3.36562	0.00101294	NA	NA	NA
Unknown	comp15184_c0_seq1	70.5531	3.37121	2.13e-05	NA	NA	NA
Unknown	comp44238_c0_seq1	14.9636	3.37838	0.00494408	NA	NA	NA
Unknown	comp80435_c0_seq1	9.23956	3.41851	0.000488558	NA	NA	NA
Unknown	comp53127_c0_seq1	15.3339	3.42304	0.0327716	NA	NA	NA
Unknown	comp86199_c0_seq1	4.59418	3.43212	0.0425665	NA	NA	NA
Unknown	comp1237_c0_seq1	307.182	3.43382	2.22e-07	NA	NA	NA
Unknown	comp32378_c0_seq1	19.9889	3.43553	0.00554049	NA	NA	NA
Unknown	comp25942_c0_seq1	24.3978	3.43638	0.000550007	NA	NA	NA
Unknown	comp15652_c0_seq1	7.86132	3.43911	0.00763715	NA	NA	NA
Unknown	comp62777_c0_seq1	7.01416	3.4431	0.00297361	NA	NA	NA
Unknown	comp30428_c0_seq1	14.4928	3.44417	0.000192863	NA	NA	NA
Unknown	comp55887_c0_seq1	9.30116	3.44593	0.000229826	NA	NA	NA
Unknown	comp17716_c0_seq1	51.8389	3.45834	0.000847408	NA	NA	NA
Unknown	comp35248_c0_seq1	14.756	3.46815	0.000181746	NA	NA	NA
Unknown	comp23495_c0_seq1	18.8338	3.48541	0.000188264	NA	NA	NA
Unknown	comp4792_c0_seq1	26.3316	3.48585	0.000287149	NA	NA	NA
Unknown	comp29384_c0_seq1	54.4104	3.49581	4e-06	NA	NA	NA
Unknown	comp29461_c0_seq1	10.2493	3.50137	0.000730503	NA	NA	NA
Unknown	comp29300_c0_seq1	13.8103	3.50552	8.99e-07	NA	NA	NA
Unknown	comp26265_c0_seq1	19.8638	3.50715	1.42e-07	NA	NA	NA
Unknown	comp55952_c0_seq1	6.64034	3.5175	0.00307203	NA	NA	NA
Unknown	comp55368_c0_seq1	6.42094	3.52008	0.001978	NA	NA	NA
Unknown	comp89144_c0_seq1	4.36642	3.52115	0.0313743	NA	NA	NA
Unknown	comp36998_c0_seq1	5.1681	3.52602	0.000852154	NA	NA	NA
Unknown	comp7303_c0_seq1	400.112	3.53438	2.12e-14	NA	NA	NA
Unknown	comp310_c0_seq1	490.835	3.53966	2.14e-05	NA	NA	NA
Unknown	comp31389_c0_seq1	27.6119	3.5463	0.00769478	NA	NA	NA
Unknown	comp50971_c0_seq1	13.1725	3.54683	0.00113661	NA	NA	NA
Unknown	comp18727_c0_seq1	29.4686	3.55746	1.47e-08	NA	NA	NA
Unknown	comp8666_c0_seq1	193.273	3.56208	3.04e-07	NA	NA	NA
Unknown	comp26866_c0_seq1	16.2892	3.56677	5.65e-06	NA	NA	NA
Unknown	comp19310_c0_seq1	72.4686	3.56708	4.66e-08	NA	NA	NA
Unknown	comp21354_c0_seq1	7.79537	3.57195	0.000127651	NA	NA	NA
Unknown	comp46238_c0_seq1	16.6264	3.58394	0.000490448	NA	NA	NA
Unknown	comp76207_c0_seq1	7.22531	3.58844	0.00163224	NA	NA	NA
Unknown	comp46722_c0_seq1	8.85086	3.61405	0.000320047	NA	NA	NA
Unknown	comp23247_c0_seq1	12.2253	3.61955	8.55e-06	NA	NA	NA
Unknown	comp33280_c0_seq1	58.5618	3.62777	2.53e-07	NA	NA	NA
Unknown	comp48442_c0_seq1	9.20265	3.63876	0.000183587	NA	NA	NA
Unknown	comp829_c0_seq1	56.3615	3.64246	0.0129058	NA	NA	NA
Unknown	comp93963_c0_seq1	4.72909	3.64521	0.0132532	NA	NA	NA
Unknown	comp65416_c0_seq1	15.5991	3.66519	0.000280114	NA	NA	NA
Unknown	comp56791_c0_seq1	9.12378	3.67257	0.000222012	NA	NA	NA
Unknown	comp93418_c0_seq1	4.43538	3.68433	0.0136972	NA	NA	NA
Unknown	comp42877_c0_seq1	5.61236	3.69672	0.00811921	NA	NA	NA
Unknown	comp39399_c0_seq1	13.3608	3.704	1.49e-05	NA	NA	NA
Unknown	comp22405_c0_seq1	45.4743	3.71814	2.15e-06	NA	NA	NA
Unknown	comp47551_c0_seq1	3.62971	3.71848	0.0214611	NA	NA	NA
Unknown	comp22143_c0_seq1	12.6511	3.72006	1.46e-05	NA	NA	NA
Unknown	comp1107_c0_seq1	245.923	3.7227	0.00059357	NA	NA	NA
Unknown	comp45487_c0_seq1	19.7108	3.73097	0.00067731	NA	NA	NA
Unknown	comp80624_c0_seq1	4.19041	3.7311	0.0100624	NA	NA	NA
Unknown	comp19266_c0_seq1	61.8979	3.73125	2.88e-05	NA	NA	NA
Unknown	comp57186_c0_seq1	32.8938	3.73248	4.85e-10	NA	NA	NA
Unknown	comp1202_c0_seq1	821.897	3.74112	1.43e-05	NA	NA	NA
Unknown	comp80523_c0_seq1	3.83864	3.74214	0.040472	NA	NA	NA
Unknown	comp91303_c0_seq1	3.55681	3.76592	0.0324681	NA	NA	NA
Unknown	comp51053_c0_seq1	2.46384	3.77105	0.0170579	NA	NA	NA
Unknown	comp47379_c0_seq1	13.99	3.77143	3.56e-06	NA	NA	NA
Unknown	comp21801_c0_seq1	42.8893	3.77516	0.0414457	NA	NA	NA
Unknown	comp15689_c0_seq1	31.858	3.77634	7.31e-09	NA	NA	NA
Unknown	comp17247_c0_seq1	131.499	3.77641	0.00115782	NA	NA	NA
Unknown	comp9916_c0_seq1	628.888	3.7838	0.00937553	NA	NA	NA
Unknown	comp41042_c0_seq1	10.6932	3.79312	8.07e-06	NA	NA	NA
Unknown	comp970_c0_seq1	256.888	3.79482	2.32e-17	NA	NA	NA
Unknown	comp41848_c0_seq1	28.6392	3.79756	7.44e-10	NA	NA	NA
Unknown	comp4253_c0_seq1	155.989	3.81772	0.0382197	NA	NA	NA
Unknown	comp50264_c0_seq1	19.2805	3.824	0.00121062	NA	NA	NA
Unknown	comp627_c0_seq1	3801.98	3.82921	1.25e-09	NA	NA	NA
Unknown	comp35410_c0_seq1	12.7213	3.84094	1.41e-07	NA	NA	NA
Unknown	comp37778_c0_seq1	5.39603	3.84857	0.0128023	NA	NA	NA
Unknown	comp31685_c0_seq1	34.8525	3.84988	1.3e-11	NA	NA	NA
Unknown	comp53724_c0_seq1	21.4991	3.85551	0.0286729	NA	NA	NA
Unknown	comp51010_c0_seq1	5.30481	3.85561	0.00305493	NA	NA	NA
Unknown	comp43849_c0_seq1	15.3498	3.85613	0.00516114	NA	NA	NA
Unknown	comp28827_c0_seq1	17.966	3.85903	0.0178685	NA	NA	NA
Unknown	comp10169_c0_seq1	111.882	3.86298	4.49e-06	NA	NA	NA
Unknown	comp1343_c0_seq1	90.3846	3.86499	1.06e-05	NA	NA	NA
Unknown	comp28477_c0_seq1	30.1119	3.86523	0.00131142	NA	NA	NA
Unknown	comp10955_c0_seq1	748.923	3.86802	0.0293416	NA	NA	NA
Unknown	comp48955_c0_seq1	13.1716	3.86879	6.74e-07	NA	NA	NA
Unknown	comp48825_c0_seq1	19.734	3.87012	2.11e-05	NA	NA	NA
Unknown	comp82998_c0_seq1	4.07332	3.89563	0.0114971	NA	NA	NA
Unknown	comp52643_c0_seq1	11.8296	3.89882	0.000170154	NA	NA	NA
Unknown	comp58547_c0_seq1	5.51696	3.93141	0.00173497	NA	NA	NA
Unknown	comp5578_c0_seq1	410.515	3.94651	4.5e-05	NA	NA	NA
Unknown	comp4834_c0_seq1	72.3555	3.95964	2.13e-06	NA	NA	NA
Unknown	comp51620_c0_seq1	6.13349	3.96904	0.000188264	NA	NA	NA
Unknown	comp41989_c0_seq1	8.38169	3.97161	0.000107523	NA	NA	NA
Unknown	comp46718_c0_seq1	3.13215	3.97497	0.0459728	NA	NA	NA
Unknown	comp42581_c0_seq1	66.6685	3.97773	0.00163815	NA	NA	NA
Unknown	comp26235_c0_seq1	16.0563	3.98515	0.000168065	NA	NA	NA
Unknown	comp2043_c0_seq1	220.071	3.98715	1.37e-08	NA	NA	NA
Unknown	comp3706_c0_seq1	115.182	3.98803	8.32e-05	NA	NA	NA
Unknown	comp3590_c0_seq1	18.175	3.99187	1.82e-05	NA	NA	NA
Unknown	comp5744_c0_seq1	285.094	4.00253	2.6e-10	NA	NA	NA
Unknown	comp10236_c0_seq1	69.5571	4.00616	0.00222645	NA	NA	NA
Unknown	comp19811_c0_seq1	146.312	4.0147	0.00475371	NA	NA	NA
Unknown	comp4503_c0_seq1	260.82	4.02187	1.52e-19	NA	NA	NA
Unknown	comp25316_c0_seq1	26.4227	4.0253	0.0004927	NA	NA	NA
Unknown	comp20774_c0_seq1	13.1385	4.03328	0.0471736	NA	NA	NA
Unknown	comp73958_c0_seq1	2.97457	4.03516	0.0318804	NA	NA	NA
Unknown	comp70828_c0_seq1	11.7139	4.03853	0.000296012	NA	NA	NA
Unknown	comp74540_c0_seq1	9.26202	4.04501	4.76e-05	NA	NA	NA
Unknown	comp45137_c0_seq1	8.82982	4.07553	0.00231847	NA	NA	NA
Unknown	comp83952_c0_seq1	3.36472	4.07951	0.0190575	NA	NA	NA
Unknown	comp8838_c0_seq1	334.176	4.0834	1.24e-19	NA	NA	NA
Unknown	comp30142_c0_seq1	3.56492	4.09271	0.0192172	NA	NA	NA
Unknown	comp81039_c0_seq1	8.89679	4.113	0.0200625	NA	NA	NA
Unknown	comp18107_c0_seq1	70.5426	4.12478	1.34e-06	NA	NA	NA
Unknown	comp3990_c0_seq1	304.023	4.13606	0.018453	NA	NA	NA
Unknown	comp17630_c0_seq1	28.1697	4.15145	9.43e-05	NA	NA	NA
Unknown	comp35705_c0_seq1	26.2629	4.17486	0.000405767	NA	NA	NA
Unknown	comp43311_c0_seq1	8.07771	4.18048	0.0258105	NA	NA	NA
Unknown	comp27354_c0_seq1	60.3658	4.18089	0.0336991	NA	NA	NA
Unknown	comp12509_c0_seq1	90.9085	4.18572	3.84e-05	NA	NA	NA
Unknown	comp12010_c0_seq1	62.6869	4.20273	9.79e-16	NA	NA	NA
Unknown	comp23825_c0_seq1	62.4988	4.21017	0.000246193	NA	NA	NA
Unknown	comp3473_c0_seq1	95.5095	4.22064	4.99e-18	NA	NA	NA
Unknown	comp47857_c0_seq1	8.0377	4.22104	0.00963144	NA	NA	NA
Unknown	comp44895_c0_seq1	7.14102	4.23476	0.000144312	NA	NA	NA
Unknown	comp3144_c0_seq1	670.976	4.2427	4.38e-05	NA	NA	NA
Unknown	comp17341_c0_seq1	15.0184	4.25299	4.37e-09	NA	NA	NA
Unknown	comp59808_c0_seq1	11.9454	4.2668	6.51e-07	NA	NA	NA
Unknown	comp30686_c0_seq1	44.4045	4.27521	0.015396	NA	NA	NA
Unknown	comp16545_c0_seq1	38.0035	4.29467	7.96e-14	NA	NA	NA
Unknown	comp17277_c0_seq1	74.3811	4.30202	0.000282516	NA	NA	NA
Unknown	comp22376_c0_seq1	32.9967	4.30264	2.32e-13	NA	NA	NA
Unknown	comp30676_c0_seq1	14.3192	4.31008	0.000279256	NA	NA	NA
Unknown	comp4463_c0_seq1	223.957	4.31552	0.000287032	NA	NA	NA
Unknown	comp12619_c0_seq1	152.604	4.32287	2.48e-21	NA	NA	NA
Unknown	comp44976_c0_seq1	10.5418	4.33383	3.66e-06	NA	NA	NA
Unknown	comp33548_c0_seq1	11.3372	4.33717	4.99e-07	NA	NA	NA
Unknown	comp85103_c0_seq1	4.05009	4.34778	0.013593	NA	NA	NA
Unknown	comp29464_c0_seq1	24.9046	4.34946	7.19e-10	NA	NA	NA
Unknown	comp15656_c0_seq1	26.0369	4.35239	5.96e-12	NA	NA	NA
Unknown	comp7335_c0_seq1	95.7925	4.35635	3.29e-18	NA	NA	NA
Unknown	comp78601_c0_seq1	3.46763	4.36728	0.0209048	NA	NA	NA
Unknown	comp2222_c0_seq1	200.488	4.37083	6.91e-12	NA	NA	NA
Unknown	comp47702_c0_seq1	18.7095	4.37335	1.68e-09	NA	NA	NA
Unknown	comp31478_c0_seq1	6.71857	4.37597	5.2e-05	NA	NA	NA
Unknown	comp77471_c0_seq1	5.28397	4.377	0.000909614	NA	NA	NA
Unknown	comp75469_c0_seq1	4.07011	4.37804	0.0139904	NA	NA	NA
Unknown	comp29086_c0_seq1	12.7543	4.3974	4.89e-08	NA	NA	NA
Unknown	comp41137_c0_seq1	26.1576	4.41977	2.87e-11	NA	NA	NA
Unknown	comp90674_c0_seq1	2.97547	4.43154	0.0201262	NA	NA	NA
Unknown	comp43453_c0_seq1	10.2319	4.45137	0.01076	NA	NA	NA
Unknown	comp18569_c0_seq1	102.068	4.4537	1.85e-08	NA	NA	NA
Unknown	comp11575_c0_seq1	15.0053	4.46994	6.4e-06	NA	NA	NA
Unknown	comp8397_c0_seq1	109.557	4.47358	7.99e-13	NA	NA	NA
Unknown	comp40307_c0_seq1	9.93682	4.48508	6.16e-05	NA	NA	NA
Unknown	comp40370_c0_seq1	6.88779	4.48771	0.00014298	NA	NA	NA
Unknown	comp54762_c0_seq1	10.0625	4.49273	4.84e-06	NA	NA	NA
Unknown	comp8899_c0_seq1	222.725	4.49889	1.72e-12	NA	NA	NA
Unknown	comp8037_c0_seq1	253.952	4.50734	0.00218737	NA	NA	NA
Unknown	comp53673_c0_seq1	12.244	4.5114	5.68e-08	NA	NA	NA
Unknown	comp63561_c0_seq1	3.22731	4.53185	0.0218514	NA	NA	NA
Unknown	comp40198_c0_seq1	10.4908	4.53212	0.0152714	NA	NA	NA
Unknown	comp239_c0_seq1	2541.53	4.533	4.32e-08	NA	NA	NA
Unknown	comp29921_c0_seq1	76.477	4.55374	8.05e-09	NA	NA	NA
Unknown	comp39813_c0_seq1	44.3003	4.58612	1.41e-10	NA	NA	NA
Unknown	comp59860_c0_seq1	6.64392	4.60399	8.34e-05	NA	NA	NA
Unknown	comp74466_c0_seq1	3.85067	4.61904	0.00464862	NA	NA	NA
Unknown	comp68784_c0_seq1	7.37539	4.62737	0.0441158	NA	NA	NA
Unknown	comp46682_c0_seq1	9.30271	4.64461	1.93e-06	NA	NA	NA
Unknown	comp460_c0_seq1	233.129	4.6531	0.000846428	NA	NA	NA
Unknown	comp39478_c0_seq1	26.9255	4.6531	1.29e-12	NA	NA	NA
Unknown	comp13374_c0_seq1	80.6126	4.6704	3.71e-21	NA	NA	NA
Unknown	comp49105_c0_seq1	9.07315	4.67254	2.13e-05	NA	NA	NA
Unknown	comp21262_c0_seq1	54.0141	4.68075	3.68e-08	NA	NA	NA
Unknown	comp2451_c0_seq1	1956.61	4.68885	4.48e-06	NA	NA	NA
Unknown	comp46880_c0_seq1	20.5024	4.70731	0.00105716	NA	NA	NA
Unknown	comp45456_c0_seq1	30.0047	4.71658	6.4e-06	NA	NA	NA
Unknown	comp4127_c0_seq1	378.393	4.74998	7.45e-07	NA	NA	NA
Unknown	comp91422_c0_seq1	2.64781	4.75449	0.0385658	NA	NA	NA
Unknown	comp15186_c0_seq1	53.1888	4.75656	1.14e-06	NA	NA	NA
Unknown	comp10709_c0_seq1	566.614	4.76713	3.79e-10	NA	NA	NA
Unknown	comp5396_c0_seq1	233.032	4.78095	0.000398842	NA	NA	NA
Unknown	comp59989_c0_seq1	1.9024	4.81397	0.0480582	NA	NA	NA
Unknown	comp54529_c0_seq1	12.3967	4.81525	3.18e-08	NA	NA	NA
Unknown	comp30622_c0_seq1	15.2649	4.81929	1.54e-09	NA	NA	NA
Unknown	comp51158_c0_seq1	1.91054	4.82039	0.0476519	NA	NA	NA
Unknown	comp49206_c0_seq1	18.6735	4.82165	0.0222644	NA	NA	NA
Unknown	comp34527_c0_seq1	36.6296	4.82338	7.57e-10	NA	NA	NA
Unknown	comp74317_c0_seq1	7.92329	4.83984	3.67e-05	NA	NA	NA
Unknown	comp79629_c0_seq1	2.82944	4.84985	0.0297389	NA	NA	NA
Unknown	comp45755_c0_seq1	8.81049	4.85819	2.69e-06	NA	NA	NA
Unknown	comp22931_c0_seq1	7.35599	4.87026	0.0191966	NA	NA	NA
Unknown	comp27238_c0_seq1	38.9979	4.88019	2.73e-08	NA	NA	NA
Unknown	comp41468_c0_seq1	6.48224	4.89038	0.0442846	NA	NA	NA
Unknown	comp57467_c0_seq1	2.91766	4.89595	0.0252841	NA	NA	NA
Unknown	comp20582_c0_seq1	131.586	4.93511	2.32e-11	NA	NA	NA
Unknown	comp23389_c0_seq1	57.3727	4.94176	7.26e-09	NA	NA	NA
Unknown	comp24491_c0_seq1	21.1076	4.94622	4.8e-07	NA	NA	NA
Unknown	comp22874_c0_seq1	29.8425	4.94841	1.4e-15	NA	NA	NA
Unknown	comp28961_c0_seq1	69.3819	4.98332	6.68e-18	NA	NA	NA
Unknown	comp12114_c0_seq1	72.1173	5.0307	5.94e-06	NA	NA	NA
Unknown	comp59265_c0_seq1	2.68863	5.0671	0.0281075	NA	NA	NA
Unknown	comp28920_c0_seq1	32.0275	5.09696	3.5e-06	NA	NA	NA
Unknown	comp8868_c0_seq1	116.227	5.13144	1.87e-09	NA	NA	NA
Unknown	comp32604_c0_seq1	9.5534	5.13454	3.4e-07	NA	NA	NA
Unknown	comp67295_c0_seq1	6.06246	5.1409	5.35e-05	NA	NA	NA
Unknown	comp36653_c0_seq1	10.406	5.17093	9.77e-10	NA	NA	NA
Unknown	comp3403_c0_seq1	66.835	5.17187	1.65e-06	NA	NA	NA
Unknown	comp86902_c0_seq1	3.73048	5.26755	0.00301303	NA	NA	NA
Unknown	comp29754_c0_seq1	132.22	5.29036	0.00055433	NA	NA	NA
Unknown	comp38967_c0_seq1	14.7227	5.29585	1.06e-10	NA	NA	NA
Unknown	comp76596_c0_seq1	7.00269	5.30991	0.000154648	NA	NA	NA
Unknown	comp42348_c0_seq1	32.1497	5.31587	0.0054292	NA	NA	NA
Unknown	comp82478_c0_seq1	3.18259	5.31843	0.0135042	NA	NA	NA
Unknown	comp45780_c0_seq1	17.5882	5.34561	7.86e-05	NA	NA	NA
Unknown	comp47684_c0_seq1	8.00487	5.3699	1.78e-06	NA	NA	NA
Unknown	comp67736_c0_seq1	6.75841	5.37029	1.19e-05	NA	NA	NA
Unknown	comp15139_c0_seq1	187.226	5.38575	9.73e-09	NA	NA	NA
Unknown	comp72438_c0_seq1	3.33546	5.4326	0.00122727	NA	NA	NA
Unknown	comp6260_c0_seq1	359.753	5.45053	0.038557	NA	NA	NA
Unknown	comp78720_c0_seq1	3.18027	5.57982	0.00395109	NA	NA	NA
Unknown	comp82449_c0_seq1	12.0931	5.59822	2.22e-09	NA	NA	NA
Unknown	comp53781_c0_seq1	4.69957	5.60995	0.00016284	NA	NA	NA
Unknown	comp27397_c0_seq1	9.13875	5.62316	3.26e-06	NA	NA	NA
Unknown	comp73751_c0_seq1	6.07521	5.62637	9.52e-06	NA	NA	NA
Unknown	comp31935_c0_seq1	7.10767	5.63131	8.56e-07	NA	NA	NA
Unknown	comp79054_c0_seq1	3.93115	5.63142	0.00297921	NA	NA	NA
Unknown	comp5131_c0_seq1	297.764	5.63541	4.16e-22	NA	NA	NA
Unknown	comp38750_c0_seq1	3.3175	5.64226	0.00148868	NA	NA	NA
Unknown	comp9427_c0_seq1	9.56933	5.65948	0.000184639	NA	NA	NA
Unknown	comp78877_c0_seq1	2.88365	5.67345	0.00529578	NA	NA	NA
Unknown	comp22196_c0_seq1	51.0882	5.67959	0.000803824	NA	NA	NA
Unknown	comp23200_c0_seq1	46.1738	5.69021	2.91e-21	NA	NA	NA
Unknown	comp20642_c0_seq1	18.9416	5.69467	8.73e-14	NA	NA	NA
Unknown	comp49041_c0_seq1	2.96035	5.7122	0.00421337	NA	NA	NA
Unknown	comp59573_c0_seq1	14.4129	5.72999	3.16e-08	NA	NA	NA
Unknown	comp9820_c0_seq1	157.139	5.73899	2.8e-32	NA	NA	NA
Unknown	comp53299_c0_seq1	43.7496	5.7974	5.51e-11	NA	NA	NA
Unknown	comp3355_c0_seq1	702.105	5.80332	5.02e-39	NA	NA	NA
Unknown	comp22325_c0_seq1	3.70879	5.80676	0.00148732	NA	NA	NA
Unknown	comp18145_c0_seq1	160.752	5.83768	4.14e-33	NA	NA	NA
Unknown	comp21618_c0_seq1	16.3737	5.84122	2.31e-13	NA	NA	NA
Unknown	comp38096_c0_seq1	23.6859	5.85579	4.22e-05	NA	NA	NA
Unknown	comp44696_c0_seq1	40.3299	5.8649	1.37e-05	NA	NA	NA
Unknown	comp36028_c0_seq1	30.8885	5.88768	2.22e-07	NA	NA	NA
Unknown	comp83587_c0_seq1	5.7779	5.91457	3.27e-05	NA	NA	NA
Unknown	comp80526_c0_seq1	8.65089	5.92099	3.26e-08	NA	NA	NA
Unknown	comp36211_c0_seq1	11.6321	5.92207	2.7e-10	NA	NA	NA
Unknown	comp52831_c0_seq1	4.04515	5.93458	0.00024065	NA	NA	NA
Unknown	comp44748_c0_seq1	3.46368	5.94353	0.000564252	NA	NA	NA
Unknown	comp39610_c0_seq1	24.2136	5.98088	5.4e-16	NA	NA	NA
Unknown	comp85718_c0_seq1	2.55616	6.01849	0.0114717	NA	NA	NA
Unknown	comp2333_c0_seq1	520.332	6.01989	1.91e-39	NA	NA	NA
Unknown	comp27090_c0_seq1	42.976	6.0445	3.69e-22	NA	NA	NA
Unknown	comp27861_c0_seq1	47.1529	6.04779	8.76e-24	NA	NA	NA
Unknown	comp19280_c0_seq1	122.464	6.10731	4.48e-11	NA	NA	NA
Unknown	comp61392_c0_seq1	5.6191	6.15726	0.00131295	NA	NA	NA
Unknown	comp30514_c0_seq1	16.1457	6.25557	2.2e-13	NA	NA	NA
Unknown	comp19031_c0_seq1	24.3573	6.28233	9.56e-18	NA	NA	NA
Unknown	comp40334_c0_seq1	17.0568	6.29479	4.8e-14	NA	NA	NA
Unknown	comp14_c0_seq1	7249.43	6.29626	2.59e-12	NA	NA	NA
Unknown	comp78133_c0_seq1	21.6924	6.30711	7.12e-18	NA	NA	NA
Unknown	comp76253_c0_seq1	4.4884	6.31643	5.72e-05	NA	NA	NA
Unknown	comp70270_c0_seq1	4.54426	6.34194	0.000108233	NA	NA	NA
Unknown	comp48580_c0_seq1	13.0758	6.34251	1.37e-11	NA	NA	NA
Unknown	comp7259_c0_seq1	242.636	6.36848	0.000111331	NA	NA	NA
Unknown	comp66427_c0_seq1	10.9811	6.37271	2.6e-10	NA	NA	NA
Unknown	comp37825_c0_seq1	14.6501	6.39506	1.7e-07	NA	NA	NA
Unknown	comp25166_c0_seq1	28.0251	6.39934	8.49e-20	NA	NA	NA
Unknown	comp369_c0_seq1	250.978	6.46222	9.48e-30	NA	NA	NA
Unknown	comp18164_c0_seq1	86.0699	6.46651	0.0205451	NA	NA	NA
Unknown	comp2463_c0_seq1	93.7468	6.47295	4.94e-25	NA	NA	NA
Unknown	comp25190_c0_seq1	24.8583	6.47926	1.2e-13	NA	NA	NA
Unknown	comp1792_c0_seq1	177.361	6.52212	0.000834294	NA	NA	NA
Unknown	comp4809_c0_seq1	233.891	6.52896	2.18e-10	NA	NA	NA
Unknown	comp17743_c0_seq1	34.8662	6.55415	1.33e-22	NA	NA	NA
Unknown	comp1765_c0_seq1	792.538	6.57707	2.31e-24	NA	NA	NA
Unknown	comp31846_c0_seq1	20.5909	6.6329	2.54e-07	NA	NA	NA
Unknown	comp2555_c0_seq1	346.852	6.6476	0.000394123	NA	NA	NA
Unknown	comp56180_c0_seq1	23.0537	6.6483	3.04e-07	NA	NA	NA
Unknown	comp23238_c0_seq1	22.8478	6.65679	4.74e-19	NA	NA	NA
Unknown	comp89022_c0_seq1	6.92234	6.72136	3.98e-07	NA	NA	NA
Unknown	comp54237_c0_seq1	5.91279	6.72667	3.13e-06	NA	NA	NA
Unknown	comp85001_c0_seq1	6.38493	6.83133	9.5e-07	NA	NA	NA
Unknown	comp24696_c0_seq1	6.35464	6.83177	1.52e-06	NA	NA	NA
Unknown	comp1443_c0_seq1	301.072	6.95459	3.46e-10	NA	NA	NA
Unknown	comp3555_c0_seq1	68.7016	7.12024	3.76e-33	NA	NA	NA
Unknown	comp2077_c0_seq1	145.122	7.20748	5.22e-07	NA	NA	NA
Unknown	comp15913_c0_seq1	231.058	7.37322	0.00328252	NA	NA	NA
Unknown	comp21079_c0_seq1	60.6633	7.38966	0.000184862	NA	NA	NA
Unknown	comp32437_c0_seq1	90.7694	7.60082	0.0293092	NA	NA	NA
Unknown	comp44888_c0_seq1	48.0271	7.6732	1.48e-29	NA	NA	NA
Unknown	comp31080_c0_seq1	54.4632	7.9168	1.5e-31	NA	NA	NA
Unknown	comp13972_c0_seq1	61.3421	8.04432	3.46e-05	NA	NA	NA
Unknown	comp49014_c0_seq1	11.1527	8.16428	1.83e-11	NA	NA	NA
Unknown	comp46617_c0_seq1	29.7978	8.2998	1.49e-23	NA	NA	NA
Unknown	comp1288_c0_seq1	817.233	8.33827	0.00788062	NA	NA	NA
Unknown	comp32547_c0_seq1	546.142	8.33862	5.64e-62	NA	NA	NA
Unknown	comp862_c0_seq1	196.207	8.37192	1.61e-37	NA	NA	NA
Unknown	comp41006_c0_seq1	43.5409	8.37559	1.08e-29	NA	NA	NA
Unknown	comp9291_c0_seq1	22.7368	8.44843	2.37e-21	NA	NA	NA
Unknown	comp27023_c0_seq1	19.7352	8.47693	1.06e-18	NA	NA	NA
Unknown	comp59629_c0_seq1	14.7291	8.56701	9.48e-15	NA	NA	NA
Unknown	comp74078_c0_seq1	15.3402	8.62584	3.55e-15	NA	NA	NA
Unknown	comp7892_c0_seq1	227.306	8.91525	2.86e-55	NA	NA	NA
Unknown	comp8758_c0_seq1	172.447	8.93135	1.29e-06	NA	NA	NA
Unknown	comp11496_c0_seq1	19.9223	9.00391	3.06e-19	NA	NA	NA
Unknown	comp606_c0_seq1	281.505	9.30437	0.0160305	NA	NA	NA
Unknown	comp449_c0_seq1	496.294	9.43105	1.66e-36	NA	NA	NA
Unknown	comp16534_c0_seq1	83.5723	9.48855	0.0042073	NA	NA	NA
Unknown	comp1566_c0_seq1	38864.5	9.73904	3.29e-34	NA	NA	NA
Unknown	comp20088_c0_seq1	141.245	9.97678	2.18e-51	NA	NA	NA
Unknown	comp3905_c0_seq1	875.576	12.8799	3.56e-05	NA	NA	NA
Unknown	comp18730_c0_seq1	94.106	10000	1.27e-46	NA	NA	NA
Unknown	comp22458_c0_seq1	8.90673	10000	4.84e-11	NA	NA	NA
Unknown	comp23722_c0_seq1	3.33318	10000	0.000142297	NA	NA	NA
Unknown	comp24558_c0_seq1	3.7237	10000	3.06e-05	NA	NA	NA
Unknown	comp24695_c0_seq1	5.12359	10000	1.09e-07	NA	NA	NA
Unknown	comp37941_c0_seq1	3.2463	10000	0.00040903	NA	NA	NA
Unknown	comp3936_c0_seq1	8.53558	10000	1.41e-10	NA	NA	NA
Unknown	comp3975_c0_seq1	111.579	10000	7.23e-50	NA	NA	NA
Unknown	comp42546_c0_seq1	6.65309	10000	6.4e-09	NA	NA	NA
Unknown	comp47721_c0_seq1	2.71259	10000	0.00125596	NA	NA	NA
Unknown	comp48023_c0_seq1	2.79185	10000	0.000758028	NA	NA	NA
Unknown	comp51240_c0_seq1	4.17489	10000	2.49e-05	NA	NA	NA
Unknown	comp52353_c0_seq1	2.74255	10000	0.00262984	NA	NA	NA
Unknown	comp53547_c0_seq1	1.83767	10000	0.0258125	NA	NA	NA
Unknown	comp70209_c0_seq1	2.56914	10000	0.00121956	NA	NA	NA
Unknown	comp74648_c0_seq1	2.00061	10000	0.0170677	NA	NA	NA
Unknown	comp75437_c0_seq1	2.19908	10000	0.00597099	NA	NA	NA
Unknown	comp79733_c0_seq1	1.84253	10000	0.0209729	NA	NA	NA
Unknown	comp80866_c0_seq1	2.10457	10000	0.0193641	NA	NA	NA
Unknown	comp84631_c0_seq1	4.28471	10000	1.74e-05	NA	NA	NA
Unknown	comp86723_c0_seq1	1.81007	10000	0.018453	NA	NA	NA
Unknown	comp87016_c0_seq1	4.13666	10000	1.59e-05	NA	NA	NA
Unknown	comp88606_c0_seq1	1.79045	10000	0.0274351	NA	NA	NA
Unknown	comp92340_c0_seq1	2.01116	10000	0.00667045	NA	NA	NA
UPF0474 protein C5orf41	comp4047_c0_seq1	550.56	1.84641	0.0194568	Q8IUR6	8e-30	Homo sapiens
UPF0573 protein C2orf70	comp70707_c0_seq1	9.43497	4.0256	0.0041188	A6NJV1	5e-10	Homo sapiens
UPF0691 protein C9orf116 homolog	comp2359_c0_seq1	119.34	1.41398	0.0298137	B5X5D0	4e-18	Salmo salar
UPF0732 protein v1g81173	comp3314_c0_seq1	62.6714	1.89643	0.00152544	A7RHB3	1e-11	Nematostella vectensis
UPF0764 protein C16orf89	comp17158_c0_seq1	98.1494	1.80253	0.0136916	Q6UX73	2e-25	Homo sapiens
Urokinase plasminogen activator surface receptor	comp68660_c0_seq1	12.0071	-4.30161	0.0162933	P35456	1e-05	Mus musculus
Uromodulin	comp5005_c0_seq1	133.104	-2.56176	0.00223347	P27590	3e-24	Rattus norvegicus
Usherin	comp1179_c0_seq1	58.9976	-2.45643	0.0243256	Q2QI47	2e-16	Mus musculus
Usherin	comp12337_c0_seq1	89.9899	9.40362	9.17e-42	O75445	0.0002	Homo sapiens
Venom protein 164	comp6838_c0_seq1	48.2433	1.81908	0.0177967	P0CJ13	0.003	Lychas mucrotus
Very long-chain specific acyl-CoA dehydrogenase, mitochondrial	comp1679_c0_seq1	1377.63	1.87341	0.0318812	Q8HXY7	0	Macaca fascicularis
Vesicle-trafficking protein SEC22a	comp25595_c0_seq1	48.647	1.65014	0.0471736	Q4R866	0.002	Macaca fascicularis
Vesicular inhibitory amino acid transporter	comp29083_c0_seq1	157.766	5.42924	4.99e-18	Q6DIV6	9e-42	Xenopus (Silura) tropicalis
Vitellogenin	comp2044_c0_seq1	1800.26	-8.49402	1.01e-12	Q91062	2e-40	Ichthyomyzon unicuspis
Vitellogenin	comp337_c0_seq1	4286.43	1.55768	0.00674721	Q90243	3e-57	Acipenser transmontanus
Vitellogenin-2	comp103_c0_seq1	5241.36	1.76787	0.000411581	P02845	4e-26	Gallus gallus
Von Hippel-Lindau disease tumor suppressor	comp11060_c0_seq1	87.313	1.64958	0.00931202	P40337	2e-07	Homo sapiens
von Willebrand factor D and EGF domain-containing protein	comp3881_c0_seq1	114.259	-2.60129	0.00202712	Q8N2E2	2e-10	Homo sapiens
von Willebrand factor D and EGF domain-containing protein	comp12597_c0_seq1	188.563	2.28214	0.011572	Q8N2E2	6e-52	Homo sapiens
von Willebrand factor D and EGF domain-containing protein	comp12642_c0_seq1	38.1152	6.90486	0.0223137	Q8N2E2	7e-13	Homo sapiens
VWFA and cache domain-containing protein 1	comp12260_c0_seq1	83.8303	-3.24435	4.85e-05	Q6PDJ1	3e-11	Mus musculus
VWFA and cache domain-containing protein 1	comp6977_c0_seq1	422.413	-2.98588	0.000112076	Q5VU97	1e-42	Homo sapiens
VWFA and cache domain-containing protein 1	comp1172_c0_seq1	237.605	1.81859	0.00055433	Q6PDJ1	3e-137	Mus musculus
VWFA and cache domain-containing protein 1	comp42507_c0_seq1	15.4056	3.45798	0.00802533	Q6PDJ1	2e-58	Mus musculus
VWFA and cache domain-containing protein 1	comp24886_c0_seq1	35.8999	4.43682	8e-05	Q5VU97	6e-31	Homo sapiens
WD and tetratricopeptide repeats protein 1	comp7146_c0_seq1	371.521	1.91776	0.0169741	Q8N5D0	2e-112	Homo sapiens
WD and tetratricopeptide repeats protein 1	comp3592_c0_seq1	249.47	2.3546	7.84e-06	Q8N5D0	5e-53	Homo sapiens
WD repeat-containing protein 87	comp7297_c0_seq1	477.319	2.15963	2.57e-05	Q6ZQQ6	4e-05	Homo sapiens
Williams-Beuren syndrome chromosomal region 27 protein	comp4059_c0_seq1	156.668	3.10612	0.00371711	Q8N6F8	6e-10	Homo sapiens
Xaa-Pro aminopeptidase 1	comp23354_c0_seq1	41.8761	-3.72073	0.0188278	Q6P1B1	3e-57	Mus musculus
Zinc finger and BTB domain-containing protein 11	comp74757_c0_seq1	18.4414	-2.89831	0.0388811	O95625	9e-07	Homo sapiens
Zinc finger CCCH-type with G patch domain-containing protein	comp7578_c0_seq1	230.452	2.15037	0.000171738	A7SBN6	7e-106	Nematostella vectensis
Zinc metalloproteinase nas-13	comp27162_c0_seq1	40.4106	1.95184	0.00803862	Q20191	3e-15	Caenorhabditis elegans
Zinc metalloproteinase nas-13	comp15720_c0_seq1	224.49	2.58463	0.0170841	Q20191	2e-36	Caenorhabditis elegans
Zinc metalloproteinase nas-14	comp3388_c0_seq1	105.223	2.12845	0.00184436	Q19269	1e-38	Caenorhabditis elegans
Zinc metalloproteinase nas-15	comp21635_c0_seq1	167.581	1.87746	0.00189496	P55115	4e-39	Caenorhabditis elegans
Zinc metalloproteinase nas-4	comp15584_c0_seq1	57.7279	2.86967	2.16e-05	P55112	0.004	Caenorhabditis elegans
Zinc metalloproteinase nas-6	comp18997_c0_seq1	26.3656	3.2729	0.0293369	Q9U3S9	1e-10	Caenorhabditis elegans
Zinc metalloproteinase nas-6	comp12505_c0_seq1	133.499	3.46661	5.29e-13	Q9U3S9	5e-44	Caenorhabditis elegans
Zinc transporter ZIP14	comp23400_c0_seq1	29.9757	-4.67328	0.000377382	Q75N73	7e-18	Mus musculus
Zinc transporter ZIP6	comp21037_c0_seq1	61.5009	-3.333	0.00602703	Q4V887	6e-37	Rattus norvegicus
Zinc/RING finger protein 3	comp13674_c0_seq1	100.523	1.69384	0.01268	Q9ULT6	1e-46	Homo sapiens
