# Supplementary material for: RNA-seq Profiles of Immune Related Genes in the Staghorn Coral Acropora cervicornis Infected with White Band Disease
Source: PLoS One. 2013 Nov 21;8(11):e81821. doi: 10.1371/journal.pone.0081821 (PMC3836749; doi:10.1371/journal.pone.0081821)
Supplement: Table S2 — Dataset of annotated (E-val<10-5 ) non-coral transcripts exhibiting differential expression between healthy and diseased samples (adj p-val<0.05). (XLSX) [file pone.0081821.s002.xlsx]

## Sheet: Sheet1
Gene	id	baseMean	log2FoldChange	padj	Swiss	E	Org
14-3-3 protein 10	comp61118_c0_seq1	2.82163	6.2847	0.000126798	P93207	0.0001	Solanum lycopersicum
14-3-3 protein 3	comp44733_c0_seq1	37.4819	D only	4.31e-53	P42650	1e-17	Entamoeba histolytica
2-oxo-4-hydroxy-4-carboxy-5-ureidoimidazoline decarboxylase	comp38497_c0_seq1	15.7799	2.7467	0.00118141	Q0ZDF7	9e-28	Amia calva
40S ribosomal protein S0	comp48977_c0_seq1	415.988	12.2021	2.03e-18	A1D695	3e-32	Neosartorya fischeri NRRL 181
40S ribosomal protein S1	comp40542_c0_seq1	22.2255	D only	1.48e-37	P0CQ58	6e-08	Cryptococcus neoformans var. neoformans JEC21
40S ribosomal protein S10	comp28994_c0_seq1	184.966	D only	1.06e-123	O77082	2e-11	Dictyostelium discoideum
40S ribosomal protein S10	comp37143_c0_seq1	14.2321	D only	9.55e-27	P46783	4e-11	Homo sapiens
40S ribosomal protein S11	comp50555_c0_seq1	320.321	13.1334	8.92e-147	Q54S90	6e-42	Dictyostelium discoideum
40S ribosomal protein S13-2	comp47571_c0_seq1	26.5147	D only	1.85e-42	P59224	2e-24	Arabidopsis thaliana
40S ribosomal protein S15	comp35603_c0_seq1	270.922	12.3297	2.46e-138	Q945U1	3e-21	Elaeis oleifera
40S ribosomal protein S15a	comp40760_c0_seq1	328.252	D only	1.07e-149	Q6XIM8	2e-36	Drosophila yakuba
40S ribosomal protein S18	comp33176_c0_seq1	233.725	13.7491	8.28e-134	Q8IT98	5e-18	Argopecten irradians
40S ribosomal protein S19	comp43428_c0_seq1	42.3268	11.2834	2.7e-55	P40978	6e-21	Oryza sativa Japonica Group
40S ribosomal protein S2	comp76670_c0_seq1	3.9019	D only	2.52e-08	Q90YS3	5e-22	Ictalurus punctatus
40S ribosomal protein S20	comp26184_c0_seq1	139.95	D only	5.3e-114	P23403	5e-17	Xenopus laevis
40S ribosomal protein S20	comp70012_c0_seq1	1.36473	D only	0.0402455	P55828	2e-17	Drosophila melanogaster
40S ribosomal protein S23	comp40903_c0_seq1	25.5399	D only	2.17e-41	P46297	7e-21	Fragaria x ananassa
40S ribosomal protein S24	comp43098_c0_seq1	61.346	10.8185	5.83e-72	Q962Q6	1e-08	Spodoptera frugiperda
40S ribosomal protein S25	comp36404_c0_seq1	118.701	12.7715	1.17e-105	Q7SC06	0.0005	Neurospora crassa OR74A
40S ribosomal protein S26	comp40180_c0_seq1	2.33953	D only	0.000234058	Q9BHU1	2e-18	Sterkiella nova
40S ribosomal protein S26-A	comp33301_c0_seq1	263.934	12.854	8.83e-139	Q9UT56	7e-20	Schizosaccharomyces pombe 972h-
40S ribosomal protein S28	comp31786_c0_seq1	87.6736	12.3343	2.76e-89	Q95Y04	3e-06	Caenorhabditis elegans
40S ribosomal protein S3	comp45468_c0_seq1	83.6533	D only	2.34e-93	Q06559	3e-15	Drosophila melanogaster
40S ribosomal protein S30-B	comp51583_c0_seq1	135.639	11.3313	1.13e-109	P0CX34	2e-09	Saccharomyces cerevisiae S288c
40S ribosomal protein S3a	comp38735_c0_seq1	221.119	10.7495	3.38e-24	Q23DE3	4e-24	Tetrahymena thermophila
40S ribosomal protein S4	comp30999_c0_seq1	100.81	D only	5.22e-100	Q6PBC4	8e-29	Xenopus (Silurana) tropicalis
40S ribosomal protein S5	comp88006_c0_seq1	8.75125	D only	1.15e-17	Q7RVI1	1e-25	Neurospora crassa OR74A
40S ribosomal protein S5-2	comp49897_c0_seq1	258.128	D only	1.23e-139	P51427	1e-18	Arabidopsis thaliana
40S ribosomal protein S6	comp54662_c0_seq1	8.77323	D only	1.15e-17	Q6FJH3	3e-19	Candida glabrata CBS 138
40S ribosomal protein S7	comp67321_c0_seq1	83.8068	12.2692	1.34e-91	P62083	3e-10	Rattus norvegicus
40S ribosomal protein S8-1	comp28286_c0_seq1	65.9955	D only	1.01e-72	Q93VG5	8e-26	Arabidopsis thaliana
40S ribosomal protein S8-B	comp34049_c0_seq1	175.638	13.3369	6.69e-122	Q9P7B2	8e-14	Schizosaccharomyces pombe 972h-
40S ribosomal protein S9-1	comp58522_c0_seq1	69.4985	D only	5.15e-86	Q9LXG1	5e-11	Arabidopsis thaliana
40S ribosomal protein S9-2	comp20371_c0_seq1	77.6448	D only	6.72e-90	Q9FLF0	2e-15	Arabidopsis thaliana
40S ribosomal protein S9-2	comp35337_c0_seq1	24.1751	D only	7.6e-40	Q9FLF0	2e-15	Arabidopsis thaliana
60S ribosomal protein L11	comp25773_c0_seq1	364.56	12.5214	1.19e-150	P24119	2e-54	Tetrahymena thermophila
60S ribosomal protein L12	comp27369_c0_seq1	42.5014	D only	3.71e-57	O75000	3e-09	Schizosaccharomyces pombe 972h-
60S ribosomal protein L12	comp53937_c0_seq1	73.1934	D only	5.47e-88	P61866	4e-08	Caenorhabditis elegans
60S ribosomal protein L12-3	comp91620_c0_seq1	10.7506	D only	1.19e-18	Q9FF52	2e-20	Arabidopsis thaliana
60S ribosomal protein L17-B	comp52075_c0_seq1	141.001	12.0197	3.72e-111	P46990	3e-08	Saccharomyces cerevisiae S288c
60S ribosomal protein L18-2	comp27486_c0_seq1	254.454	13.8717	2.9e-137	P42791	3e-27	Arabidopsis thaliana
60S ribosomal protein L18a	comp31356_c0_seq1	27.4895	D only	1.69e-43	P62718	3e-12	Rattus norvegicus
60S ribosomal protein L19-1	comp52878_c0_seq1	272.355	11.4937	5.21e-12	Q9SRX2	6e-06	Arabidopsis thaliana
60S ribosomal protein L21	comp31511_c0_seq1	709.613	13.3157	1.09e-176	Q54X53	1e-28	Dictyostelium discoideum
60S ribosomal protein L22	comp40279_c0_seq1	102.061	D only	6.23e-101	P13732	1e-06	Tripneustes gratilla
60S ribosomal protein L23	comp47558_c0_seq1	523.139	11.4256	2.83e-09	Q07760	1e-31	Nicotiana tabacum
60S ribosomal protein L27a	comp19725_c0_seq1	179.581	13.3689	3.95e-122	Q00454	3e-39	Tetrahymena thermophila
60S ribosomal protein L30	comp33571_c0_seq1	165.18	10.5332	2.39e-20	Q7S7F1	8e-22	Neurospora crassa OR74A
60S ribosomal protein L32	comp28941_c0_seq1	226.893	D only	2.19e-134	Q55AB5	2e-08	Dictyostelium discoideum
60S ribosomal protein L32	comp47657_c0_seq1	134.131	D only	1.26e-112	P62912	7e-12	Rattus norvegicus
60S ribosomal protein L33-A	comp74790_c0_seq1	65.618	D only	9.27e-84	P05744	7e-13	Saccharomyces cerevisiae S288c
60S ribosomal protein L35-4	comp34235_c0_seq1	98.5245	11.1502	1.48e-96	Q9LZ41	2e-08	Arabidopsis thaliana
60S ribosomal protein L35a-3	comp66018_c0_seq1	3.11937	D only	3.93e-06	Q9C912	1e-12	Arabidopsis thaliana
60S ribosomal protein L36-A	comp28214_c0_seq1	94.5414	10.4066	1.34e-91	Q92365	7e-09	Schizosaccharomyces pombe 972h-
60S ribosomal protein L37a	comp44420_c0_seq1	198.768	13.5154	6.18e-127	O61598	2e-21	Ostertagia ostertagi
60S ribosomal protein L3-A	comp41290_c0_seq1	19.0594	D only	8.52e-34	P40372	8e-19	Schizosaccharomyces pombe 972h-
60S ribosomal protein L44	comp45733_c0_seq1	134.655	10.1526	7.43e-108	P48166	5e-10	Caenorhabditis elegans
60S ribosomal protein L44	comp68062_c0_seq1	2.45872	7.16648	0.000557653	P90702	3e-07	Brugia malayi
60S ribosomal protein L6-1	comp28717_c0_seq1	32.5584	D only	1.35e-48	Q9FZ76	4e-05	Arabidopsis thaliana
60S ribosomal protein L7-3	comp29841_c0_seq1	46.5956	D only	2.81e-60	P60039	3e-31	Arabidopsis thaliana
60S ribosomal protein L7-3	comp52815_c0_seq1	162.979	D only	1.02e-120	P60039	2e-19	Arabidopsis thaliana
60S ribosomal protein L8	comp68674_c0_seq1	4.52438	D only	6.9e-13	Q9XVF7	4e-26	Caenorhabditis elegans
60S ribosomal protein L8-1	comp35732_c0_seq1	51.4511	D only	1.59e-65	P46286	8e-41	Arabidopsis thaliana
60S ribosomal protein L9	comp47590_c0_seq1	72.1112	12.0523	4.34e-85	P30707	8e-08	Pisum sativum
60S ribosomal protein L9	comp70974_c0_seq1	2.14457	D only	0.000653701	Q54XI5	1e-07	Dictyostelium discoideum
60S ribosomal protein L9	comp82168_c0_seq1	48.0089	11.4652	1.17e-69	Q54XI5	5e-12	Dictyostelium discoideum
Abnormal spindle-like microcephaly-associated protein homolog	comp37661_c0_seq1	43.8801	2.28614	6.13e-05	P62294	1e-47	Pongo pygmaeus
Activating molecule in BECN1-regulated autophagy protein 1	comp5794_c0_seq1	179.549	2.61732	0.00021887	A2AH22	8e-34	Mus musculus
Acyl-coenzyme A dehydrogenase	comp37139_c0_seq1	46.3749	D only	7.15e-55	Q8X7R2	3e-18	Escherichia coli O157:H7
Adenosylhomocysteinase	comp53502_c0_seq1	18.4499	D only	9.76e-33	P93253	1e-23	Mesembryanthemum crystallinum
ADP,ATP carrier protein	comp24957_c0_seq1	75.0599	D only	1.96e-77	P31692	1e-33	Parachlorella kessleri
ADP-ribosyl cyclase	comp53195_c0_seq1	18.6326	5.01053	4.31e-07	Q27312	2e-07	Aplysia kurodai
ADP-ribosylation factor-like protein 16	comp26231_c0_seq1	15.245	2.80012	0.00377529	Q0P5N6	5e-11	Homo sapiens
Alpha-centractin	comp10505_c0_seq1	25.4572	2.48013	0.00581045	P85515	4e-21	Rattus norvegicus
Aminopeptidase O	comp29074_c0_seq1	33.8565	2.09172	0.0329896	P69527	3e-28	Rattus norvegicus
Aspartate aminotransferase, cytoplasmic	comp30326_c0_seq1	26.6629	D only	8.18e-43	P28734	9e-18	Daucus carota
Aspartate aminotransferase, cytoplasmic	comp64888_c0_seq1	22.8104	D only	2.95e-38	O42652	9e-16	Schizosaccharomyces pombe 972h-
ATP synthase subunit alpha	comp43756_c0_seq1	29.5406	D only	5.31e-46	B1LVH1	2e-22	Methylobacterium radiotolerans JCM 2831
ATP synthase subunit beta	comp74651_c0_seq1	3.17952	D only	8.17e-08	Q0AUD3	1e-30	Syntrophomonas wolfei subsp. wolfei str. Goettingen
ATP synthase subunit beta, mitochondrial	comp34792_c0_seq1	47.6039	D only	4.24e-63	Q05825	5e-37	Drosophila melanogaster
Attractin-like protein 1	comp86424_c0_seq1	6.12306	3.47335	0.0289791	Q6A051	2e-06	Mus musculus
Calcium/calmodulin-dependent protein kinase type II alpha chain	comp18392_c0_seq1	107.208	4.77597	0.000521127	Q00168	2e-46	Drosophila melanogaster
Calpain-5	comp48026_c0_seq1	12.3638	3.1129	0.00253541	O08688	1e-14	Mus musculus
Capsid protein	comp63634_c0_seq1	10.8638	3.79388	2.24e-07	Q8V7G3	0.007	Torque teno virus Human/China/CT39F/2001
Cathepsin B-like CP3	comp93987_c0_seq1	5.58263	D only	1.32e-09	P92133	1e-10	Giardia intestinalis
Cathepsin B-like cysteine proteinase 1	comp64808_c0_seq1	37.8224	D only	2.5e-53	P25802	3e-10	Ostertagia ostertagi
Cathepsin D	comp40652_c0_seq1	40.1619	D only	2.72e-55	Q9MZS8	2e-08	Ovis aries
Cathepsin L	comp61209_c0_seq1	2.92441	D only	1.09e-05	Q26636	2e-15	Sarcophaga peregrina
Cathepsin Z	comp47704_c0_seq1	30.2189	D only	2.62e-46	Q9WUU7	0.0005	Mus musculus
CD97 antigen	comp84719_c0_seq1	11.0172	4.08624	0.00441095	Q9Z0M6	2e-05	Mus musculus
Coiled-coil-helix-coiled-coil-helix domain-containing protein 7	comp22896_c0_seq1	23.3457	2.60956	0.00226342	Q8SPI2	3e-07	Macaca fascicularis
Contactin-associated protein-like 5	comp71040_c0_seq1	6.72878	4.96717	0.00860103	Q0V8S9	0.006	Gallus gallus
Cysteine proteinase 3	comp15994_c0_seq1	88.9021	D only	7.17e-84	Q40143	1e-08	Solanum lycopersicum
Cysteine proteinase 3	comp6728_c0_seq1	115.612	D only	4.58e-94	Q40143	3e-05	Solanum lycopersicum
Cysteine proteinase RD21a	comp28333_c0_seq1	67.0665	D only	3.07e-73	P43297	7e-21	Arabidopsis thaliana
Cytochrome c	comp43083_c0_seq1	2.04843	D only	0.000637167	Q6QLW4	2e-09	Pectinaria gouldii
Cytochrome c oxidase subunit 1	comp66062_c0_seq1	29.0268	D only	7.98e-34	P00400	7e-18	Drosophila yakuba
Cytosolic carboxypeptidase 6	comp29369_c0_seq1	107.959	2.74976	0.00185679	Q5VU57	1e-170	Homo sapiens
Degenerin unc-8	comp54558_c0_seq1	8.11192	4.15411	0.00126131	Q21974	7e-10	Caenorhabditis elegans
Digestive cysteine proteinase 2	comp3038_c0_seq1	1140.81	D only	9.43e-187	P25782	2e-54	Homarus americanus
Dimethylaniline monooxygenase [N-oxide-forming] 2	comp48614_c0_seq1	10.0207	4.57464	2.22e-07	Q6IRI9	8e-14	Rattus norvegicus
DNA-directed RNA polymerases I, II, and III subunit RPABC1	comp17001_c0_seq1	22.9073	2.31335	0.000898432	B0BNE2	2e-30	Rattus norvegicus
E3 ubiquitin-protein ligase RNF14	comp45650_c0_seq1	20.1261	4.37428	7.06e-06	Q9UBS8	1e-15	Homo sapiens
E3 ubiquitin-protein ligase RNF14	comp56624_c0_seq1	19.0496	3.8126	0.00367175	Q9UBS8	2e-18	Homo sapiens
E3 ubiquitin-protein ligase RNF14	comp77918_c0_seq1	8.18317	3.89882	0.000898432	Q9UBS8	3e-20	Homo sapiens
Elongation factor 1-alpha	comp20176_c0_seq1	32.6578	10.909	1.16e-51	P14963	4e-29	Euglena gracilis
Elongation factor 1-alpha	comp25361_c0_seq1	7.94797	D only	1.89e-16	P25166	1e-22	Stylonychia lemnae
Elongation factor 1-alpha 1	comp23450_c0_seq1	117.016	D only	1.61e-93	P62630	2e-38	Rattus norvegicus
Elongation factor 2	comp35061_c0_seq1	7.8038	D only	1.21e-16	Q90705	2e-17	Gallus gallus
Elongation factor Tu GTP-binding domain-containing protein 1	comp38831_c0_seq1	11.8206	2.29254	0.0251152	Q8C0D5	3e-21	Mus musculus
Elongation factor Tu GTP-binding domain-containing protein 1	comp71016_c0_seq1	5.69396	3.6585	0.0158699	Q7Z2Z2	1e-14	Homo sapiens
Enolase	comp37382_c0_seq1	35.0929	D only	6.14e-51	Q7RA60	3e-13	Plasmodium yoelii yoelii
Eukaryotic translation initiation factor 5A-2	comp35522_c0_seq1	71.86	D only	3.04e-86	Q9AXQ5	8e-14	Solanum lycopersicum
Fanconi anemia group I protein	comp65101_c0_seq1	5.90804	4.22059	0.00221167	Q9NVI1	2e-15	Homo sapiens
Follicle-stimulating hormone receptor	comp73913_c0_seq1	9.09701	3.13785	0.0031646	Q5GJ04	8e-22	Felis catus
Fructose-bisphosphate aldolase, cytoplasmic isozyme	comp7849_c0_seq1	584.69	D only	9.84e-160	P29356	2e-84	Spinacia oleracea
Fucoxanthin-chlorophyll a-c binding protein F, chloroplastic	comp14893_c0_seq1	197.151	D only	1.89e-113	Q41094	8e-60	Phaeodactylum tricornutum
Fucoxanthin-chlorophyll a-c binding protein, chloroplastic	comp10490_c0_seq1	354.529	12.7178	1.5e-134	Q42395	3e-60	Odontella sinensis
Fumarate hydratase, mitochondrial	comp48464_c0_seq1	23.5902	D only	3.62e-39	P14408	9e-16	Rattus norvegicus
G/T mismatch-specific thymine DNA glycosylase	comp25677_c0_seq1	18.7954	2.58358	0.000507557	P56581	6e-06	Mus musculus
Glutamate carboxypeptidase 2	comp22372_c0_seq1	33.2137	3.10789	0.0481282	P70627	7e-08	Rattus norvegicus
Glyceraldehyde-3-phosphate dehydrogenase	comp13264_c0_seq1	524.645	D only	1.47e-155	O59841	3e-106	Ogataea parapolymorpha DL-1
Glycoprotein gp2	comp48504_c0_seq1	28.6136	1.81823	0.00500631	P28968	3e-07	Equine herpesvirus type 1 (strain AB4P)
Guanine nucleotide-binding protein subunit beta-2-like 1	comp22452_c0_seq1	58.0022	D only	4.68e-68	O42248	4e-44	Danio rerio
HEAT repeat-containing protein 1	comp32757_c0_seq1	20.7684	2.50789	0.0210404	Q9H583	2e-48	Homo sapiens
Heat shock 70 kDa protein	comp55348_c0_seq1	94.8476	9.97082	6.88e-10	P41753	6e-05	Achlya klebsiana
Histidine-rich glycoprotein	comp24285_c0_seq1	162.792	D only	9.55e-108	P04929	9e-07	Plasmodium lophurae
Histidine-rich glycoprotein	comp59184_c0_seq1	33.3383	D only	2.5e-49	P04929	0.002	Plasmodium lophurae
Histone H3-8	comp12587_c0_seq1	44.1215	D only	4.96e-62	P81202	6e-22	Stylonychia lemnae
Isocitrate lyase	comp16863_c0_seq1	146.026	D only	2.35e-103	Q8J232	2e-44	Magnaporthe oryzae 70-15
Isocitrate lyase	comp25320_c0_seq1	56.3436	D only	6.16e-67	P17069	2e-24	Gossypium hirsutum
Kelch-like ECH-associated protein 1	comp18707_c0_seq1	38.8193	2.38556	1.36e-05	Q5R774	5e-15	Pongo abelii
Keratin-associated protein 10-6	comp18173_c0_seq1	71.4038	2.61399	3.68e-08	P60371	2e-17	Homo sapiens
Leucine-rich repeat-containing protein 6	comp35850_c0_seq1	10.9963	3.0952	0.000648327	Q4R3F0	2e-47	Macaca fascicularis
Malate dehydrogenase	comp21053_c0_seq1	180.006	D only	5.24e-112	A5WGM2	4e-62	Psychrobacter sp. PRwf-1
Malate dehydrogenase	comp25838_c0_seq1	74.475	D only	3.83e-77	Q5NYA9	5e-29	Aromatoleum aromaticum EbN1
Malate dehydrogenase	comp92988_c0_seq1	1.57311	D only	9.26e-05	Q47TT4	5e-14	Thermobifida fusca YX
MFS-type transporter C6orf192	comp56036_c0_seq1	9.29787	2.60409	0.0401401	Q6NT16	1e-12	Homo sapiens
Mitochondrial substrate carrier family protein ancA	comp11767_c0_seq1	62.8762	10.7837	1.81e-69	O97470	3e-18	Dictyostelium discoideum
Mitochondrial substrate carrier family protein ancA	comp72722_c0_seq1	2.53717	D only	2.96e-05	O97470	5e-26	Dictyostelium discoideum
Mitochondrial substrate carrier family protein ancA	comp80544_c0_seq1	2.53449	D only	8.39e-05	O97470	2e-22	Dictyostelium discoideum
Mucin-2	comp14547_c0_seq1	208.608	D only	9.51e-118	Q62635	0.005	Rattus norvegicus
NA	comp10077_c0_seq1	41.9168	2.77077	0.00242724			NA
NA	comp10108_c0_seq1	28.9532	5.85633	2.31e-38			NA
NA	comp10161_c0_seq1	32.355	3.17345	0.00828452			NA
NA	comp11826_c0_seq1	70.5758	D only	3.86e-75			NA
NA	comp12006_c0_seq1	50.9148	5.87175	6.35e-07			NA
NA	comp12035_c0_seq1	184.042	10.365	1.51e-116			NA
NA	comp12330_c0_seq1	81.5798	D only	2.67e-78			NA
NA	comp125_c0_seq1	3529.14	2.19938	0.000384592			NA
NA	comp12641_c0_seq1	60.6328	D only	1.44e-69			NA
NA	comp13191_c0_seq1	196.185	8.38783	0.000187375			NA
NA	comp13351_c0_seq1	23.6796	3.3132	0.0273376			NA
NA	comp13410_c0_seq1	48.1174	8.43977	3.97e-67			NA
NA	comp13608_c0_seq1	49.1718	6.43402	3.33e-05			NA
NA	comp13878_c0_seq1	35.2228	3.18879	0.000109279			NA
NA	comp13880_c0_seq1	162.647	5.06746	4.83e-08			NA
NA	comp14106_c0_seq1	17.5975	2.55	0.0212185			NA
NA	comp14475_c0_seq1	92.0215	D only	3.56e-85			NA
NA	comp14659_c0_seq1	69.2695	2.8235	2.48e-08			NA
NA	comp1470_c0_seq1	257.586	3.7855	0.000751689			NA
NA	comp14855_c0_seq1	173.788	10.25	0.012279			NA
NA	comp14888_c0_seq1	43.8021	2.44037	0.00919885			NA
NA	comp14974_c0_seq1	16.0917	3.05481	7.16e-06			NA
NA	comp15354_c0_seq1	10.9147	2.35958	0.0201502			NA
NA	comp16201_c0_seq1	43.4478	5.767	7.88e-18			NA
NA	comp16399_c0_seq1	23.9816	4.446	4.64e-05			NA
NA	comp16433_c0_seq1	9.89868	3.4379	0.0125831			NA
NA	comp16612_c0_seq1	9.24812	H only	0.00421694	NA	10000	NA
NA	comp16846_c0_seq1	26.9843	3.21665	8.64e-08			NA
NA	comp1687_c0_seq1	234.034	5.57142	0.00547624			NA
NA	comp16911_c0_seq1	34.139	3.55554	1.29e-12			NA
NA	comp17169_c0_seq1	17.7576	3.31548	0.000357274			NA
NA	comp18414_c0_seq1	173.929	D only	7.23e-123			NA
NA	comp18605_c0_seq1	11.6068	2.28231	0.00552514			NA
NA	comp18772_c0_seq1	65.3543	D only	6.63e-69			NA
NA	comp18780_c0_seq1	37.8857	3.05456	0.0453724			NA
NA	comp19063_c0_seq1	90.0782	D only	1.42e-82			NA
NA	comp19069_c0_seq1	38.2123	D only	1.17e-53			NA
NA	comp19233_c0_seq1	13.311	2.15502	0.00570927			NA
NA	comp19461_c0_seq1	2.05054	D only	5.01e-05			NA
NA	comp19565_c0_seq1	144.076	D only	8.01e-103			NA
NA	comp19866_c0_seq1	21.6099	2.85266	3.33e-05			NA
NA	comp20034_c0_seq1	9.23911	3.80139	4.38e-05			NA
NA	comp20341_c0_seq1	10.6842	2.30173	0.0334571			NA
NA	comp20657_c0_seq1	16.5409	2.59919	0.00108177			NA
NA	comp20835_c0_seq1	51.5178	D only	3.81e-59			NA
NA	comp20850_c0_seq1	5.76236	3.27122	0.00532035			NA
NA	comp21377_c0_seq1	16.525	2.78124	2.09e-05			NA
NA	comp21436_c0_seq1	17.1563	2.11983	0.0299939			NA
NA	comp21643_c0_seq1	138.487	D only	2.08e-99			NA
NA	comp22635_c0_seq1	10.5064	4.61525	8.17e-08			NA
NA	comp22742_c0_seq1	15.7594	2.8454	0.0130712			NA
NA	comp22927_c0_seq1	21.5956	2.97173	0.0015516			NA
NA	comp23241_c0_seq1	14.3773	4.16248	1.84e-08			NA
NA	comp23484_c0_seq1	70.0906	D only	9.31e-81			NA
NA	comp23490_c0_seq1	23.3342	3.07038	2.19e-06			NA
NA	comp23611_c0_seq1	10.3349	3.20413	0.00119116			NA
NA	comp23734_c0_seq1	29.6199	3.53245	0.02778			NA
NA	comp24156_c0_seq1	10.8213	6.74886	2.75e-17			NA
NA	comp24325_c0_seq1	19.1873	3.48118	9.74e-08			NA
NA	comp24348_c0_seq1	29.7579	3.38354	5.67e-08			NA
NA	comp24488_c0_seq1	7.36276	2.48189	0.00110254			NA
NA	comp24489_c0_seq1	10.2144	4.37545	1.4e-05			NA
NA	comp24732_c0_seq1	9.66885	6.02973	0.00138985			NA
NA	comp24947_c0_seq1	19.2846	5.80199	3.54e-08			NA
NA	comp25248_c0_seq1	33.2319	3.96434	1.6e-14			NA
NA	comp25571_c0_seq1	9.45537	2.93147	0.0432626			NA
NA	comp25925_c0_seq1	13.0811	2.56309	0.0201502			NA
NA	comp25960_c0_seq1	14.1871	3.04	1.35e-05			NA
NA	comp25986_c0_seq1	6.41603	5.44859	0.000827546			NA
NA	comp26280_c0_seq1	44.2561	D only	1.6e-58			NA
NA	comp26808_c0_seq1	5.92012	3.25987	0.0155856			NA
NA	comp27038_c0_seq1	17.6412	5.32135	0.00305941			NA
NA	comp27115_c0_seq1	36.8799	3.82931	0.00692616			NA
NA	comp27153_c0_seq1	6.7925	3.77505	0.00074703			NA
NA	comp27165_c0_seq1	56.0844	D only	5.49e-62			NA
NA	comp273_c0_seq1	86.45	D only	6.38e-80			NA
NA	comp27317_c0_seq1	114.442	D only	1.14e-93			NA
NA	comp27374_c0_seq1	42.9312	D only	2.21e-52			NA
NA	comp27392_c0_seq1	12.6877	2.31215	0.0205824			NA
NA	comp27455_c0_seq1	65.3118	D only	2.88e-72			NA
NA	comp27461_c0_seq1	22.5149	1.91428	4.93e-05			NA
NA	comp27485_c0_seq1	29.829	D only	6.41e-46			NA
NA	comp27565_c0_seq1	32.4284	-2.12718	0.02778			NA
NA	comp27863_c0_seq1	10.9266	3.70513	0.0107211			NA
NA	comp27938_c0_seq1	64.5338	10.2589	3.36e-79			NA
NA	comp28039_c0_seq1	33.9492	2.54882	0.00026327			NA
NA	comp2811_c0_seq1	90.0882	3.69847	2.63e-15			NA
NA	comp28413_c0_seq1	90.2668	D only	1.9e-84			NA
NA	comp28532_c0_seq1	52.3028	D only	2.64e-55			NA
NA	comp29073_c0_seq1	15.1519	2.62305	0.00140192			NA
NA	comp29115_c0_seq1	14.6799	2.19134	0.0308703			NA
NA	comp29315_c0_seq1	16.7478	2.24717	0.0121492			NA
NA	comp29463_c0_seq1	14.7089	3.0905	5e-06			NA
NA	comp29757_c0_seq1	52.0545	D only	4.03e-64			NA
NA	comp30067_c0_seq1	171.145	9.11365	2.9e-16			NA
NA	comp30151_c0_seq1	17.0803	2.51343	0.0401401			NA
NA	comp30521_c0_seq1	11.603	3.13117	0.000250742			NA
NA	comp30575_c0_seq1	20.0404	4.22502	0.0361537			NA
NA	comp3118_c0_seq1	938.774	6.81732	1.55e-15			NA
NA	comp31240_c0_seq1	6.60089	D only	6.67e-18			NA
NA	comp31263_c0_seq1	37.4325	D only	5.37e-53			NA
NA	comp31276_c0_seq1	194.474	12.4133	3.63e-126			NA
NA	comp31366_c0_seq1	39.772	D only	5.69e-55			NA
NA	comp31607_c0_seq1	21.9593	8.23619	6.51e-31			NA
NA	comp31622_c0_seq1	83.8768	3.52676	0.0188184			NA
NA	comp31675_c0_seq1	33.5206	D only	3.22e-44			NA
NA	comp318_c0_seq1	4682.64	5.24435	5.79e-35			NA
NA	comp31814_c0_seq1	34.508	D only	2.09e-50			NA
NA	comp31867_c0_seq1	31.1937	D only	2.85e-47			NA
NA	comp31996_c0_seq1	4.61206	7.00218	1.65e-11			NA
NA	comp3200_c0_seq1	4297.74	12.0584	9.71e-16			NA
NA	comp32281_c0_seq1	17.2444	2.48632	0.00248731			NA
NA	comp32521_c0_seq1	6.96325	3.09512	0.00461022			NA
NA	comp32582_c0_seq1	4.19437	4.81421	0.00165678			NA
NA	comp32681_c0_seq1	59.7992	D only	1.44e-57			NA
NA	comp32683_c0_seq1	17.5596	D only	1.34e-38			NA
NA	comp33001_c0_seq1	41.7216	D only	1.54e-56			NA
NA	comp33195_c0_seq1	36.6526	D only	2.53e-52			NA
NA	comp33293_c0_seq1	30.9988	D only	4.41e-47			NA
NA	comp33569_c0_seq1	35.6615	D only	4.48e-39			NA
NA	comp33752_c0_seq1	44.451	D only	1.14e-58			NA
NA	comp33780_c0_seq1	100.313	D only	1.83e-100			NA
NA	comp33788_c0_seq1	12.0459	2.38781	0.0200401			NA
NA	comp33819_c0_seq1	13.678	D only	1.04e-21			NA
NA	comp3452_c0_seq1	35.6115	2.29974	0.0449863			NA
NA	comp34545_c0_seq1	14.6742	2.78993	0.000344679			NA
NA	comp34574_c0_seq1	13.1289	8.52018	3.35e-21			NA
NA	comp34933_c0_seq1	24.5634	2.78398	0.0417295			NA
NA	comp34942_c0_seq1	22.0008	3.8894	3.82e-11			NA
NA	comp35093_c0_seq1	36.8476	D only	1.73e-52			NA
NA	comp35357_c0_seq1	40.9418	D only	6.44e-56			NA
NA	comp35506_c0_seq1	40.4003	11.2161	4.78e-42			NA
NA	comp35507_c0_seq1	299.234	14.1056	5.85e-144			NA
NA	comp3588_c0_seq1	68.3511	3.13789	0.0265147			NA
NA	comp36565_c0_seq1	3.55979	D only	1.39e-08			NA
NA	comp36994_c0_seq1	15.5834	2.47565	0.0011827			NA
NA	comp37310_c0_seq1	24.1094	D only	1.37e-38			NA
NA	comp37350_c0_seq1	7.48442	7.06072	0.00571136			NA
NA	comp37763_c0_seq1	7.37049	3.75967	0.000664937			NA
NA	comp37952_c0_seq1	27.0995	D only	4.41e-43			NA
NA	comp38189_c0_seq1	40.9418	D only	6.44e-56			NA
NA	comp38437_c0_seq1	13.2934	3.517	0.000232701			NA
NA	comp38670_c0_seq1	17.0632	3.24393	0.00797763			NA
NA	comp38706_c0_seq1	11.23	3.63367	7.39e-11			NA
NA	comp3876_c0_seq1	241.619	6.162	0.000160845			NA
NA	comp39723_c0_seq1	16.8174	2.49528	0.00117306			NA
NA	comp39967_c0_seq1	8.92345	2.97263	0.00571421			NA
NA	comp39970_c0_seq1	21.5543	4.48085	0.000797018			NA
NA	comp40118_c0_seq1	5.6717	3.53426	0.0137481			NA
NA	comp40124_c0_seq1	5.25446	3.06703	0.00888544			NA
NA	comp40297_c0_seq1	10.3052	3.22043	0.00155			NA
NA	comp40475_c0_seq1	8.39135	4.73522	1.09e-08			NA
NA	comp40559_c0_seq1	25.0412	2.29949	0.00637192			NA
NA	comp40643_c0_seq1	12.0711	4.55696	0.00341916			NA
NA	comp40857_c0_seq1	9.57676	2.85674	0.0125831			NA
NA	comp40863_c0_seq1	6.21295	3.74678	0.00120387			NA
NA	comp40901_c0_seq1	35.0929	D only	6.14e-51			NA
NA	comp4096_c0_seq1	56.1785	3.69385	0.00016658			NA
NA	comp40981_c0_seq1	31.7585	6.27415	1.25e-05			NA
NA	comp41047_c0_seq1	29.4481	D only	9.73e-42			NA
NA	comp41077_c0_seq1	34.1181	D only	4.72e-50			NA
NA	comp41645_c0_seq1	11.5563	2.35602	0.0179616			NA
NA	comp41799_c0_seq1	6.24719	3.84501	0.00019374			NA
NA	comp42043_c0_seq1	16.6783	4.07866	3.72e-11			NA
NA	comp42144_c0_seq1	1.13647	D only	0.00300796			NA
NA	comp42160_c0_seq1	17.766	5.54254	5.21e-17			NA
NA	comp4232_c0_seq1	4217.01	12.5515	8.74e-12			NA
NA	comp42542_c0_seq1	23.8141	4.86346	1.85e-10			NA
NA	comp43381_c0_seq1	35.2879	D only	4.14e-51			NA
NA	comp43508_c0_seq1	14.3292	3.61072	0.0104624			NA
NA	comp43703_c0_seq1	7.41653	4.36074	0.000178378			NA
NA	comp44098_c0_seq1	9.30095	5.64948	1.25e-11			NA
NA	comp44127_c0_seq1	7.48988	3.82693	0.000507557			NA
NA	comp44132_c0_seq1	4.08111	4.10922	0.0108584			NA
NA	comp44297_c0_seq1	5.57063	3.47794	0.00402629			NA
NA	comp44339_c0_seq1	27.8794	D only	6.55e-44			NA
NA	comp4481_c0_seq1	833.495	13.9512	1.01e-184			NA
NA	comp44929_c0_seq1	8.35233	3.31449	0.00862567			NA
NA	comp45340_c0_seq1	28.7532	4.77489	5.81e-09			NA
NA	comp45371_c0_seq1	13.1761	2.39336	0.0180899			NA
NA	comp45410_c0_seq1	10.0644	3.2111	0.000653701			NA
NA	comp46258_c0_seq1	3.18087	4.05369	0.0387633			NA
NA	comp46501_c0_seq1	10.4138	4.64822	0.000374188			NA
NA	comp46717_c0_seq1	12.9952	2.22996	0.0197515			NA
NA	comp46733_c0_seq1	7.28608	2.70004	0.0268087			NA
NA	comp47469_c0_seq1	8.1962	3.5583	0.000272499			NA
NA	comp47966_c0_seq1	11.1769	2.49363	0.0155364			NA
NA	comp480_c0_seq1	943.683	4.10401	0.0301118			NA
NA	comp48330_c0_seq1	11.0664	4.32297	0.00561467			NA
NA	comp48729_c0_seq1	26.7096	D only	1.14e-42			NA
NA	comp48764_c0_seq1	23.0114	D only	1.38e-35			NA
NA	comp48765_c0_seq1	33.9232	D only	7.12e-50			NA
NA	comp48824_c0_seq1	41.5266	D only	2.2e-56			NA
NA	comp48836_c0_seq1	29.1126	3.85941	6.98e-18			NA
NA	comp48995_c0_seq1	12.0224	6.71593	1.96e-10			NA
NA	comp49742_c0_seq1	12.2136	D only	1.19e-29			NA
NA	comp49818_c0_seq1	12.4393	2.87329	0.000353786			NA
NA	comp49931_c0_seq1	12.7411	3.35568	0.0138018			NA
NA	comp50563_c0_seq1	6.89037	3.22559	0.0170167			NA
NA	comp50646_c0_seq1	12.5258	4.87965	1.21e-11			NA
NA	comp5095_c0_seq1	46.2994	5.45192	2.3e-08			NA
NA	comp5103_c0_seq1	4054.21	12.5782	3.08e-05			NA
NA	comp51114_c0_seq1	16.7991	4.08452	0.00155317			NA
NA	comp51191_c0_seq1	8.00428	3.66324	1.24e-05			NA
NA	comp51252_c0_seq1	16.6877	2.43107	0.0322971			NA
NA	comp51335_c0_seq1	21.7165	5.05304	0.000160866			NA
NA	comp51384_c0_seq1	12.0588	2.65194	0.00631264			NA
NA	comp51542_c0_seq1	16.6038	4.69538	0.00797868			NA
NA	comp51695_c0_seq1	31.2032	6.56507	9.81e-06			NA
NA	comp52246_c0_seq1	16.5717	D only	3.57e-30			NA
NA	comp528_c0_seq1	1025.12	4.91526	2.26e-16			NA
NA	comp53075_c0_seq1	14.6047	3.51877	4.35e-07			NA
NA	comp53777_c0_seq1	19.5621	3.60221	0.00172943			NA
NA	comp54078_c0_seq1	68.4558	D only	1.02e-84			NA
NA	comp54168_c0_seq1	26.7096	D only	1.14e-42			NA
NA	comp5535_c0_seq1	6652.27	12.7934	5.04e-06			NA
NA	comp55755_c0_seq1	25.5707	4.54352	6.52e-07			NA
NA	comp56693_c0_seq1	7.06609	3.03134	0.0331953			NA
NA	comp56729_c0_seq1	9.56273	3.82502	0.00253541			NA
NA	comp56758_c0_seq1	11.8592	4.24409	5.01e-05			NA
NA	comp57062_c0_seq1	7.07854	3.09994	0.0224285			NA
NA	comp57096_c0_seq1	6.57443	2.62178	0.0455363			NA
NA	comp5722_c0_seq1	64.3183	3.72426	0.00183887			NA
NA	comp57371_c0_seq1	7.98055	3.89093	1.93e-07			NA
NA	comp57505_c0_seq1	5.34259	2.58163	0.0375819			NA
NA	comp58166_c0_seq1	8.38282	4.8875	1.78e-06			NA
NA	comp58310_c0_seq1	6.68853	3.49008	0.00495472			NA
NA	comp58728_c0_seq1	7.17962	5.79179	0.000264683			NA
NA	comp58859_c0_seq1	8.95668	2.8856	0.00126603			NA
NA	comp59046_c0_seq1	17.9335	5.54589	0.0440838			NA
NA	comp59320_c0_seq1	14.6119	4.86492	0.00597297			NA
NA	comp59332_c0_seq1	8.11163	3.50966	0.00149292			NA
NA	comp59745_c0_seq1	7.21717	3.01915	0.0410724			NA
NA	comp59761_c0_seq1	24.955	D only	9.85e-41			NA
NA	comp59903_c0_seq1	46.9118	D only	4.65e-69			NA
NA	comp60376_c0_seq1	11.5233	D only	8.83e-16			NA
NA	comp60919_c0_seq1	6.41985	4.01241	0.00231709			NA
NA	comp61260_c0_seq1	9.63331	3.30418	0.00295176			NA
NA	comp61264_c0_seq1	9.27059	2.63233	0.007932			NA
NA	comp61656_c0_seq1	13.8656	6.21086	5.04e-06			NA
NA	comp62171_c0_seq1	11.8647	6.3129	4.81e-17			NA
NA	comp65182_c0_seq1	4.26214	2.95902	0.0151029			NA
NA	comp66040_c0_seq1	10.2136	4.06417	1.69e-06			NA
NA	comp66402_c0_seq1	12.6413	5.8061	1.14e-11			NA
NA	comp66641_c0_seq1	5.23981	2.74543	0.0295525			NA
NA	comp66815_c0_seq1	4.74584	4.00756	0.0115953			NA
NA	comp66944_c0_seq1	6.80596	3.1612	0.00692616			NA
NA	comp67214_c0_seq1	8.38704	4.57911	1.1e-06			NA
NA	comp67409_c0_seq1	7.24411	3.76924	0.00341916			NA
NA	comp67466_c0_seq1	4.42885	3.60678	0.0012798			NA
NA	comp6748_c0_seq1	227.256	D only	9.34e-113			NA
NA	comp67701_c0_seq1	10.0334	5.94305	1.8e-13			NA
NA	comp67717_c0_seq1	22.4386	D only	3.46e-29			NA
NA	comp67747_c0_seq1	3.62734	6.36666	0.000404322			NA
NA	comp68023_c0_seq1	10.8058	7.59454	0.0164678			NA
NA	comp68265_c0_seq1	9.73172	3.0403	0.021358			NA
NA	comp68700_c0_seq1	54.5413	D only	1.67e-76			NA
NA	comp68813_c0_seq1	3.29766	4.54299	0.000898432			NA
NA	comp69157_c0_seq1	11.0233	5.33854	1.91e-09			NA
NA	comp70068_c0_seq1	3.50929	D only	5.15e-07			NA
NA	comp70179_c0_seq1	14.2511	2.83017	4.46e-05			NA
NA	comp70457_c0_seq1	4.4189	5.0347	0.000160866			NA
NA	comp70770_c0_seq1	4.12729	4.06137	0.00722551			NA
NA	comp7093_c0_seq1	1341.56	12.2609	0.00177553			NA
NA	comp70956_c0_seq1	6.48991	5.71543	6.13e-06			NA
NA	comp71451_c0_seq1	5.14744	3.98861	0.00167939			NA
NA	comp72495_c0_seq1	7.27576	4.77874	0.0280483			NA
NA	comp72559_c0_seq1	7.33871	3.6949	2.28e-05			NA
NA	comp73438_c0_seq1	3.28157	4.26365	0.0249958			NA
NA	comp74434_c0_seq1	2.14173	D only	0.0275478			NA
NA	comp74700_c0_seq1	21.4408	D only	1.24e-34			NA
NA	comp7515_c0_seq1	4270.72	12.7287	4.07e-08			NA
NA	comp75198_c0_seq1	4.30783	3.74714	0.00923061			NA
NA	comp75222_c0_seq1	18.2454	D only	1.19e-23			NA
NA	comp75298_c0_seq1	6.96254	4.73368	0.000132594			NA
NA	comp753_c0_seq1	1430.09	2.99517	0.0486985			NA
NA	comp75370_c0_seq1	2.2779	3.34187	0.0359086			NA
NA	comp75983_c0_seq1	5.1636	3.49322	0.0489698			NA
NA	comp76178_c0_seq1	4.00657	3.79729	0.0455013			NA
NA	comp76324_c0_seq1	10.648	8.21691	9.65e-15			NA
NA	comp76589_c0_seq1	14.6221	D only	2.47e-27			NA
NA	comp76867_c0_seq1	7.8386	6.3309	7.87e-10			NA
NA	comp77284_c0_seq1	8.2791	2.73726	0.0353995			NA
NA	comp77478_c0_seq1	1.55969	D only	0.0143224			NA
NA	comp77853_c0_seq1	9.56271	D only	5.22e-18			NA
NA	comp77897_c0_seq1	5.80482	D only	5.1e-10			NA
NA	comp7841_c0_seq1	11.0729	D only	5.4e-26			NA
NA	comp78735_c0_seq1	6.06296	2.80766	0.0431213			NA
NA	comp7879_c0_seq1	46.1433	3.67162	1.76e-06			NA
NA	comp79258_c0_seq1	8.63885	4.51312	4.63e-06			NA
NA	comp79404_c0_seq1	4.11109	3.13705	0.0355446			NA
NA	comp79583_c0_seq1	6.21581	3.64424	0.00903083			NA
NA	comp79832_c0_seq1	4.25555	4.47616	2.5e-05			NA
NA	comp80874_c0_seq1	4.41688	4.08568	0.0177442			NA
NA	comp80892_c0_seq1	6.86091	4.0209	0.000513139			NA
NA	comp80988_c0_seq1	1.46627	D only	0.000285337			NA
NA	comp81247_c0_seq1	5.16569	3.86367	0.0196774			NA
NA	comp81314_c0_seq1	9.87002	D only	2.23e-15			NA
NA	comp81808_c0_seq1	9.54481	2.98543	0.00952505			NA
NA	comp81867_c0_seq1	5.57094	3.40972	0.0281011			NA
NA	comp82105_c0_seq1	6.0949	3.49643	0.0114152			NA
NA	comp82199_c0_seq1	2.72945	D only	3e-05			NA
NA	comp82557_c0_seq1	17.7414	D only	8.45e-32			NA
NA	comp82876_c0_seq1	5.70894	3.99451	0.0438362			NA
NA	comp82967_c0_seq1	3.76352	5.27299	0.0270238			NA
NA	comp83689_c0_seq1	7.29705	4.28218	9.75e-05			NA
NA	comp83866_c0_seq1	5.4022	3.94793	0.0131891			NA
NA	comp84611_c0_seq1	8.6804	7.11699	1.12e-10			NA
NA	comp84806_c0_seq1	13.412	4.06272	0.000444122			NA
NA	comp8499_c0_seq1	33.6022	2.79086	0.0155364			NA
NA	comp85086_c0_seq1	2.66177	2.70053	0.0152189			NA
NA	comp8527_c0_seq1	398.141	2.36239	0.0155364			NA
NA	comp85270_c0_seq1	9.98916	7.48044	0.00703413			NA
NA	comp85325_c0_seq1	3.84873	5.09365	0.0133926			NA
NA	comp854_c0_seq1	1007.69	3.38308	7.43e-09			NA
NA	comp86_c0_seq1	1246.37	2.92151	2.89e-14			NA
NA	comp86879_c0_seq1	5.63049	3.70919	0.029005			NA
NA	comp87022_c0_seq1	5.40669	5.12319	1.22e-05			NA
NA	comp87200_c0_seq1	5.03496	3.87732	0.0348219			NA
NA	comp87389_c0_seq1	4.19229	4.21108	0.000460207			NA
NA	comp87464_c0_seq1	2.44295	2.31312	0.0427327			NA
NA	comp87483_c0_seq1	4.47718	3.86513	0.0231843			NA
NA	comp87615_c0_seq1	18.6681	D only	3.21e-33			NA
NA	comp87881_c0_seq1	6.32169	5.4917	0.00266318			NA
NA	comp88355_c0_seq1	5.98171	5.81854	0.00264752			NA
NA	comp88360_c0_seq1	3.70425	D only	1.91e-07			NA
NA	comp88960_c0_seq1	7.73072	4.72388	0.000468103			NA
NA	comp8952_c0_seq1	62.1925	D only	1.75e-70			NA
NA	comp90105_c0_seq1	1.94961	D only	0.00181366			NA
NA	comp90618_c0_seq1	4.16842	D only	3.2e-07			NA
NA	comp90736_c0_seq1	3.32617	3.82	0.00994833			NA
NA	comp91559_c0_seq1	31.691	D only	1.36e-55			NA
NA	comp91577_c0_seq1	3.20497	5.42574	0.0160245			NA
NA	comp91623_c0_seq1	5.47772	5.9545	7.48e-05			NA
NA	comp91699_c0_seq1	3.31433	D only	1.41e-06			NA
NA	comp91716_c0_seq1	5.08263	3.99303	0.0133926			NA
NA	comp91755_c0_seq1	1.55969	D only	0.0143224			NA
NA	comp92854_c0_seq1	2.60161	D only	5.11e-05			NA
NA	comp92963_c0_seq1	1.6393	D only	0.00695872			NA
NA	comp93637_c0_seq1	4.32338	4.52505	0.00834669			NA
NA	comp9384_c0_seq1	86.9312	3.03631	0.00547624			NA
NA	comp9388_c0_seq1	121.208	3.25554	8.77e-07			NA
NA	comp93903_c0_seq1	4.00316	5.11862	0.00849033			NA
NA	comp9418_c0_seq1	74.1437	6.69572	4.81e-08			NA
NA	comp94339_c0_seq1	3.51335	7.04564	0.0012695			NA
NA	comp9496_c0_seq1	94.6715	6.71317	1.07e-07			NA
NA	comp95263_c0_seq1	1.55969	D only	0.0143224			NA
NA	comp9619_c0_seq1	28.137	3.16607	0.0135332			NA
NA	comp9650_c0_seq1	50.9889	D only	7.59e-64			NA
N-acetyltransferase 6	comp36810_c0_seq1	9.09798	2.73616	0.0460089	Q9R123	2e-06	Mus musculus
NADH-ubiquinone oxidoreductase 49 kDa subunit	comp32927_c0_seq1	65.3661	D only	4.07e-71	P15689	4e-41	Paramecium tetraurelia
NADH-ubiquinone oxidoreductase 49 kDa subunit	comp35156_c0_seq1	70.9677	D only	4.27e-71	P15689	8e-37	Paramecium tetraurelia
Nuclease S1	comp5142_c0_seq1	253.839	D only	1.04e-125	P24021	5e-06	Aspergillus oryzae RIB40
Oryzain alpha chain	comp30096_c0_seq1	49.715	D only	1.64e-62	P25776	5e-19	Oryza sativa Japonica Group
Peptidyl-prolyl cis-trans isomerase F, mitochondrial	comp30662_c0_seq1	16.6834	2.96596	2.56e-05	P29117	3e-10	Rattus norvegicus
Peroxiredoxin-2	comp52719_c0_seq1	24.7133	D only	1.14e-40	Q5RC63	8e-22	Pongo abelii
Peroxisomal targeting signal 1 receptor	comp10114_c0_seq1	181.87	3.17307	1.11e-06	O70525	7e-50	Cavia porcellus
Phosphoenolpyruvate carboxykinase [ATP]	comp4589_c0_seq1	1133.97	D only	9.43e-187	Q75JD5	7e-149	Dictyostelium discoideum
Protein archease	comp13593_c0_seq1	24.8207	3.4097	3.33e-05	Q505B7	4e-13	Mus musculus
Protein DD3-3	comp7031_c0_seq1	41.2036	3.86722	0.000214793	Q58A42	4e-05	Dictyostelium discoideum
Protein lin-12	comp62141_c0_seq1	15.1869	3.73773	0.000153334	P14585	2e-08	Caenorhabditis elegans
Protein TAR1	comp12794_c0_seq1	134.841	D only	3.38e-94	Q8TGM6	5e-07	Saccharomyces cerevisiae S288c
Protein TAR1	comp14538_c0_seq1	160.53	11.0168	0.000592016	Q8TGM6	0.0004	Saccharomyces cerevisiae S288c
Protein TAR1	comp4911_c0_seq1	225.402	10.6602	3.27e-20	Q8TGM6	2e-05	Saccharomyces cerevisiae S288c
Putative molluscan insulin-related peptide(s) receptor	comp54976_c0_seq1	3.47244	7.66803	2.09e-05	Q25410	0.002	Lymnaea stagnalis
Putative transporter B0252.3	comp23090_c0_seq1	112.687	D only	4.42e-93	Q10917	3e-08	Caenorhabditis elegans
Pyrophosphate-energized vacuolar membrane proton pump	comp14140_c0_seq1	140.33	D only	5.33e-102	P21616	1e-29	Vigna radiata var. radiata
Pyrophosphate-energized vacuolar membrane proton pump	comp17898_c0_seq1	73.2091	D only	1.42e-76	Q06572	5e-25	Hordeum vulgare
Pyrophosphate-energized vacuolar membrane proton pump	comp18591_c0_seq1	237.343	D only	1.64e-123	Q06572	1e-80	Hordeum vulgare
Pyrophosphate-energized vacuolar membrane proton pump	comp22956_c0_seq1	166.71	D only	3.41e-109	P21616	2e-24	Vigna radiata var. radiata
Pyrophosphate--fructose 6-phosphate 1-phosphotransferase subunit beta	comp44359_c0_seq1	48.2033	D only	2.44e-61	P21343	2e-18	Solanum tuberosum
Ras-related protein Rab-27A	comp28749_c0_seq1	26.9598	3.29363	1.42e-09	P23640	3e-13	Rattus norvegicus
Ras-related protein Rap-1b	comp50347_c0_seq1	8.10602	3.66504	2.6e-05	Q6TEN1	1e-13	Danio rerio
RING finger protein 113A	comp23251_c0_seq1	63.2924	2.60734	0.0278842	O15541	2e-79	Homo sapiens
Sedoheptulose-1,7-bisphosphatase, chloroplastic	comp43063_c0_seq1	58.0983	D only	4.9e-68	P46285	7e-21	Triticum aestivum
Selenoprotein H	comp2268_c0_seq1	388.948	3.54821	0.00146865	Q8IZQ5	3e-17	Homo sapiens
SH3 domain-binding protein 5	comp32204_c0_seq1	11.9996	3.21834	0.00490406	Q91Y80	0.0001	Rattus norvegicus
SH3 domain-binding protein 5 homolog	comp19785_c0_seq1	48.2302	2.47766	0.0115028	Q9V785	5e-26	Drosophila melanogaster
Signal recognition particle 14 kDa protein	comp10225_c0_seq1	54.3674	2.47424	0.000141213	A6QQL9	8e-14	Bos taurus
Sodium/bile acid cotransporter 7	comp13028_c0_seq1	57.3491	2.45164	0.0436779	Q5ZJH8	3e-49	Gallus gallus
Spermatogenesis-associated protein 17	comp25427_c0_seq1	10.9698	3.06837	0.00138683	Q96L03	0.0007	Homo sapiens
Succinate dehydrogenase [ubiquinone] flavoprotein subunit 1, mitochondrial	comp52715_c0_seq1	29.0491	D only	3.97e-45	O82663	4e-33	Arabidopsis thaliana
T-complex protein 1 subunit theta	comp11371_c0_seq1	64.2479	2.37588	0.00714979	Q6EE31	5e-53	Gallus gallus
Thiol protease aleurain	comp66683_c0_seq1	18.3263	D only	1.36e-32	P05167	7e-12	Hordeum vulgare
Thiol protease SEN102	comp18089_c0_seq1	59.9625	D only	7.19e-70	P43156	1e-16	Hemerocallis hybrid cultivar
Transmembrane protein 33	comp13831_c0_seq1	42.5891	2.63642	0.000114088	Q9Z142	1e-17	Rattus norvegicus
Triosephosphate isomerase	comp27410_c0_seq1	52.8397	D only	5.29e-65	P91895	6e-24	Anopheles merus
Triosephosphate isomerase, chloroplastic	comp21568_c0_seq1	70.9657	D only	2.43e-75	Q9M4S8	1e-22	Fragaria x ananassa
Triosephosphate isomerase, cytosolic	comp39989_c0_seq1	34.3131	D only	3.14e-50	P46226	3e-18	Secale cereale
Triosephosphate isomerase, glycosomal	comp43535_c0_seq1	29.6834	D only	7.72e-46	P52270	1e-12	Trypanosoma cruzi
Troponin C, skeletal muscle	comp15464_c0_seq1	74.1225	3.21834	0.00846955	P81660	5e-10	Anguilla anguilla
Tubulin alpha chain	comp25954_c0_seq1	35.1428	D only	4.16e-49	P28287	2e-30	Oxytricha granulifera
Ubiquitin-60S ribosomal protein L40	comp47161_c0_seq1	1.22186	D only	0.0231019	P0C224	9e-30	Neurospora crassa OR74A
Ubiquitin-like modifier-activating enzyme 6	comp28651_c0_seq1	23.6553	2.5504	0.000796112	A0AVT1	8e-24	Homo sapiens
Uncharacterized histidine-rich protein DDB_G0274557	comp58155_c0_seq1	19.1062	D only	1.26e-33	Q8MP30	0.004	Dictyostelium discoideum
Uncharacterized oxidoreductase MSMEG_2408	comp63949_c0_seq1	8.04133	3.44125	0.00757072	A0QV10	4e-28	Mycobacterium smegmatis str. MC2 155
Uncharacterized protein C7orf31	comp45831_c0_seq1	9.19398	2.48528	0.0108698	Q8N865	1e-11	Homo sapiens
Uncharacterized protein ORF91	comp23093_c0_seq1	37.869	7.61648	7.01e-06	Q3BAI2	3e-05	Phalaenopsis aphrodite subsp. formosana
Uncharacterized protein ORF91	comp33749_c0_seq1	13.0524	6.24557	2.88e-22	Q3BAI2	1e-06	Phalaenopsis aphrodite subsp. formosana
Uncharacterized protein Rv0574c/MT0602	comp25774_c0_seq1	22.201	2.36895	0.00187968	O53771	2e-33	Mycobacterium tuberculosis
Uncharacterized protein TC_0114	comp28102_c0_seq1	12.4598	6.46375	4.11e-23	Q9PLI5	2e-13	Chlamydia muridarum
Uncharacterized protein YLR154C-G	comp4892_c0_seq1	4047.07	12.4892	3.63e-07	Q3E813	0.006	Saccharomyces cerevisiae S288c
Vacuolar protease A	comp38419_c0_seq1	46.9855	D only	1.46e-60	C5FS55	5e-21	Arthroderma otae CBS 113480
Vacuolar-processing enzyme	comp29831_c0_seq1	89.487	D only	4.06e-84	O24325	5e-05	Phaseolus vulgaris
Vacuolar-processing enzyme	comp31213_c0_seq1	84.223	D only	8.4e-82	O24325	9e-36	Phaseolus vulgaris
Vegetative incompatibility protein HET-E-1	comp77859_c0_seq1	5.39609	3.17861	0.0452377	Q00808	8e-19	Podospora anserina
Villin-1	comp38484_c0_seq1	17.2242	2.66905	7.96e-07	P02640	8e-41	Gallus gallus
WASH complex subunit FAM21	comp25885_c0_seq1	19.1681	2.27253	0.0325937	Q80X08	8e-16	Rattus norvegicus
